# Supplementary material for: Formal synthesis of chelamidine alkaloids and their derivatives
Source: Royal Society of Chemistry journal article supplement (doi:10.1039/c7cc09875h), 2018-01-01

## Supporting Information for

### Formal Synthesis of Chelamidine Alkaloid and Derivatives

Rui-Qi Li,<sup>a</sup> Yu He,<sup>a</sup> Yao Ding,<sup>a</sup> Chee-Kiat Ang,<sup>b</sup> Jie-Sheng Tian,<sup>\*,a</sup> and Teck-Peng Loh<sup>\*,a,b</sup>

<sup>a</sup>*Institute of Advanced Synthesis (IAS), School of Chemistry and Molecular Engineering (SCME), Jiangsu National Synergetic Innovation Center for Advanced Materials (SICAM), Nanjing Tech University (NanjingTech), 30 South Puzhu Road, Nanjing 211816, P. R. China.*

<sup>b</sup>*Division of Chemistry and Biological Chemistry, School of Physical and Mathematical Sciences, Nanyang Technological University, Singapore 637371.*  
*ias\_jstian@njtech.edu.cn, teckpeng@ntu.edu.sg*

## Table of Contents

|                                                                                                                                                                     |     |
|---------------------------------------------------------------------------------------------------------------------------------------------------------------------|-----|
| 1. General information                                                                                                                                              | S2  |
| 2. General experimental procedure for the synthesis of $\alpha$ -amino acetals and spectroscopic information                                                        | S2  |
| 3. Optimization study for the construction of aza-polycyclic frameworks via Friedel-Crafts/Prins-type cyclization reaction                                          | S8  |
| 4. General experimental procedure for the construction of aza-polycyclic frameworks with <i>endo</i> or <i>exo</i> -cyclic double bond and spectroscopic informatio | S10 |
| 5. General experimental procedure for gram-scale reaction                                                                                                           | S18 |
| 6. Formal synthesis of homochelidonine and chelamidine                                                                                                              | S18 |
| 7. Reference                                                                                                                                                        | S24 |
| 8. X-ray diffraction analysis                                                                                                                                       | S25 |
| 9. <sup>1</sup> H and <sup>13</sup> C NMR spectra                                                                                                                   | S27 |

## 1. General Information

All reactions were carried out without exclusion of air or moisture unless otherwise stated. Molecular iodine, sodium percarbonate (avail. H<sub>2</sub>O<sub>2</sub> 20-30%), and trifluoromethanesulfonic acid were purchased from commercial suppliers, and used directly as received. Commercial solvents and reagents were used without further purification. Secondary amines<sup>1-4</sup> and aldehydes<sup>5-8</sup> were synthesized according to the literatures. Reactions were monitored through thin layer chromatography [Merck 60 F254 precoated silica gel plate (0.2 mm thickness)]. Subsequent to elution, spots were visualized using UV radiation (254 nm) on Spectroline Model ENF-24061/F 254 nm. Further visualization was possible using basic solution of potassium permanganate or acidic solution of ceric molybdate as stain, followed by heating on a hot plate. Flash chromatography was performed using Merck silica gel 60 with distilled solvents. Infrared spectra were recorded on a Shimadzu IR Prestige-21 FT-IR. Liquid samples were examined as film between NaCl salt plates. HRMS spectra were recorded on a Waters Q-ToF Premier Spectrometer. <sup>1</sup>H NMR and <sup>13</sup>C NMR spectra were recorded using Bruker Avance 400 and 500 MHz spectrometers. Chemical shifts for <sup>1</sup>H NMR spectra are reported as  $\delta$  in units of parts per million (ppm) downfield from SiMe<sub>4</sub> ( $\delta$  0.0) and relative to the signal of chloroform-*d* ( $\delta$  7.260, singlet). Multiplicities were given as: s (singlet); brs (broad singlet); d (doublet); t (triplet); q (quartet); dd (doublets of doublet); ddd (doublets of doublets of doublet); td (triplet of doublet); m (multiplets); ddt (doublet of doublet of triplet) and etc. Coupling constants are reported as a *J* value in Hz. Carbon nuclear magnetic resonance spectra (<sup>13</sup>C NMR) are reported as  $\delta$  in units of parts per million (ppm) downfield from SiMe<sub>4</sub> ( $\delta$  0.0) and relative to the signal of chloroform-*d* ( $\delta$  77.00, triplet).

## 2. General Experimental Procedure for the Synthesis of $\alpha$ -Amino Acetals<sup>9-10</sup> and Spectroscopic Information

Iodine (25 mg, 0.1 mmol) was added to a mixture of sodium percarbonate (79 mg, 0.5 mmol), secondary amines (0.5 mmol), and aldehydes (0.60 mmol) in methanol (0.5 mL)/1,2-dichloroethane (2.0 mL) at room temperature. The mixture was stirred at 40 °C until secondary amine was completely converted by TLC detection. The resulting reaction mixture was mixed with a small amount of silica gel and concentrated. The crude product was purified by flash column chromatography (silica gel; ethyl acetate or diethyl ether/hexane = 1:100, v/v) to afford the corresponding desired product.

***N*-allyl-*N*-(1,1-dimethoxy-4-phenylbutan-2-yl)-3-methylbut-2-en-1-amine (1a):**

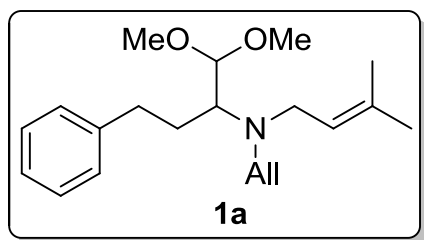

Light yellow oil;  $R_f = 0.59$  (hexane: ethyl acetate = 5:1);  $^1\text{H NMR}$  ( $\text{CDCl}_3$ , 400 MHz)  $\delta$  7.27-7.12 (m, 5H), 5.85-5.76 (m, 1H), 5.19-5.03 (m, 3H), 4.27 (d,  $J = 5.39$  Hz, 1H), 3.34 (s, 3H), 3.33 (s, 3H), 3.33-3.27 (m, 1H), 3.19-3.09 (m, 3H), 2.85-2.76 (m, 2H), 2.64-2.56 (m, 1H), 1.83-1.65 (m, 2H), 1.70 (s, 3H), 1.62 (s, 3H) ppm;  $^{13}\text{C NMR}$  ( $\text{CDCl}_3$ , 100 MHz)  $\delta$  143.1, 138.4, 133.4, 128.5 (CH x 2), 128.1 (CH x 2), 125.4, 123.8, 115.6, 107.0, 58.6, 54.6, 54.4, 53.3, 48.0, 33.3, 28.6, 25.8, 17.9 ppm; **HRMS (ESI, m/z):** calcd for  $\text{C}_{20}\text{H}_{32}\text{NO}_2^+ [\text{M}+\text{H}]^+$  318.2433, found: 318.2436.

***N*-allyl-*N*-(1,1-dimethoxy-4-(*o*-tolyl)butan-2-yl)-3-methylbut-2-en-1-amine (1b):**

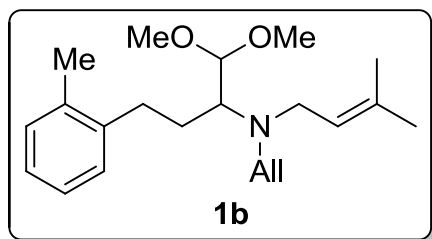

Light yellow oil;  $R_f = 0.59$  (hexane: ethyl acetate = 5:1);  $^1\text{H NMR}$  ( $\text{CDCl}_3$ , 400 MHz)  $\delta$  7.18-7.06 (m, 4H), 5.89-5.79 (m, 1H), 5.23-5.06 (m, 3H), 4.31 (d,  $J = 5.50$  Hz, 1H), 3.38 (s, 3H), 3.37 (s, 3H), 3.34-3.29 (m, 1H), 3.22-3.13 (m, 3H), 2.91-2.79 (m, 2H), 2.61-2.53 (m, 1H), 2.33 (s, 3H), 1.76-1.59 (m, 8H) ppm;  $^{13}\text{C NMR}$  ( $\text{CDCl}_3$ , 100 MHz)  $\delta$  141.4, 138.4, 135.9, 133.6, 130.0, 128.8, 125.8, 125.6, 123.8, 115.8, 107.1, 59.2, 54.6, 54.5, 53.4, 48.0, 31.1, 27.5, 25.9, 19.3, 18.0 ppm; **HRMS (ESI, m/z):** calcd for  $\text{C}_{21}\text{H}_{34}\text{NO}_2^+ [\text{M}+\text{H}]^+$  332.2590, found: 332.2586.

***N*-allyl-*N*-(1,1-dimethoxy-4-(4-methoxyphenyl)butan-2-yl)-3-methylbut-2-en-1-amine (1c):**

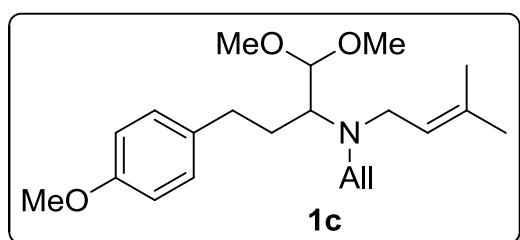

Light yellow oil;  $R_f = 0.51$  (hexane: ethyl acetate = 5:1);  $^1\text{H NMR}$  ( $\text{CDCl}_3$ , 400 MHz)  $\delta$  7.12 (d,  $J = 8.40$  Hz, 2H), 6.81 (d,  $J = 8.45$  Hz, 2H), 5.86-5.76 (m, 1H), 5.18-5.03 (m, 3H), 4.27 (d,  $J = 5.39$  Hz, 1H), 3.77 (s, 3H), 3.34 (s, 3H), 3.33 (s, 3H), 3.32-3.27 (m, 1H), 3.19-3.09 (m, 3H), 2.83-2.71 (m, 2H), 2.59-2.51 (m, 1H), 1.79-1.62 (m, 8H) ppm;  $^{13}\text{C NMR}$  ( $\text{CDCl}_3$ , 100 MHz)  $\delta$  157.5, 138.4, 135.2, 133.4, 129.4 (CH x 2), 123.9, 115.6, 113.6 (CH x 2), 107.1, 58.6, 55.2, 54.6, 54.4, 53.4, 48.1, 32.3, 28.9, 25.9, 17.9 ppm; **HRMS (ESI, m/z)**: calcd for  $\text{C}_{21}\text{H}_{34}\text{NO}_3^+ [\text{M}+\text{H}]^+$  348.2539, found: 348.2537.

***N*-allyl-*N*-(1,1-dimethoxy-4-(thiophen-3-yl)butan-2-yl)-3-methylbut-2-en-1-amine (1d):**

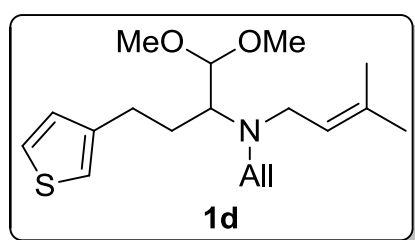

Light yellow oil;  $R_f = 0.59$  (hexane: ethyl acetate = 5:1);  $^1\text{H NMR}$  ( $\text{CDCl}_3$ , 400 MHz)  $\delta$  7.23-7.21 (m, 1H), 6.97-6.95 (m, 2H), 5.85-5.75 (m, 1H), 5.17-5.04 (m, 3H), 4.30 (d,  $J = 5.31$  Hz, 1H), 3.36 (s, 3H), 3.35 (s, 3H), 3.34-3.29 (m, 1H), 3.20-3.09 (m, 3H), 2.86-2.79 (m, 2H), 2.70-2.62 (m, 1H), 1.85-1.67 (m, 5H), 1.63 (s, 3H) ppm;  $^{13}\text{C NMR}$  ( $\text{CDCl}_3$ , 100 MHz)  $\delta$  143.4, 138.4, 133.5, 128.4, 124.8, 123.8, 123.8, 119.8, 115.6, 106.9, 58.5, 54.7, 54.3, 53.3, 48.0, 27.6, 27.5, 25.9, 17.9 ppm; **HRMS (ESI, m/z)**: calcd for  $\text{C}_{18}\text{H}_{30}\text{NO}_2\text{S}^+ [\text{M}+\text{H}]^+$  324.1997, found: 324.1992.

***N*-allyl-*N*-(3-(1-benzyl-1*H*-indol-3-yl)-1,1-dimethoxypropan-2-yl)-3-methylbut-2-en-1-amine (1e):**

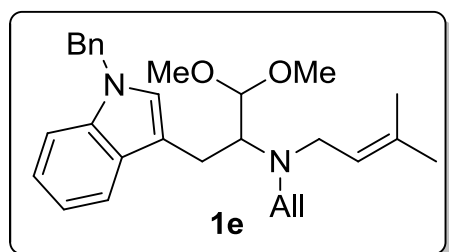

Light yellow oil;  $R_f = 0.44$  (hexane: ethyl acetate = 5:1);  $^1\text{H NMR}$  ( $\text{CDCl}_3$ , 400 MHz)  $\delta$  7.62 (d,  $J = 7.71$  Hz, 1H), 7.28-7.20 (m, 4H), 7.15-7.05 (m, 4H), 6.99 (m, 1H), 5.71-5.61 (m, 1H), 5.26 (s, 2H), 5.02-4.90 (m, 3H), 4.33 (d,  $J = 5.39$  Hz, 1H), 3.38 (s, 6H), 3.29-3.13 (m, 5H), 3.00-2.85 (m, 2H), 1.56 (s, 3H), 1.47 (s, 3H) ppm;  $^{13}\text{C NMR}$  ( $\text{CDCl}_3$ , 100 MHz)

$\delta$  138.5, 138.0, 136.4, 133.2, 128.60 (CH x 2), 128.57, 127.4, 126.8, 126.7 (CH x 2), 123.9, 121.3, 119.3, 118.6, 115.5, 114.0, 109.3, 107.2, 59.8, 54.9, 54.6, 53.6, 49.7, 48.2, 25.7, 22.0, 17.8 ppm; **HRMS (ESI, m/z)**: calcd for  $C_{28}H_{37}N_2O_2^+$   $[M+H]^+$  433.2855, found: 433.2856.

***N*-allyl-*N*-cinnamyl-1,1-dimethoxy-4-phenylbutan-2-amine (1f):**

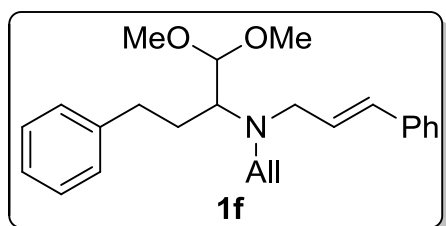

Light yellow oil;  $R_f$  = 0.64 (hexane: ethyl acetate = 5:1);  **$^1H$  NMR ( $CDCl_3$ , 400 MHz)**  $\delta$  7.36-7.19 (m, 9H), 7.17-7.13 (m, 1H), 6.46 (d,  $J$  = 15.89 Hz, 1H), 6.21-6.13 (m, 1H), 5.88-5.78 (m, 1H), 5.17 (d,  $J$  = 17.17 Hz, 1H), 5.07 (d,  $J$  = 10.16 Hz, 1H), 4.31 (d,  $J$  = 5.33 Hz, 1H), 3.48-3.31 (m, 9H), 3.23-3.18 (m, 1H), 2.90-2.82 (m, 2H), 2.67-2.59 (m, 1H), 1.87-1.69 (m, 2H) ppm;  **$^{13}C$  NMR ( $CDCl_3$ , 100 MHz)**  $\delta$  143.0, 138.0, 137.4, 131.2, 129.9, 128.54 (CH x 2), 128.47 (CH x 2), 128.2 (CH x 2), 127.1, 126.2 (CH x 2), 125.5, 116.1, 107.1, 59.0, 54.8, 54.6, 53.6, 53.0, 33.3, 28.8 ppm; **HRMS (ESI, m/z)**: calcd for  $C_{24}H_{32}NO_2^+$   $[M+H]^+$  366.2433, found: 366.2431.

***N*-allyl-1,1-dimethoxy-4-phenyl-*N*-(2-phenylallyl)butan-2-amine (1g):**

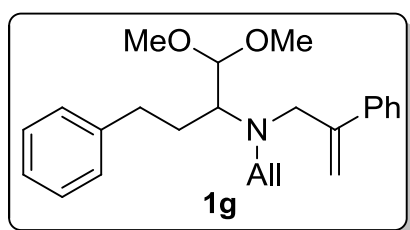

Light yellow oil;  $R_f$  = 0.60 (hexane: ethyl acetate = 5:1);  **$^1H$  NMR ( $CDCl_3$ , 400 MHz)**  $\delta$  7.43 (d,  $J$  = 7.83 Hz, 2H), 7.32-7.12 (m, 6H), 7.07 (d,  $J$  = 7.61 Hz, 2H), 5.82-5.72 (m, 1H), 5.35 (d,  $J$  = 29.55 Hz, 2H), 5.13 (d,  $J$  = 17.16 Hz, 1H), 5.06 (d,  $J$  = 9.83 Hz, 1H), 4.26 (d,  $J$  = 5.00 Hz, 1H), 3.67 (AB<sub>q</sub>,  $J$  = 14.52 Hz, 2H), 3.36-3.30 (m, 7H), 3.20-3.14 (m, 1H), 2.88-2.84 (m, 1H), 2.58-2.50 (m, 1H), 2.31-2.23 (m, 1H), 1.80-1.60 (m, 2H) ppm;  **$^{13}C$  NMR ( $CDCl_3$ , 100 MHz)**  $\delta$  146.9, 143.2, 140.6, 137.9, 128.4 (CH x 2), 128.1 (CH x 2), 128.0 (CH x 2), 127.3, 126.8 (CH x 2), 125.4, 116.5, 114.8, 107.3, 58.7, 54.97, 54.94, 54.7,

53.4, 33.1, 28.4 ppm; **HRMS (ESI, m/z)**: calcd for  $C_{24}H_{32}NO_2^+ [M+H]^+$  366.2433, found: 366.2432.

***N*-allyl-1,1-dimethoxy-*N*-(2-phenylallyl)-4-(*o*-tolyl)butan-2-amine (1h):**

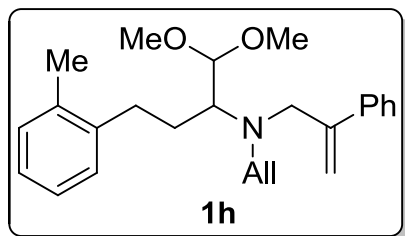

Light yellow oil;  $R_f = 0.71$  (hexane: ethyl acetate = 5:1);  **$^1H$  NMR ( $CDCl_3$ , 400 MHz)**  $\delta$  7.43 (d,  $J = 7.51$  Hz, 2H), 7.30-7.20 (m, 3H), 7.08-7.01 (m, 4H), 5.86-5.76 (m, 1H), 5.37 (d,  $J = 30.08$  Hz, 2H), 5.16 (d,  $J = 17.17$  Hz, 1H), 5.09 (d,  $J = 10.10$  Hz, 1H), 4.27 (d,  $J = 5.15$  Hz, 1H), 3.69 (AB<sub>q</sub>,  $J = 14.50$  Hz, 2H), 3.38-3.30 (m, 7H), 3.19-3.13 (m, 1H), 2.94-2.89 (m, 1H), 2.54-2.46 (m, 1H), 2.26-2.17 (m, 1H), 2.15 (s, 3H), 1.72-1.53 (m, 2H) ppm;  **$^{13}C$  NMR ( $CDCl_3$ , 100 MHz)**  $\delta$  146.8, 141.4, 140.5, 137.8, 135.8, 129.9, 128.5, 127.9 (CH x 2), 127.3, 126.7 (CH x 2), 125.7, 125.5, 116.5, 114.9, 107.1, 58.9, 55.0, 54.9, 54.7, 53.2, 30.7, 27.3, 19.2 ppm; **HRMS (ESI, m/z)**: calcd for  $C_{25}H_{34}NO_2^+ [M+H]^+$  380.2590, found: 380.2583.

***N*-allyl-1,1-dimethoxy-4-(4-methoxyphenyl)-*N*-(2-phenylallyl)butan-2-amine (1i):**

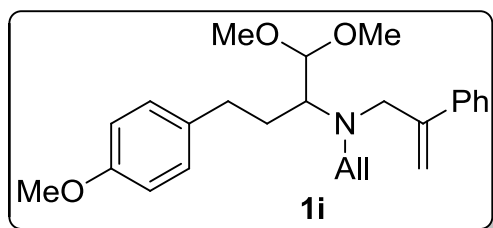

Light yellow oil;  $R_f = 0.62$  (hexane: ethyl acetate = 5:1);  **$^1H$  NMR ( $CDCl_3$ , 400 MHz)**  $\delta$  7.42 (d,  $J = 7.25$  Hz, 2H), 7.32-7.22 (m, 3H), 6.98 (d,  $J = 8.48$  Hz, 2H), 6.77 (d,  $J = 8.47$  Hz, 2H), 5.82-5.71 (m, 1H), 5.35 (d,  $J = 27.84$  Hz, 2H), 5.12 (d,  $J = 17.00$  Hz, 1H), 5.06 (d,  $J = 10.10$  Hz, 1H), 4.25 (d,  $J = 5.04$  Hz, 1H), 3.75 (s, 3H), 3.66 (AB<sub>q</sub>,  $J = 14.56$  Hz, 2H), 3.35-3.31 (m, 7H), 3.20-3.15 (m, 1H), 2.87-2.82 (m, 1H), 2.52-2.45 (m, 1H), 2.27-2.19 (m, 1H), 1.77-1.57 (m, 2H) ppm;  **$^{13}C$  NMR ( $CDCl_3$ , 100 MHz)**  $\delta$  157.5, 146.9, 140.6, 137.9, 135.2, 129.2 (CH x 2), 127.9 (CH x 2), 127.3, 126.7 (CH x 2), 116.4, 114.8, 113.5 (CH x 2), 107.3, 58.6, 55.2, 54.9 (CH<sub>2</sub> x 1), 54.9 (CH<sub>3</sub> x 1), 54.7, 53.4, 32.2, 28.6 ppm; **HRMS (ESI, m/z)**: calcd for  $C_{25}H_{34}NO_3^+ [M+H]^+$  396.2539, found: 396.2541.

***N*-allyl-1,1-dimethoxy-4-(naphthalen-2-yl)-*N*-(2-phenylallyl)butan-2-amine (1j):**

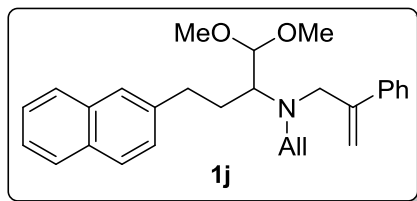

Light yellow oil;  $R_f$  = 0.60 (hexane: ethyl acetate = 10:1);  $^1\text{H}$  NMR ( $\text{CDCl}_3$ , 400 MHz)  $\delta$  7.80 – 7.71 (m, 3H), 7.51 (s, 1H), 7.48-7.37 (m, 4H), 7.36-7.27 (m, 3H), 7.26-7.20 (m, 1H), 5.90 – 5.71 (m, 1H), 5.41-5.33 (m, 2H), 5.18-5.06 (m, 2H), 4.31 (dd,  $J$  = 5.0, 1.8 Hz, 1H), 3.93 – 3.52 (m, 2H), 3.46 – 3.31 (m, 7H), 3.26 – 3.11 (m, 1H), 2.96-2.90 (m, 1H), 2.74-2.66 (m, 1H), 2.55 – 2.36 (m, 1H), 1.96 – 1.68 (m, 2H);  $^{13}\text{C}$  NMR ( $\text{CDCl}_3$ , 100 MHz)  $\delta$  146.97, 140.76, 140.69, 138.00, 133.68, 131.92, 128.13, 127.95, 127.67, 127.49, 127.45, 126.90, 126.21, 125.81, 124.98, 116.71, 115.10, 107.23, 58.66, 55.18, 55.00, 54.85, 53.56, 33.30, 28.25 ppm; HRMS (ESI,  $m/z$ ): calcd for  $\text{C}_{24}\text{H}_{32}\text{NO}_2^+$   $[\text{M}+\text{H}]^+$  416.2590, found: 416.2586.

***N*-allyl-1,1-dimethoxy-*N*-(2-phenylallyl)-4-(thiophen-3-yl)butan-2-amine (1k):**

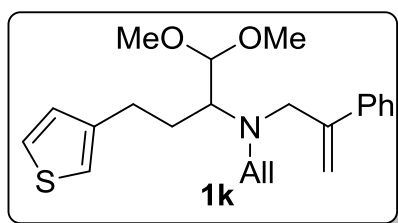

Light yellow oil;  $R_f$  = 0.70 (hexane: ethyl acetate = 5:1);  $^1\text{H}$  NMR ( $\text{CDCl}_3$ , 400 MHz)  $\delta$  7.40 (d,  $J$  = 7.13 Hz, 2H), 7.31-7.24 (m, 3H), 7.18-7.16 (m, 1H), 6.82-6.80 (m, 2H), 5.79-5.69 (m, 1H), 5.33 (d,  $J$  = 33.03 Hz, 2H), 5.12 (d,  $J$  = 17.18 Hz, 1H), 5.05 (d,  $J$  = 10.11 Hz, 1H), 4.26 (d,  $J$  = 4.94 Hz, 1H), 3.65 (AB<sub>q</sub>,  $J$  = 14.49 Hz, 2H), 3.34-3.30 (m, 7H), 3.18-3.13 (m, 1H), 2.87-2.82 (m, 1H), 2.56-2.48 (m, 1H), 2.32-2.24 (m, 1H), 1.81-1.62 (m, 2H) ppm;  $^{13}\text{C}$  NMR ( $\text{CDCl}_3$ , 100 MHz)  $\delta$  146.9, 143.3, 140.6, 137.8, 128.3, 127.9 (CH x 2), 127.3, 126.7 (CH x 2), 124.7, 119.5, 116.4, 114.8, 107.1, 58.4, 55.0, 54.9, 54.6, 53.4, 27.4, 27.2 ppm; HRMS (ESI,  $m/z$ ): calcd for  $\text{C}_{22}\text{H}_{30}\text{NO}_2\text{S}^+$   $[\text{M}+\text{H}]^+$  372.1997, found: 372.1998.

***N*-allyl-4-(1-benzyl-1*H*-indol-3-yl)-1,1-dimethoxy-*N*-(2-phenylallyl)butan-2-amine (1l):**

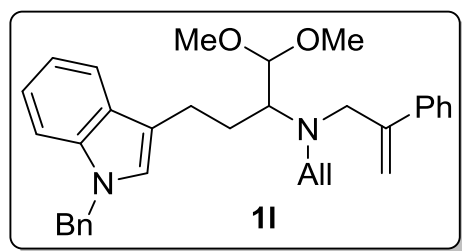

Light yellow oil;  $R_f$  = 0.60 (hexane: ethyl acetate = 5:1);  $^1\text{H}$  NMR ( $\text{CDCl}_3$ , 400 MHz)  $\delta$  7.48 (d,  $J$  = 7.80 Hz, 1H), 7.44-7.41 (m, 2H), 7.30-7.04 (m, 11H), 6.79 (s, 1H), 5.83-5.73 (m, 1H), 5.34 (d,  $J$  = 26.11 Hz, 2H), 5.20 (s, 2H), 5.11 (d,  $J$  = 17.28 Hz, 1H), 5.03 (d,  $J$  = 10.28 Hz, 1H), 4.28 (d,  $J$  = 5.01 Hz, 1H), 3.68 (AB<sub>q</sub>,  $J$  = 14.51 Hz, 2H), 3.38-3.33 (m, 4H), 3.31 (s, 3H), 3.20-3.15 (m, 1H), 2.98-2.93 (m, 1H), 2.73-2.66 (m, 1H), 2.46-2.35 (m, 1H), 1.90-1.73 (m, 2H) ppm;  $^{13}\text{C}$  NMR ( $\text{CDCl}_3$ , 100 MHz)  $\delta$  146.9, 140.6, 138.0, 137.9, 136.6, 128.6 (CH x 2), 128.3, 128.0 (CH x 2), 127.4, 127.3, 126.8 (CH x 2), 126.7 (CH x 2), 125.1, 121.4, 119.3, 118.5, 116.5, 116.4, 114.8, 109.3, 107.3, 58.7, 54.98, 54.94, 54.6, 53.4, 49.7, 26.8, 22.4 ppm; HRMS (ESI,  $m/z$ ): calcd for  $\text{C}_{33}\text{H}_{39}\text{N}_2\text{O}_2^+$   $[\text{M}+\text{H}]^+$  495.3012, found: 495.3008.

#### ***N*-allyl-1,1-dimethoxy-*N*-(2-methylallyl)-4-phenylbutan-2-amine (1m):**

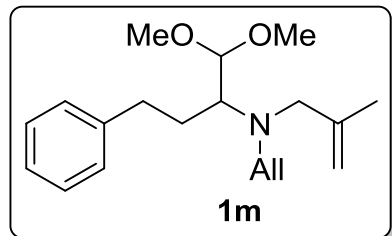

Light yellow oil;  $R_f$  = 0.75 (hexane: ethyl acetate = 5:1);  $^1\text{H}$  NMR ( $\text{CDCl}_3$ , 400 MHz)  $\delta$  7.27-7.13 (m, 5H), 5.84-5.74 (m, 1H), 5.12 (d,  $J$  = 17.19 Hz, 1H), 5.04 (d,  $J$  = 10.10 Hz, 1H), 4.86 (d,  $J$  = 30.56 Hz, 2H), 4.28 (d,  $J$  = 5.02 Hz, 1H), 3.35 (s, 6H), 3.27-3.03 (m, 4H), 2.90-2.82 (m, 2H), 2.62-2.55 (m, 1H), 1.85-1.64 (m, 5H) ppm;  $^{13}\text{C}$  NMR ( $\text{CDCl}_3$ , 100 MHz)  $\delta$  144.6, 143.1, 138.1, 128.4 (CH x 2), 128.2 (CH x 2), 125.5, 116.1, 112.3, 107.0, 58.6, 56.8, 54.74, 54.65, 53.6, 33.5, 28.7, 20.6 ppm; HRMS (ESI,  $m/z$ ): calcd for  $\text{C}_{19}\text{H}_{30}\text{NO}_2^+$   $[\text{M}+\text{H}]^+$  304.2277, found: 304.2276.

### **3. Optimization Study for the Construction of Aza-Polycyclic Frameworks via Friedel-Crafts/Prins-type Cyclization Reaction**

An optimization study was performed using the  $\alpha$ -amino acetal **1a** as the model substrate to examine various reaction conditions. The reaction of the  $\alpha$ -amino acetal **1a** without any



additive at 20 °C in dichloromethane did not afford any desired products after a 24 hour reaction time (Table S1, entry 1). This confirmed that the reaction could not proceed in the absence of Lewis or Brønsted acids. Various Lewis acids ( $\text{AlCl}_3$ ,  $\text{FeCl}_3$ , and  $\text{BF}_3\cdot\text{OEt}_2$ ) and Brønsted acids such as trifluoroacetic acid (TFA) and trifluoromethanesulfonic acid (TfOH) were then tested for this reaction. It was observed that TfOH was the most efficient additive, affording the desired product **2a** in 93% yield (Table S1, entries 2-6). After solvent screening (Table S1, entries 6-8), dichloromethane (DCM) was found to be the suitable solvent, furnishing the desired product **2a** in 93% yield at 20 °C. Under similar conditions, the use of acetonitrile did not afford any desired product, while nitromethane gave the product in a lower yield (80%). Gratifyingly, the different products **2a** or **3a** could be obtained in excellent or good yield by adjusting the stoichiometry of TfOH (Table S1). When 1.0 equivalent of TfOH was used, the yield of **2a** was significantly decreased (Table S1, entry 9). It was ascertained that when the amount of TfOH was increased to 4.0 and even 6.0 equivalents, the yield of **3a** could be increased to 81% (Table S1, entries 10-11).

**Table S1. Optimization study on Friedel-Crafts/Prins-type cyclization reaction<sup>a</sup>**

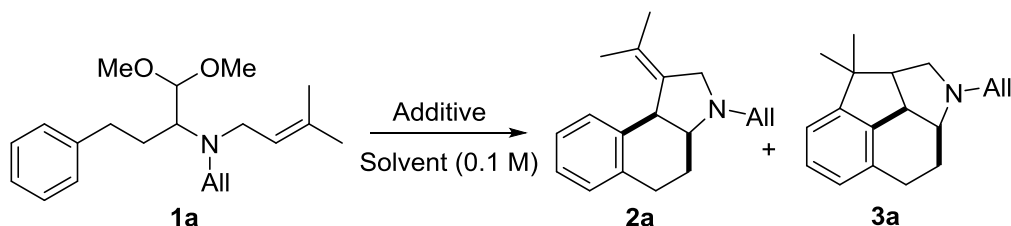

| entry    | additive (equiv.)                    | solvent         | T (°C)    | t (h)     | yield (%) <sup>b</sup> |              |
|----------|--------------------------------------|-----------------|-----------|-----------|------------------------|--------------|
|          |                                      |                 |           |           | <b>2a</b>              | <b>3a</b>    |
| 1        | —                                    | DCM             | 20        | 24        | 0                      | 0            |
| 2        | $\text{AlCl}_3$ (2.0)                | DCM             | 20        | 24        | 0                      | 0            |
| 3        | $\text{FeCl}_3$ (2.0)                | DCM             | 20        | 24        | trace                  | 0            |
| 4        | $\text{BF}_3\cdot\text{OEt}_2$ (2.0) | DCM             | 20        | 24        | 0                      | 0            |
| 5        | TFA (2.0)                            | DCM             | 20        | 24        | 0                      | 0            |
| <b>6</b> | <b>TfOH (2.0)</b>                    | <b>DCM</b>      | <b>20</b> | <b>12</b> | <b>93</b>              | <b>trace</b> |
| 7        | TfOH (2.0)                           | $\text{MeNO}_2$ | 20        | 12        | 80                     | 0            |
| 8        | TfOH (2.0)                           | MeCN            | 20        | 12        | trace                  | 0            |
| 9        | TfOH (1.0)                           | DCM             | 20        | 24        | trace                  | 0            |
| 10       | TfOH (4.0)                           | DCM             | 40        | 24        | 61                     | 32           |
| 11       | TfOH (6.0)                           | DCM             | 20        | 24        | 11                     | 81           |

<sup>a</sup>Unless otherwise noted, the reactions were carried out using  $\alpha$ -amino acetal **1a** (0.1 mmol, 1.0 equiv.), additive (2.0 equiv.), solvent (1.0 mL). <sup>b</sup>Isolated yields based on  $\alpha$ -amino acetal **1a**. All = allyl.

In a word, after our initial optimization studies, trifluoromethanesulfonic acid (TfOH) was identified as the optimal mediator for intramolecular Friedel-Crafts/Prins-type cyclization reaction of  $\alpha$ -amino acetals at 20 °C in DCM, with the use of 2.0 equivalents for the selective formation of product **2a** in 93% yield and 6.0 equivalents for the formation of product **3a** in 81% yield.

#### **4. General Experimental Procedure for the Construction of Aza-Polycyclic Frameworks with *endo* or *exo*-Cyclic Double Bond and Spectroscopic Information**

Typical procedure for intramolecular Friedel-Crafts/Prins-type cyclization reaction of  $\alpha$ -amino acetals (*N*-allyl-*N*-(1,1-dimethoxy-4-phenylbutan-2-yl)-3-methylbut-2-en-1-amine **1a** as a model substrate): Trifluoromethanesulfonic acid (30 mg, 0.2 mmol, 2.0 equiv.) was added to  $\alpha$ -amino acetal **1a** (31.7 mg, 0.1 mmol, 1.0 equiv.) in dry dichloromethane (1.0 ml) at 20 °C and was stirred at 20 °C for the specified time. The reaction mixture was quenched with saturated aqueous sodium bicarbonate (NaHCO<sub>3</sub>). The aqueous layer was extracted with dichloromethane (2.0 ml  $\times$  3) and the combined organic layers were washed with brine, dried over anhydrous sodium sulfate and concentrated under reduced pressure. The crude oil was redissolved in a minimum amount of dichloromethane and was purified by flash column chromatography (silica gel; triethylamine/ethyl acetate/hexane = 0.1:1:10) to afford the desired product **2a** as the light yellow oil (23.6 mg, 93%). Then the product **2a** was dissolved in dichloromethane, hexane was added into it and solvent was evaporated to obtain the crystal (CCDC 965133).

#### **3-allyl-1-(propan-2-ylidene)-2,3,3a,4,5,9b-hexahydro-1*H*-benzo[*e*]indole (**2a**):**

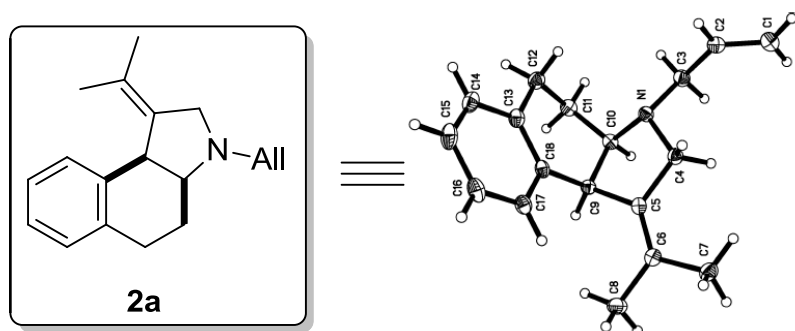

$R_f$  = 0.60 (hexane: ethyl acetate = 3:1);  $^1\text{H}$  NMR ( $\text{CDCl}_3$ , 400 MHz)  $\delta$  7.20-7.09 (m, 4H), 5.94-5.84 (m, 1H), 5.18 (d,  $J$  = 17.19 Hz, 1H), 5.06 (d,  $J$  = 10.12 Hz, 1H), 3.68 (d,  $J$  = 5.75 Hz, 1H), 3.64 (d,  $J$  = 13.94 Hz, 1H), 3.48 (dd,  $J$  = 13.58, 5.17 Hz, 1H), 2.98-2.77 (m, 4H), 2.60-2.53 (m, 1H), 2.06-1.97 (m, 1H), 1.87 (s, 3H), 1.75-1.67 (m, 4H) ppm;  $^{13}\text{C}$  NMR ( $\text{CDCl}_3$ , 100 MHz)  $\delta$  138.2, 137.7, 135.9, 133.4, 127.84, 127.77, 125.9, 125.6, 123.7, 116.5, 62.6, 56.7, 56.4, 44.8, 26.2, 25.3, 22.4, 20.6 ppm; HRMS (ESI,  $m/z$ ): calcd for  $\text{C}_{18}\text{H}_{24}\text{N}^+$   $[\text{M}+\text{H}]^+$  254.1909, found: 254.1909.

**1-allyl-3,3-dimethyl-1,2,2a,2a<sup>1</sup>,3,7,8,8a-octahydroindeno[2,1,7-*cde*]indole (3a):**

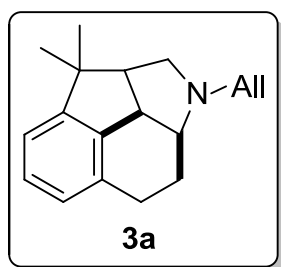

This compound was prepared by the general procedure described above except that trifluoromethanesulfonic acid (6.0 equiv.) was used in the reaction and was obtained as light yellow oil in 81% yield:  $R_f$  = 0.36 (hexane: ethyl acetate: triethylamine = 3:1:0.1);  $^1\text{H}$  NMR ( $\text{CDCl}_3$ , 400 MHz)  $\delta$  7.16-7.12 (m, 1H), 6.95 (d,  $J$  = 7.43 Hz, 2H), 5.88-5.78 (m, 1H), 5.12 (d,  $J$  = 17.13 Hz, 1H), 5.04 (d,  $J$  = 10.14 Hz, 1H), 3.52-3.48 (m, 1H), 3.38-3.32 (m, 1H), 3.22-3.17 (m, 1H), 2.94-2.89 (m, 1H), 2.74-2.68 (m, 1H), 2.60-2.45 (m, 4H), 2.15-2.08 (m, 1H), 1.34 (s, 3H), 1.26 (s, 3H), 1.14-1.05 (m, 1H) ppm;  $^{13}\text{C}$  NMR ( $\text{CDCl}_3$ , 100 MHz)  $\delta$  150.1, 141.8, 138.2, 136.6, 127.1, 123.1, 119.6, 116.3, 61.4, 55.8, 55.4, 53.6, 46.33, 46.27, 31.6, 27.9, 27.4, 23.5 ppm; HRMS (ESI,  $m/z$ ): calcd for  $\text{C}_{18}\text{H}_{24}\text{N}^+$   $[\text{M}+\text{H}]^+$  254.1909, found: 254.1912.

**3-allyl-6-methyl-1-(propan-2-ylidene)-2,3,3a,4,5,9b-hexahydro-1*H*-benzo[*e*]indole (2b):**

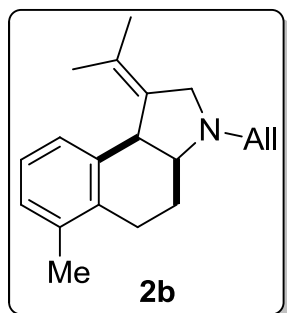

This compound was prepared by the general procedure described above and was obtained as light yellow oil in 82% yield:  $R_f$  = 0.63 (hexane: ethyl acetate = 3:1);  $^1\text{H}$  NMR ( $\text{CDCl}_3$ , 400 MHz)  $\delta$  7.10-6.98 (m, 3H), 5.96-5.86 (m, 1H), 5.19 (d,  $J$  = 17.14 Hz, 1H), 5.07 (d,  $J$  = 10.14 Hz, 1H), 3.72 (d,  $J$  = 5.26 Hz, 1H), 3.61 (d,  $J$  = 13.74 Hz, 1H), 3.49 (dd,  $J$  = 13.59, 5.15 Hz, 1H), 3.95-3.92 (m, 2H), 2.86-2.74 (m, 2H), 2.53-2.47 (m, 1H), 2.27 (s, 3H), 2.00-1.81 (m, 4H), 1.68 (s, 3H) ppm;  $^{13}\text{C}$  NMR ( $\text{CDCl}_3$ , 100 MHz)  $\delta$  137.6, 136.1, 136.0, 135.1, 134.2, 127.3, 125.9, 125.2, 123.2, 116.5, 62.2, 56.7, 56.5, 45.1, 24.3, 22.4, 22.2, 20.6, 19.8 ppm; HRMS (ESI,  $m/z$ ): calcd for  $\text{C}_{19}\text{H}_{26}\text{N}^+$   $[\text{M}+\text{H}]^+$  268.2056, found: 268.2064.

**3-allyl-8-methoxy-1-(propan-2-ylidene)-2,3,3a,4,5,9b-hexahydro-1H-benzo[*e*]indole (2c):**

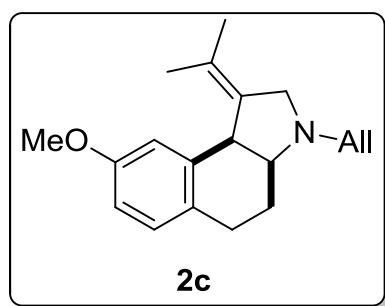

This compound was prepared by the general procedure described above and was obtained as light yellow oil in 79% yield:  $R_f$  = 0.46 (hexane: ethyl acetate = 3:1);  $^1\text{H}$  NMR ( $\text{CDCl}_3$ , 400 MHz)  $\delta$  7.01 (d,  $J$  = 8.23 Hz, 1H), 6.77 (d,  $J$  = 2.44 Hz, 1H), 6.66 (dd,  $J$  = 8.22, 2.65 Hz, 1H), 5.94-5.84 (m, 1H), 5.18 (d,  $J$  = 18.01 Hz, 1H), 5.06 (d,  $J$  = 10.09 Hz, 1H), 3.76 (s, 3H), 3.64 (d,  $J$  = 6.97 Hz, 2H), 3.47 (dd,  $J$  = 13.58, 5.17 Hz, 1H), 3.65-3.63 (m, 2H), 3.49-3.44 (m, 1H), 2.96-2.90 (m, 2H), 2.83-2.76 (m, 2H), 2.54-2.47 (m, 1H), 2.04-1.96 (m, 1H), 1.87 (s, 3H), 1.71-1.63 (m, 4H) ppm;  $^{13}\text{C}$  NMR ( $\text{CDCl}_3$ , 100 MHz)  $\delta$  157.9, 138.9, 135.8, 133.4, 130.5, 128.5, 123.8, 116.6, 113.8, 110.7, 62.6, 56.7, 56.5, 55.1, 45.0, 25.6, 25.4, 22.4, 20.6 ppm; HRMS (ESI,  $m/z$ ): calcd for  $\text{C}_{19}\text{H}_{25}\text{NO}^+$   $[\text{M}+\text{H}]^+$  284.2014, found: 284.2022.

**6-allyl-8-(propan-2-ylidene)-5,5a,6,7,8,8a-hexahydro-4H-thieno[2,3-*e*]indole (2d):**

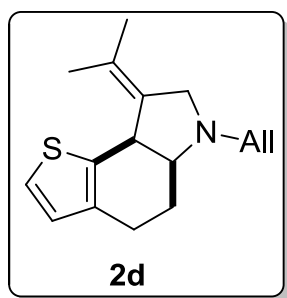

This compound was prepared by the general procedure described above and was obtained as light yellow oil in 57% yield:  $R_f$  = 0.71 (hexane: ethyl acetate = 3:1);  $^1\text{H}$  NMR ( $\text{CDCl}_3$ , 400 MHz)  $\delta$  7.03 (d,  $J$  = 5.10 Hz, 1H), 6.71 (d,  $J$  = 5.12 Hz, 1H), 5.97-5.87 (m, 1H), 5.23-5.07 (m, 2H), 3.90 (s, 1H), 3.70-3.51 (m, 2H), 2.95-2.80 (m, 3H), 2.75-2.66 (m, 1H), 2.55-2.50 (m, 1H), 2.16-2.10 (m, 1H), 1.94 (s, 3H), 1.78-1.69 (m, 1H), 1.94 (s, 3H) ppm;  $^{13}\text{C}$  NMR ( $\text{CDCl}_3$ , 100 MHz)  $\delta$  138.9, 135.9, 134.80, 134.76, 127.1, 123.0, 121.9, 116.6, 62.7, 56.9, 56.2, 43.1, 23.4, 22.5, 20.58, 20.56 ppm; HRMS (ESI,  $m/z$ ): calcd for  $\text{C}_{16}\text{H}_{22}\text{NS}^+$   $[\text{M}+\text{H}]^+$  260.1473, found: 260.1476.

**1-allyl-4-benzyl-3-(propan-2-ylidene)-2,3,3a,4,9,9a-hexahydro-1H-pyrrolo[2',3':4,5]-cyclopenta[1,2-*b*]indole (2e):**

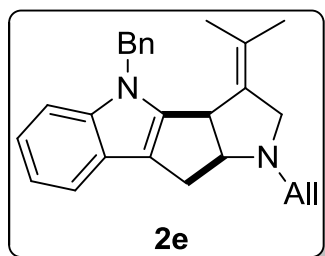

This compound was prepared by the general procedure described above except that the reaction was performed at 0 °C and was obtained as light yellow oil in 80% yield:  $R_f$  = 0.56 (hexane: ethyl acetate: triethylamine = 3:1:0.1);  $^1\text{H}$  NMR ( $\text{CDCl}_3$ , 400 MHz)  $\delta$  7.47 (d,  $J$  = 7.79 Hz, 1H), 7.25-7.16 (m, 3H), 7.08-7.00 (m, 3H), 6.92 (d,  $J$  = 7.11 Hz, 2H), 6.00-5.90 (m, 1H), 5.31 (AB<sub>q</sub>,  $J$  = 17.25 Hz, 2H), 5.21 (d,  $J$  = 17.12 Hz, 1H), 5.12 (d,  $J$  = 10.11 Hz, 1H), 4.34 (d,  $J$  = 5.47 Hz, 1H), 3.98-3.95 (m, 1H), 3.51-3.45 (m, 2H), 3.20-3.09 (m, 2H), 2.96 (s, 2H), 1.70 (s, 3H), 1.44 (s, 3H) ppm;  $^{13}\text{C}$  NMR ( $\text{CDCl}_3$ , 100 MHz)  $\delta$  144.7, 141.3, 138.4, 135.9, 131.4, 128.4 (CH x 2), 126.8, 125.4 (CH x 2), 124.7 (C x 2), 120.5, 119.3, 118.8, 117.7, 117.1, 110.0, 73.8, 57.7, 55.9, 47.4, 47.0, 29.8, 22.4, 20.8 ppm; HRMS (ESI,  $m/z$ ): calcd for  $\text{C}_{26}\text{H}_{29}\text{N}_2^+$   $[\text{M}+\text{H}]^+$  369.2311, found: 369.2325.

**3-allyl-1-benzylidene-2,3,3a,4,5,9b-hexahydro-1H-benzo[*e*]indole (2f):**

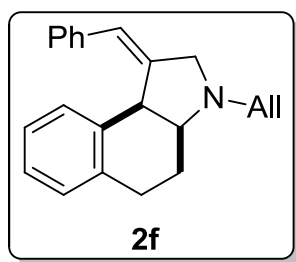

This compound was prepared by the general procedure described above and was obtained as light yellow oil in 31% yield:  $R_f$  = 0.54 (hexane: ethyl acetate = 3:1);  $^1\text{H}$  NMR ( $\text{CDCl}_3$ , 400 MHz)  $\delta$  7.37 (d,  $J$  = 7.46 Hz, 1H), 7.32-7.29 (m, 2H), 7.23-7.12 (m, 6H), 7.32 (s, 1H), 6.01-5.91 (m, 1H), 5.27 (d,  $J$  = 17.14 Hz, 1H), 5.14 (d,  $J$  = 10.17 Hz, 1H), 3.96 (d,  $J$  = 6.30 Hz, 1H), 3.84-3.80 (m, 1H), 3.58-3.54 (m, 1H), 3.50-3.46 (m, 1H), 3.27-3.23 (m, 1H), 3.20-3.15 (m, 1H), 2.96-2.88 (m, 1H), 2.65-2.58 (m, 1H), 1.85-1.74 (m, 2H) ppm;  $^{13}\text{C}$  NMR ( $\text{CDCl}_3$ , 100 MHz)  $\delta$  144.3, 137.7, 137.2, 135.9 (CH x 1 and C x 1), 129.7, 128.7, 128.3 (CH x 2), 128.2 (CH x 2), 126.3, 126.0, 125.7, 122.8, 116.8, 60.3, 55.8, 55.7, 48.8, 26.3, 22.8 ppm; HRMS (ESI,  $m/z$ ): calcd for  $\text{C}_{22}\text{H}_{24}\text{N}^+$   $[\text{M}+\text{H}]^+$  302.1909, found: 302.1916.

#### 4-allyl-2-phenyl-3,4,4a,5,6,10b-hexahydrobenzo[f]quinoline (2g):

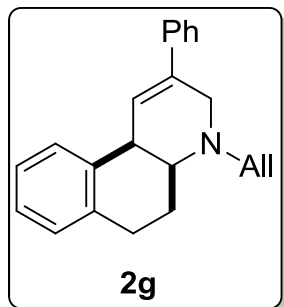

This compound was prepared by the general procedure described above and was obtained as light yellow oil in 89% yield:  $R_f$  = 0.46 (hexane: ethyl acetate = 3:1);  $^1\text{H}$  NMR ( $\text{CDCl}_3$ , 400 MHz)  $\delta$  7.34-7.26 (m, 5H), 7.23-7.19 (m, 2H), 7.15-7.07 (m, 2H), 6.08 (s, 1H), 6.03-5.93 (m, 1H), 5.29 (d,  $J$  = 17.12 Hz, 1H), 5.18 (d,  $J$  = 10.09 Hz, 1H), 3.85 (s, 1H), 3.60-3.29 (m, 5H), 2.91-2.76 (m, 2H), 1.92-1.89 (m, 1H), 1.83-1.72 (m, 1H) ppm;  $^{13}\text{C}$  NMR ( $\text{CDCl}_3$ , 100 MHz)  $\delta$  139.7, 139.1, 136.7, 136.1, 133.2, 129.3, 128.6, 128.3 (CH x 2), 127.4, 127.1, 126.3, 126.0, 125.1 (CH x 2), 117.6, 57.7, 55.4, 48.5, 40.0, 29.1, 17.6 ppm; HRMS (ESI,  $m/z$ ): calcd for  $\text{C}_{22}\text{H}_{24}\text{N}^+$   $[\text{M}+\text{H}]^+$  302.1909, found: 302.1905.

#### 4-allyl-7-methyl-2-phenyl-3,4,4a,5,6,10b-hexahydrobenzo[f]quinoline (2h):

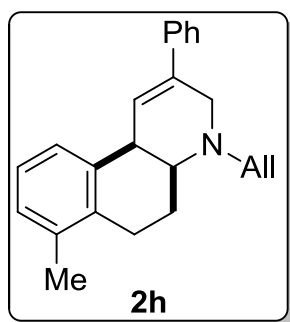

This compound was prepared by the general procedure described above and was obtained as light yellow oil in 87% yield:  $R_f$  = 0.47 (hexane: ethyl acetate = 3:1);  $^1\text{H NMR}$  ( $\text{CDCl}_3$ , 400 MHz)  $\delta$  7.35-7.33 (m, 2H), 7.29-7.25 (m, 2H), 7.23-7.12 (m, 3H), 7.02 (d,  $J$  = 7.07 Hz, 1H), 6.11 (s, 1H), 6.04-5.94 (m, 1H), 5.29 (d,  $J$  = 17.12 Hz, 1H), 5.18 (d,  $J$  = 10.11 Hz, 1H), 3.83 (s, 1H), 3.61-3.57 (m, 1H), 3.46-3.35 (m, 3H), 3.32-3.27 (m, 1H), 2.88-2.82 (m, 1H), 2.60-2.51 (m, 1H), 2.22 (s, 3H), 1.98-1.94 (m, 1H), 1.83-1.73 (m, 1H) ppm;  $^{13}\text{C NMR}$  ( $\text{CDCl}_3$ , 100 MHz)  $\delta$  139.6, 139.1, 136.2, 136.0, 135.2, 133.1, 128.3 (CH x 2), 127.6, 127.5, 127.2, 127.1, 126.1, 125.1 (CH x 2), 117.6, 57.7, 54.9, 48.5, 40.2, 26.4, 19.7, 17.5 ppm; **HRMS (ESI, m/z)**: calcd for  $\text{C}_{23}\text{H}_{26}\text{N}^+$   $[\text{M}+\text{H}]^+$  316.2065, found: 316.2061.

#### 4-allyl-9-methoxy-2-phenyl-3,4,4a,5,6,10b-hexahydrobenzo[f]quinoline (2i):

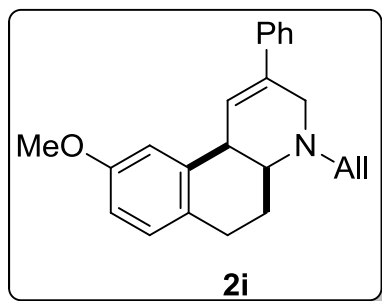

This compound was prepared by the general procedure described above and was obtained as light yellow oil in 84% yield:  $R_f$  = 0.37 (hexane: ethyl acetate = 3:1);  $^1\text{H NMR}$  ( $\text{CDCl}_3$ , 400 MHz)  $\delta$  7.35-7.19 (m, 5H), 6.99 (d,  $J$  = 8.41 Hz, 1H), 6.83 (d,  $J$  = 2.59 Hz, 1H), 6.71 (dd,  $J$  = 8.40, 2.66 Hz, 1H), 6.08 (s, 1H), 6.03-5.93 (m, 1H), 5.28 (d,  $J$  = 17.11 Hz, 1H), 5.18 (d,  $J$  = 10.11 Hz, 1H), 3.81 (s, 4H), 3.60-3.55 (m, 1H), 3.45-3.34 (m, 3H), 3.32-3.27 (m, 1H), 2.85-2.68 (m, 2H), 1.91-1.86 (m, 1H), 1.80-1.70 (m, 1H) ppm;  $^{13}\text{C NMR}$  ( $\text{CDCl}_3$ , 100 MHz)  $\delta$  158.1, 140.3, 139.6, 136.0, 133.4, 129.5, 128.8, 128.3 (CH x 2), 127.2, 127.1, 125.1 (CH x 2), 117.6, 113.9, 112.3, 57.7, 55.4, 55.3, 48.5, 40.3, 28.3, 17.9 ppm; **HRMS (ESI, m/z)**: calcd for  $\text{C}_{23}\text{H}_{26}\text{NO}^+$   $[\text{M}+\text{H}]^+$  332.2014, found: 332.2018.

#### 4-allyl-2-phenyl-3,4,4a,5,6,12c-hexahydronaphtho[1,2-f]quinoline (2j):

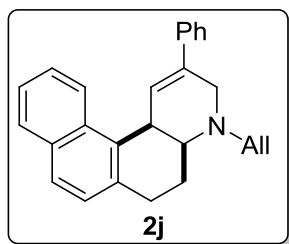

This compound was prepared by the general procedure described above and was obtained as light yellow oil in 71% yield:  $R_f$  = 0.3 (hexane: ethyl acetate: triethylamine = 10:1:0.1);  $^1\text{H NMR}$  ( $\text{CDCl}_3$ , 400 MHz)  $\delta$  8.13 (d,  $J$  = 8.5 Hz, 1H), 7.83 (dd,  $J$  = 8.1, 1.8 Hz, 1H), 7.65 (dd,  $J$  = 8.5, 1.7 Hz, 1H), 7.56-7.51 (m, 1H), 7.48-7.43 (m, 1H), 7.34 – 7.28 (m, 2H), 7.26 – 7.16 (m, 4H), 6.23 (t,  $J$  = 2.2 Hz, 1H), 6.09 – 5.93 (m, 1H), 5.36-5.30 (m, 1H), 5.23-5.19 (m, 1H), 4.52 (s, 1H), 3.77-3.71 (m, 1H), 3.57 – 3.35 (m, 4H), 3.15 – 2.93 (m, 2H), 2.05 – 1.81 (m, 2H).;  $^{13}\text{C NMR}$  ( $\text{CDCl}_3$ , 100 MHz)  $\delta$  139.61, 136.10, 133.96, 133.84, 133.04, 132.84, 131.77, 129.01, 128.40, 127.69, 127.34, 126.86, 126.39, 125.96, 125.32, 124.99, 123.36, 117.96, 58.09, 55.60, 49.16, 36.99, 30.17, 16.60 ppm; **HRMS (ESI, m/z)**: calcd for  $\text{C}_{23}\text{H}_{26}\text{N}^+$   $[\text{M}+\text{H}]^+$  352.2065, found: 352.2061.

#### 6-allyl-8-phenyl-4,5,5a,6,7,9a-hexahydrothieno[2,3-*f*]quinoline (2k):

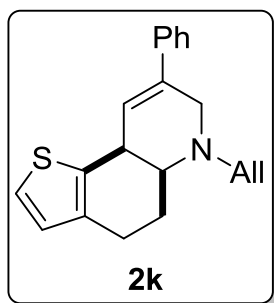

This compound was prepared by the general procedure described above and was obtained as light yellow oil in 85% yield:  $R_f$  = 0.50 (hexane: ethyl acetate = 3:1);  $^1\text{H NMR}$  ( $\text{CDCl}_3$ , 400 MHz)  $\delta$  7.35-7.21 (m, 5H), 6.92 (dd,  $J$  = 159.19, 5.07 Hz, 2H), 6.10 (s, 1H), 6.02-5.92 (m, 1H), 5.28 (d,  $J$  = 17.09 Hz, 1H), 5.18 (d,  $J$  = 10.08 Hz, 1H), 3.91 (s, 1H), 3.56-3.32 (m, 5H), 2.81-2.75 (m, 1H), 2.63-2.55 (m, 1H), 1.94-1.77 (m, 2H) ppm;  $^{13}\text{C NMR}$  ( $\text{CDCl}_3$ , 100 MHz)  $\delta$  139.5, 137.9, 135.8, 135.4, 133.2, 128.3 (CH x 2), 127.3, 127.0, 126.0, 125.1 (CH x 2), 123.1, 117.7, 57.7, 55.9, 48.5, 36.5, 24.6, 18.6 ppm; **HRMS (ESI, m/z)**: calcd for  $\text{C}_{20}\text{H}_{22}\text{NS}^+$   $[\text{M}+\text{H}]^+$  308.1473, found: 308.1473.

#### 4-allyl-11-benzyl-2-phenyl-4,4a,5,6,11,11b-hexahydro-3*H*-pyrido[3,2-*a*]carbazole (2l):



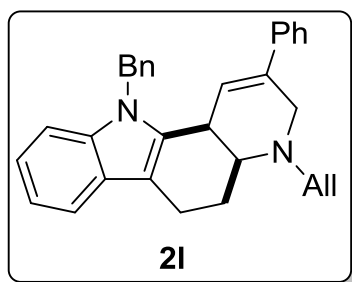

This compound was prepared by the general procedure described above except that the reaction was performed at 0 °C and was obtained as light yellow oil in 70% yield:  $R_f$  = 0.50 (hexane: ethyl acetate: triethylamine = 3:1:0.1);  $^1\text{H NMR}$  ( $\text{CDCl}_3$ , 400 MHz)  $\delta$  7.51 (d,  $J$  = 6.94 Hz, 1H), 7.30-7.07 (m, 11H), 7.00 (d,  $J$  = 6.50 Hz, 2H), 6.01-5.91 (m, 1H), 5.88 (s, 1H), 5.42 (AB<sub>q</sub>,  $J$  = 17.21 Hz, 2H), 5.27 (d,  $J$  = 17.08 Hz, 1H), 5.17 (d,  $J$  = 10.11 Hz, 1H), 3.91 (s, 1H), 3.64-3.60 (m, 1H), 3.48-3.34 (m, 4H), 2.98-2.93 (m, 1H), 2.74-2.66 (m, 1H), 2.04-2.00 (m, 1H), 1.91-1.80 (m, 1H) ppm;  $^{13}\text{C NMR}$  ( $\text{CDCl}_3$ , 100 MHz)  $\delta$  139.0, 138.1, 137.5, 135.88, 135.86, 133.7, 128.8 (CH x 2), 128.2 (CH x 2), 127.24, 127.21, 126.8, 126.0 (CH x 2), 124.9 (C x 2), 122.4, 121.4, 119.2, 118.2, 117.8, 110.3, 109.4, 58.1, 56.3, 48.5, 46.4, 34.4, 20.0, 17.4 ppm; **HRMS (ESI, m/z)**: calcd for  $\text{C}_{31}\text{H}_{31}\text{N}_2^+$   $[\text{M}+\text{H}]^+$  431.2487, found: 431.2482.

#### 4-allyl-2-methyl-3,4,4a,5,6,10b-hexahydrobenzo[f]quinoline (2m):

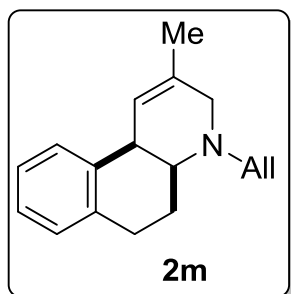

This compound was prepared by the general procedure described above and was obtained as light yellow oil in 65% yield:  $R_f$  = 0.39 (hexane: ethyl acetate = 3:1);  $^1\text{H NMR}$  ( $\text{CDCl}_3$ , 400 MHz)  $\delta$  7.23-7.05 (m, 4H), 5.99-5.89 (m, 1H), 5.42 (s, 1H), 5.25 (d,  $J$  = 17.13 Hz, 1H), 5.15 (d,  $J$  = 10.09 Hz, 1H), 3.67 (s, 1H), 3.36-3.19 (m, 3H), 3.04-2.62 (m, 4H), 1.85-1.80 (m, 1H), 1.75-1.66 (m, 1H), 1.63 (s, 3H) ppm;  $^{13}\text{C NMR}$  ( $\text{CDCl}_3$ , 100 MHz)  $\delta$  139.8, 136.4, 136.2, 130.3, 129.2, 128.5, 126.1, 125.8, 124.6, 117.3, 57.6, 55.4, 51.1, 39.8, 29.1, 20.6, 17.0 ppm; **HRMS (ESI, m/z)**: calcd for  $\text{C}_{17}\text{H}_{22}\text{N}^+$   $[\text{M}+\text{H}]^+$  240.1752, found: 240.1752.

## 5. General Experimental Procedure for Gram-Scale Reaction

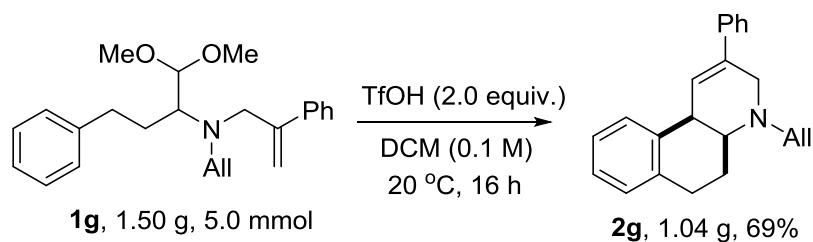

Typical procedure for the gram scale reaction (*N*-allyl-1,1-dimethoxy-4-phenyl-*N*-(2-phenylallyl)butan-2-amine **1g** as a model example): Trifluoromethanesulfonic acid (10 mmol, 2.0 equiv.) was dropwise added to  $\alpha$ -amino acetal **1g** (1.50 g, 5.0 mmol, 1.0 equiv.) in dry dichloromethane (50 ml) in 2 h at 20 °C and was then stirred at 20 °C for the specified time. The reaction mixture was quenched with saturated aqueous sodium bicarbonate (NaHCO<sub>3</sub>). The aqueous layer was extracted with dichloromethane (20 ml  $\times$  3) and the combined organic layers were washed with brine, dried over anhydrous sodium sulfate and concentrated under reduced pressure. The crude oil was redissolved in a minimum amount of dichloromethane and was purified by flash column chromatography (silica gel; triethylamine/ethyl acetate/hexane = 0.1:1:10) to afford the desired product **2g** as the light yellow oil (1.04 g, 69%).

## 6. Experimental Procedure for Formal Synthesis of Homochelidonine and Chelamidine and Spectroscopic Information<sup>11-12</sup>

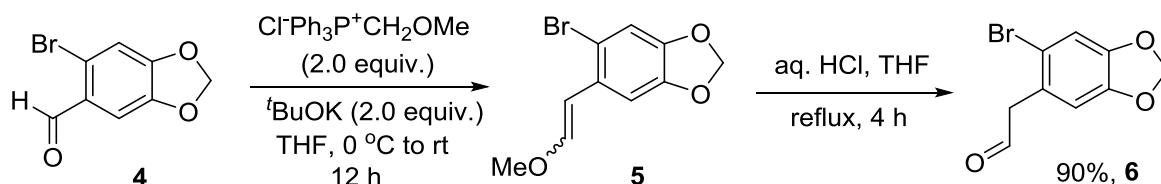

*t*-BuOK (3.07 g, 27.3 mmol) was added in portions to an ice-cooled and magnetically stirred suspension of methoxymethyltriphenylphosphonium chloride (4.49 g, 13.1 mmol) in anhydrous THF (25 mL) maintained under an atmosphere of nitrogen. The resulting dark-red suspension was then stirred for 0.5 h at ca. 0 °C. A solution of 6-bromopiperonal **4** (2.50 g, 10.9 mmol) in THF (25 mL) was then added slowly and the subsequent mixture was allowed to warm to 20 °C and stirred for 16 h. After that, NH<sub>4</sub>Cl (25 mL of a saturated aqueous solution) then water (10 mL) were successively added. The reaction mixture was extracted with Et<sub>2</sub>O (3  $\times$  40 mL) and the combined organic phases washed with brine (25 mL) before being dried (Na<sub>2</sub>SO<sub>4</sub>), filtered and concentrated to give a light orange-colored oil **5**.

Next, the mixture of the intermediate **5**, aqueous HCl (4 mL, 2 M), and THF (25 mL) was stirred and refluxed for 4 h and cooled and extracted with Et<sub>2</sub>O (3 x 50 mL). The combined organic extracts were washed with water (20 mL) and NaHCO<sub>3</sub> (25 mL of a saturated aqueous solution), then dried (Na<sub>2</sub>SO<sub>4</sub>), filtered, concentrated, and subjected to flash chromatography (silica, 5:95 v/v ethyl acetate/hexane elution) to give the title compound **6** (2.38 g, 90%) as the light yellow oil.

## 2-(6-bromobenzo[d][1,3]dioxol-5-yl)acetaldehyde (**6**):

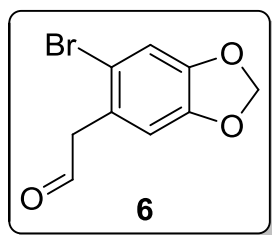

Light yellow oil;  $R_f$  = 0.60 (hexane: ethyl acetate = 4:1); <sup>1</sup>H NMR (CDCl<sub>3</sub>, 500 MHz)  $\delta$  9.67 (t,  $J$  = 1.64 Hz, 1H), 7.02 (s, 1H), 6.68 (s, 1H), 5.96 (s, 2H), 3.73 (d,  $J$  = 1.68 Hz, 2H) ppm; <sup>13</sup>C NMR (CDCl<sub>3</sub>, 125 MHz)  $\delta$  198.2, 147.7, 147.4, 125.0, 115.0, 112.5, 110.8, 101.7, 50.0 ppm; HRMS (ESI,  $m/z$ ): calcd for C<sub>9</sub>H<sub>8</sub>BrO<sub>3</sub><sup>+</sup> [M+H]<sup>+</sup> 242.9657, found: 242.9658.

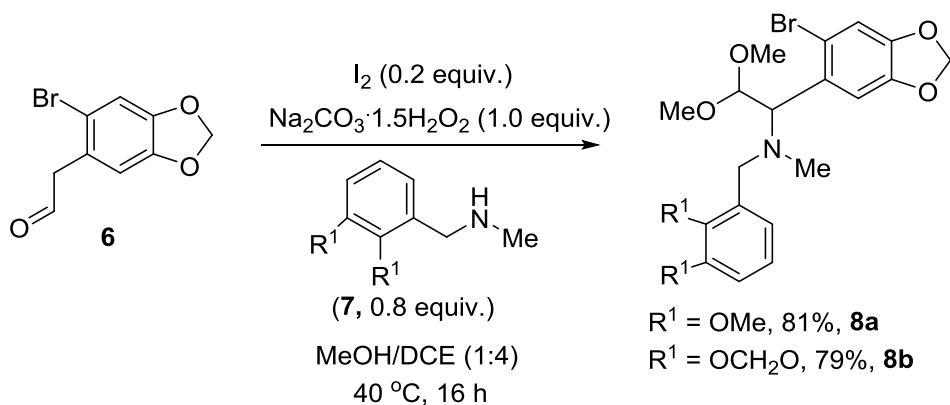

Iodine (25 mg, 0.1 mmol) was added to a mixture of sodium percarbonate (79 mg, 0.5 mmol), secondary amine **7** (0.5 mmol), and aldehyde **6** (0.625 mmol) in methanol (0.5 mL)/1,2-dichloroethane (2.0 mL) at room temperature. The mixture was stirred at 40 °C until secondary amine was completely converted by TLC detection. The resulting reaction mixture was mixed with a small amount of silica gel and concentrated. The crude product was purified by flash column chromatography (silica gel; ethyl acetate or diethyl ether/hexane = 1:100, v/v) to afford the corresponding desired product **8**.

**1-(6-bromobenzo[*d*][1,3]dioxol-5-yl)-*N*-(2,3-dimethoxybenzyl)-2,2-dimethoxy-*N*-methylethanamine (8a):**

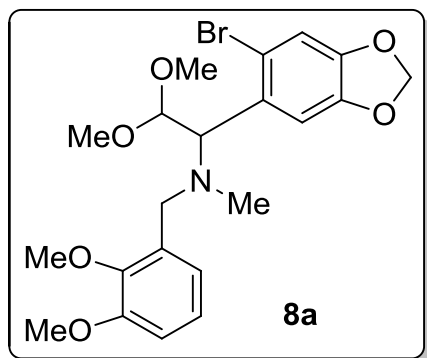

81% yield; Light yellow oil;  $R_f$  = 0.30 (hexane: ethyl acetate = 4:1);  $^1\text{H NMR}$  ( $\text{CDCl}_3$ , 400 MHz)  $\delta$  7.14 (s, 1H), 7.07-6.99 (m, 3H), 6.80-6.77 (m, 1H), 5.97-5.95 (m, 2H), 4.74 (d,  $J$  = 5.70 Hz, 1H), 4.34 (d,  $J$  = 5.70 Hz, 1H), 3.84 (s, 3H), 3.77 (s, 3H), 3.66 (AB<sub>q</sub>,  $J$  = 13.44 Hz, 2H), 3.50 (s, 3H), 3.33 (s, 3H), 2.22 (s, 3H) ppm;  $^{13}\text{C NMR}$  ( $\text{CDCl}_3$ , 100 MHz)  $\delta$  152.4, 147.4, 147.2, 146.8, 133.4, 130.6, 123.6, 122.1, 116.7, 112.3, 110.6, 110.1, 105.2, 101.5, 67.4, 60.5, 55.6, 55.1, 54.2, 52.2, 38.7 ppm; HRMS (ESI,  $m/z$ ): calcd for  $\text{C}_{21}\text{H}_{27}\text{BrNO}_6^+$   $[\text{M}+\text{H}]^+$  468.1022, found: 468.1011.

***N*-(benzo[*d*][1,3]dioxol-4-ylmethyl)-1-(6-bromobenzo[*d*][1,3]dioxol-5-yl)-2,2-dimethoxy-*N*-methylethanamine (8b):**

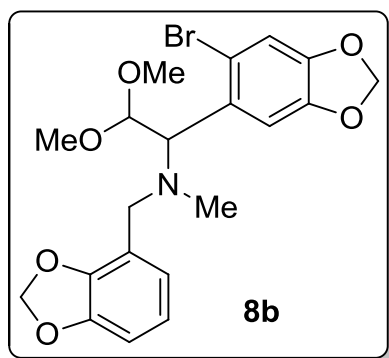

79% yield; Light yellow oil;  $R_f$  = 0.36 (hexane: ethyl acetate = 4:1);  $^1\text{H NMR}$  ( $\text{CDCl}_3$ , 400 MHz)  $\delta$  7.11 (s, 1H), 7.03 (s, 1H), 6.88-6.69 (m, 3H), 5.98-5.96 (m, 2H), 5.93-5.90 (m, 2H), 4.72 (d,  $J$  = 5.69 Hz, 1H), 4.33 (d,  $J$  = 5.68 Hz, 1H), 3.58 (AB<sub>q</sub>,  $J$  = 13.41 Hz, 2H), 3.49 (s, 3H), 3.32 (s, 3H), 2.25 (s, 3H) ppm;  $^{13}\text{C NMR}$  ( $\text{CDCl}_3$ , 100 MHz)  $\delta$  147.4, 147.0 (C x 2), 145.9, 130.3, 123.0, 121.2, 120.9, 116.8, 112.5, 110.2, 107.0, 105.2, 101.7, 100.5, 67.1, 55.3, 54.3, 52.3, 38.7 ppm; HRMS (ESI,  $m/z$ ): calcd for  $\text{C}_{20}\text{H}_{23}\text{BrNO}_6^+$   $[\text{M}+\text{H}]^+$  452.0709, found: 452.0703.

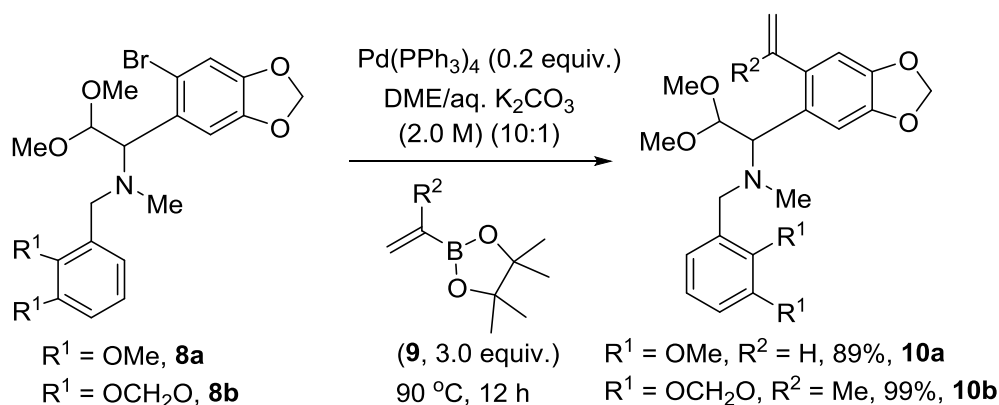

To a 50 mL round-bottom flask with a magnetic stirring bar was added aryl bromide **8** (0.5 mmol, 1.0 equiv.), boronic acid pinacol ester **9** (1.5 mmol, 3.0 equiv.),  $\text{Pd(PPh}_3)_4$  (0.1 mmol, 0.2 equiv.),  $\text{K}_2\text{CO}_3$  (2.5 mL, 2 M, 5.0 mmol, 10 equiv.) and 1,2-dimethoxyethane (25 mL). The reaction mixture was refluxed for 12 h. Then, water (20 mL) was added to quench the reaction and the aqueous layer was extracted with ethyl acetate (3 x 30 mL). The combined organic extracts were washed with water (20 mL), brine (20 mL) and dried over anhydrous  $\text{Na}_2\text{SO}_4$ . After being filtered and concentrated, the residual crude product was purified by flash column chromatography to afford the desired compound **10**.

***N*-(2,3-dimethoxybenzyl)-2,2-dimethoxy-*N*-methyl-1-(6-vinylbenzo[*d*][1,3]dioxol-5-yl)ethanamine (10a):**

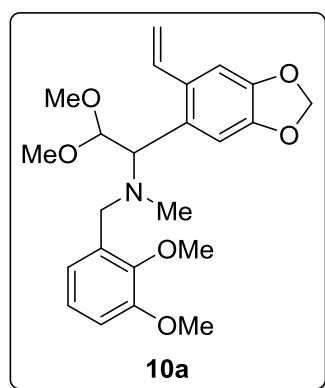

89% yield; Light yellow oil;  $R_f$  = 0.55 (hexane: ethyl acetate = 1:1);  $^1\text{H NMR}$  ( $\text{CDCl}_3$ , 400 MHz)  $\delta$  7.11-6.99 (m, 4H), 6.97 (s, 1H), 6.78 (dd,  $J$  = 7.30, 2.33 Hz, 1H), 5.95-5.93 (m, 2H), 5.48 (dd,  $J$  = 17.21, 1.33 Hz, 1H), 5.19 (dd,  $J$  = 10.88, 1.32 Hz, 1H), 4.79 (d,  $J$  = 5.97 Hz, 1H), 4.08 (d,  $J$  = 5.99 Hz, 1H), 3.84 (s, 3H), 3.75 (s, 3H), 3.62 (AB<sub>q</sub>,  $J$  = 13.64 Hz, 2H), 3.47 (s, 3H), 3.28 (s, 3H), 2.20 (s, 3H) ppm;  $^{13}\text{C NMR}$  ( $\text{CDCl}_3$ , 100 MHz)  $\delta$  152.5, 147.5, 146.8, 146.6, 135.2, 133.7, 132.6, 130.0, 123.7, 122.1, 114.7, 110.6, 109.0, 106.0,

105.5, 100.9, 64.5, 60.6, 55.7, 55.0, 54.4, 52.4, 38.9 ppm; **HRMS (ESI, m/z)**: calcd for  $C_{23}H_{30}NO_6^+$   $[M+H]^+$  416.2073, found: 416.2070.

***N*-(benzo[d][1,3]dioxol-4-ylmethyl)-2,2-dimethoxy-*N*-methyl-1-(6-(prop-1-en-2-yl)benzo[d][1,3]dioxol-5-yl)ethanamine (10b):**

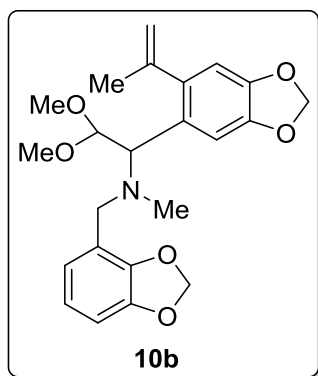

99% yield; Light yellow oil;  $R_f$  = 0.38 (hexane: ethyl acetate = 4:1);  **$^1H$  NMR (CDCl<sub>3</sub>, 400 MHz)**  $\delta$  7.08 (s, 1H), 6.88-6.68 (m, 3H), 6.63 (s, 1H), 5.95-5.90 (m, 4H), 5.05 (d,  $J$  = 121.68 Hz, 2H), 4.69 (d,  $J$  = 5.83 Hz, 1H), 4.16 (d,  $J$  = 5.84 Hz, 1H), 3.51 (AB<sub>q</sub>,  $J$  = 13.28 Hz, 2H), 3.46 (s, 3H), 3.34 (s, 3H), 2.17 (s, 3H), 2.04 (s, 3H) ppm;  **$^{13}C$  NMR (CDCl<sub>3</sub>, 100 MHz)**  $\delta$  146.9, 146.04, 146.00, 145.9, 145.2, 139.0, 128.1, 122.9, 121.5, 122.2, 116.3, 108.7, 108.0, 106.8, 106.2, 100.9, 100.5, 64.7, 56.1, 54.2, 52.3, 38.8, 25.6 ppm; **HRMS (ESI, m/z)**: calcd for  $C_{23}H_{28}NO_6^+$   $[M+H]^+$  414.1917, found: 414.1915.

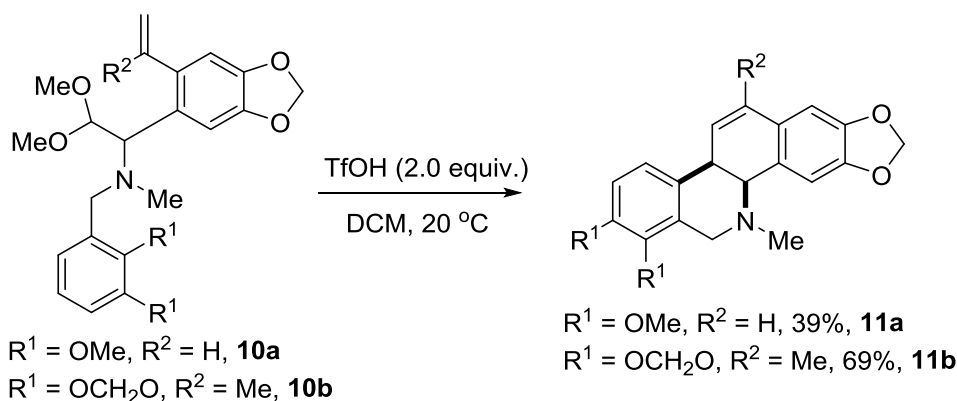

Trifluoromethanesulfonic acid (30 mg, 0.2 mmol, 2.0 equiv.) was added to  $\alpha$ -amino acetal **10** (0.1 mmol, 1.0 equiv.) in dry dichloromethane (1.0 ml) and was stirred at 20 °C for the specified time. The reaction mixture was quenched with saturated aqueous sodium bicarbonate (NaHCO<sub>3</sub>). The aqueous layer was extracted with dichloromethane (2.0 ml  $\times$  3) and the combined organic layers were washed with brine, dried over anhydrous sodium sulfate and concentrated under reduced pressure. The crude oil was redissolved in a

minimum amount of dichloromethane and was purified by flash column chromatography (silica gel; triethylamine/ethyl acetate/hexane = 0.1:1:10) to afford the desired product **11**.

**1,2-dimethoxy-12-methyl-4b,11b,12,13-tetrahydro-[1,3]dioxolo[4',5':4,5]benzo[1,2-c]phenanthridine (11a):**

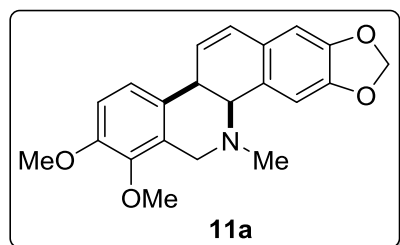

39% yield; Light yellow oil;  $R_f$  = 0.38 (hexane: ethyl acetate = 1:1);  $^1\text{H NMR}$  ( $\text{CDCl}_3$ , 400 MHz)  $\delta$  6.98-6.85 (m, 2H), 6.79 (s, 1H), 6.64 (s, 1H), 6.36 (dd,  $J$  = 9.46, 3.01 Hz, 1H), 5.96-5.95 (m, 2H), 5.79 (d,  $J$  = 9.45 Hz, 1H), 3.86 (s, 3H), 3.83 (s, 3H), 3.78 (AB<sub>q</sub>,  $J$  = 16.26 Hz, 2H), 3.71 (s, 1H), 3.31 (d,  $J$  = 4.83 Hz, 1H), 2.17 (s, 3H) ppm;  $^{13}\text{C NMR}$  ( $\text{CDCl}_3$ , 100 MHz)  $\delta$  150.5, 147.4, 146.0, 144.9, 132.6, 129.5, 128.7, 128.2, 127.2, 125.3, 123.4, 111.4 (C x 2), 106.8, 101.0, 62.4, 60.1, 55.8, 53.7, 42.8, 39.0 ppm; HRMS (ESI,  $m/z$ ): calcd for  $\text{C}_{21}\text{H}_{22}\text{NO}_4^+$   $[\text{M}+\text{H}]^+$  352.1549, found: 352.1560.

**7,13-dimethyl-5b,12b,13,14-tetrahydro-[1,3]dioxolo[4',5':4,5]benzo[1,2-c][1,3]dioxolo[4,5-*i*]phenanthridine (11b):**

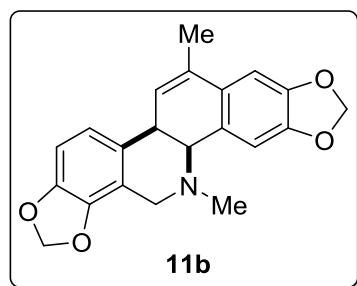

69% yield; Light yellow oil;  $R_f$  = 0.52 (hexane: ethyl acetate = 1:1);  $^1\text{H NMR}$  ( $\text{CDCl}_3$ , 400 MHz)  $\delta$  6.85 (s, 1H), 6.81 (s, 1H), 6.76-6.71 (m, 2H), 5.97-5.92 (m, 4H), 5.59 (s, 1H), 3.70 (AB<sub>q</sub>,  $J$  = 15.74 Hz, 2H), 3.69-3.68 (m, 1H), 3.32 (d,  $J$  = 4.67 Hz, 1H), 2.16 (s, 3H), 2.04-2.03 (m, 3H) ppm;  $^{13}\text{C NMR}$  ( $\text{CDCl}_3$ , 100 MHz)  $\delta$  147.6, 145.7, 145.1, 143.1, 131.0, 130.0, 129.8, 129.4, 127.7, 120.7, 116.9, 111.3, 107.3, 104.2, 101.1, 101.0, 63.0, 52.8, 42.7, 39.0, 19.4 ppm; HRMS (ESI,  $m/z$ ): calcd for  $\text{C}_{21}\text{H}_{20}\text{NO}_4^+$   $[\text{M}+\text{H}]^+$  350.1392, found: 350.1382.

---

## 7. Reference:

- [1] P. S. Baran, E. J. Corey, *J. Am. Chem. Soc.*, 2002, **124**, 7904.
- [2] S. Yu, C. Rabalakos, W. D. Mitchell, W. D. Wulff, *Org. Lett.*, 2005, **7**, 367.
- [3] C. R. Smith, T. V. RajanBabu, *Org. Lett.*, 2008, **10**, 1657.
- [4] S. Mukherjee, B. List, *J. Am. Soc. Chem.*, 2007, **129**, 11336.
- [5] S.-K. Xiang, B. Zhang, L.-H. Zhang, Y. Cui, N. Jiao, *Chem. Commun.*, 2011, **47**, 8097.
- [6] N. T. Jui, E. C. Y. Lee, D. W. C. MacMillan, *J. Am. Chem. Soc.*, 2010, **132**, 10015.
- [7] M. S. C. Pedras, Z. Minic, P. D. Thongbam, V. Bhaskar, S. Montaut, *Phytochemistry* 2010, **71**, 1952.
- [8] R. J. Blade, J. E. Robinson, *Tetrahedron Lett.*, 1986, **27**, 3209.
- [9] J.-S. Tian, T.-P. Loh, *Chem. Commun.*, 2011, **47**, 5458.
- [10] J.-S. Tian, K. W. J. Ng, J.-R. Wong, T.-P. Loh, *Angew. Chem. Int. Ed.*, 2012, **51**, 9105.
- [11] P. C. Stanislowski, A. C. Willis, M. G. Banwell, *Org. Lett.*, 2006, **8**, 2143.
- [12] Y.-J. Zhao, T.-P. Loh, *Org. Lett.*, 2008, **10**, 2143.
- [13] H. A. McManus, M. J. Fleming, M. Lautens, *Angew. Chem. Int. Ed.*, 2007, **43**, 433.



## 8. X-Ray Diffraction Analysis

### 8.1

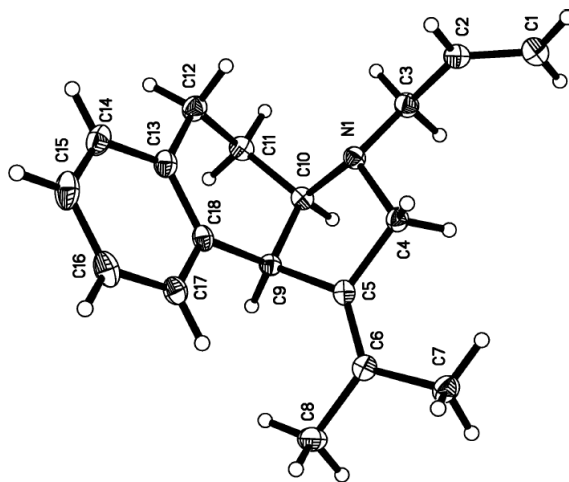

**Figure S1.** ORTEP drawing of **2a** showing 50% probability chosen for the ellipsoids.

### 8.2 Crystal data and structure refinement for 2a

|                                 |                                          |                            |
|---------------------------------|------------------------------------------|----------------------------|
| CCDC number                     | 965133                                   |                            |
| Identification code             | <b>2a</b>                                |                            |
| Empirical formula               | C <sub>18</sub> H <sub>23</sub> N        |                            |
| Formula weight                  | 253.37                                   |                            |
| Temperature                     | 103(2) K                                 |                            |
| Wavelength                      | 0.71073 Å                                |                            |
| Crystal system                  | Triclinic                                |                            |
| Space group                     | P-1                                      |                            |
| Unit cell dimensions            | a = 8.5072(6) Å                          | $\alpha = 88.049(3)^\circ$ |
|                                 | b = 9.2974(6) Å                          | $\beta = 78.840(3)^\circ$  |
|                                 | c = 9.7885(6) Å                          | $\gamma = 70.388(3)^\circ$ |
| Volume                          | 715.11(8) Å <sup>3</sup>                 |                            |
| Z                               | 2                                        |                            |
| Density (calculated)            | 1.177 Mg/m <sup>3</sup>                  |                            |
| Absorption coefficient          | 0.067 mm <sup>-1</sup>                   |                            |
| F(000)                          | 276                                      |                            |
| Crystal size                    | 0.40 x 0.40 x 0.08 mm <sup>3</sup>       |                            |
| Theta range for data collection | 2.84 to 29.08 °                          |                            |
| Index ranges                    | -11 ≤ h ≤ 11, -12 ≤ k ≤ 12, -12 ≤ l ≤ 13 |                            |
| Reflections collected           | 10410                                    |                            |
| Independent reflections         | 3781 [R(int) = 0.0447]                   |                            |

|                                   |                                             |
|-----------------------------------|---------------------------------------------|
| Completeness to theta = 29.08 °   | 98.8 %                                      |
| Absorption correction             | Semi-empirical from equivalents             |
| Max. and min. transmission        | 0.9946 and 0.9735                           |
| Refinement method                 | Full-matrix least-squares on F <sup>2</sup> |
| Data / restraints / parameters    | 3781 / 0 / 174                              |
| Goodness-of-fit on F <sup>2</sup> | 1.026                                       |
| Final R indices [I>2sigma(I)]     | R1 = 0.0507, wR2 = 0.1190                   |
| R indices (all data)              | R1 = 0.0738, wR2 = 0.1325                   |
| Largest diff. peak and hole       | 0.335 and -0.236 e.Å <sup>-3</sup>          |

## 9. $^1\text{H}$ and $^{13}\text{C}$ NMR spectra

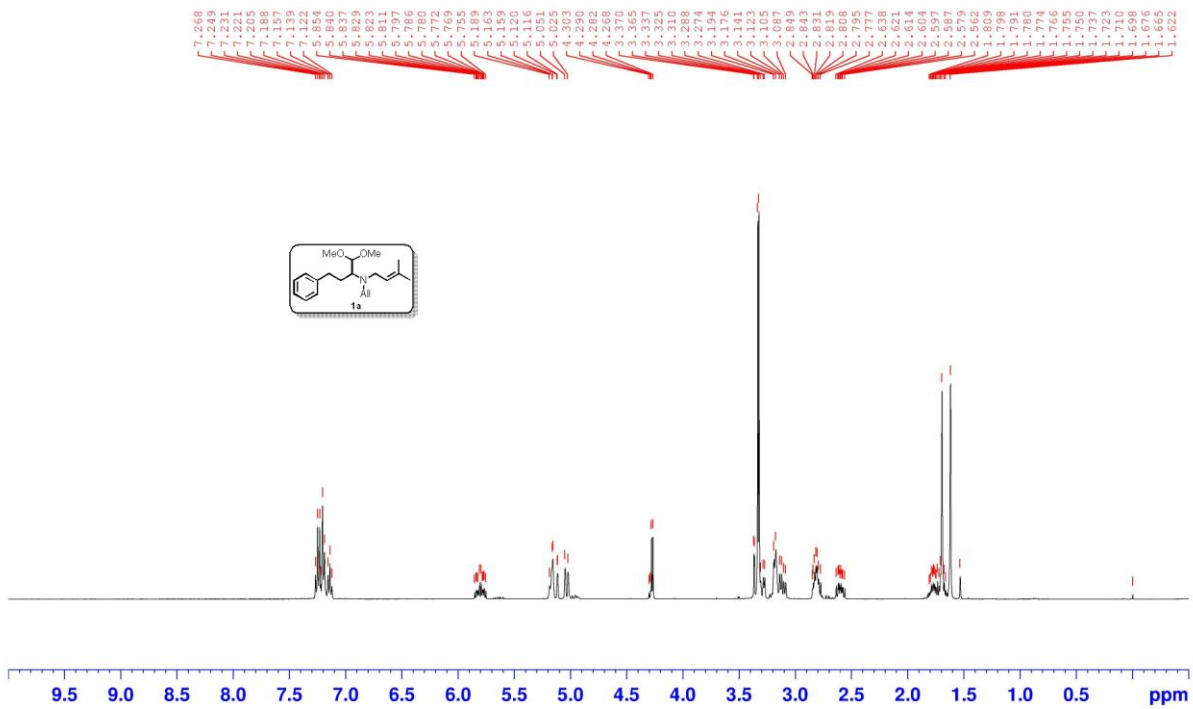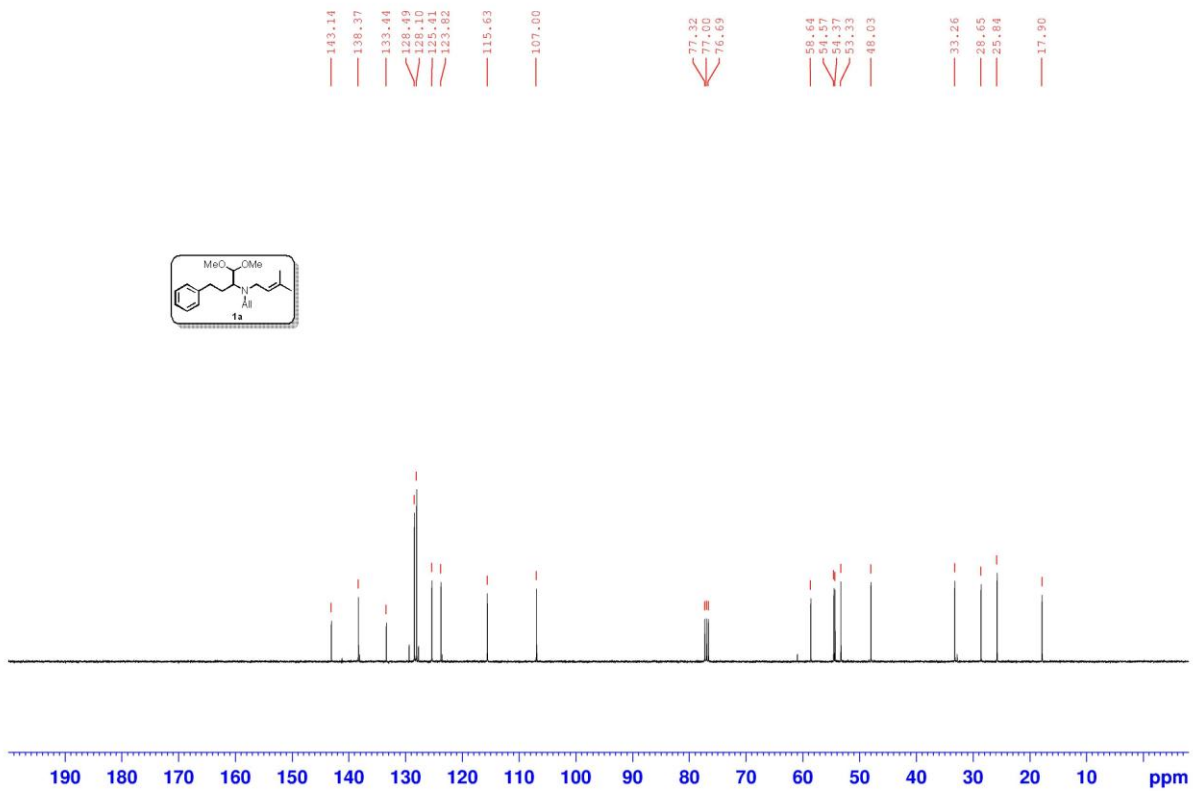

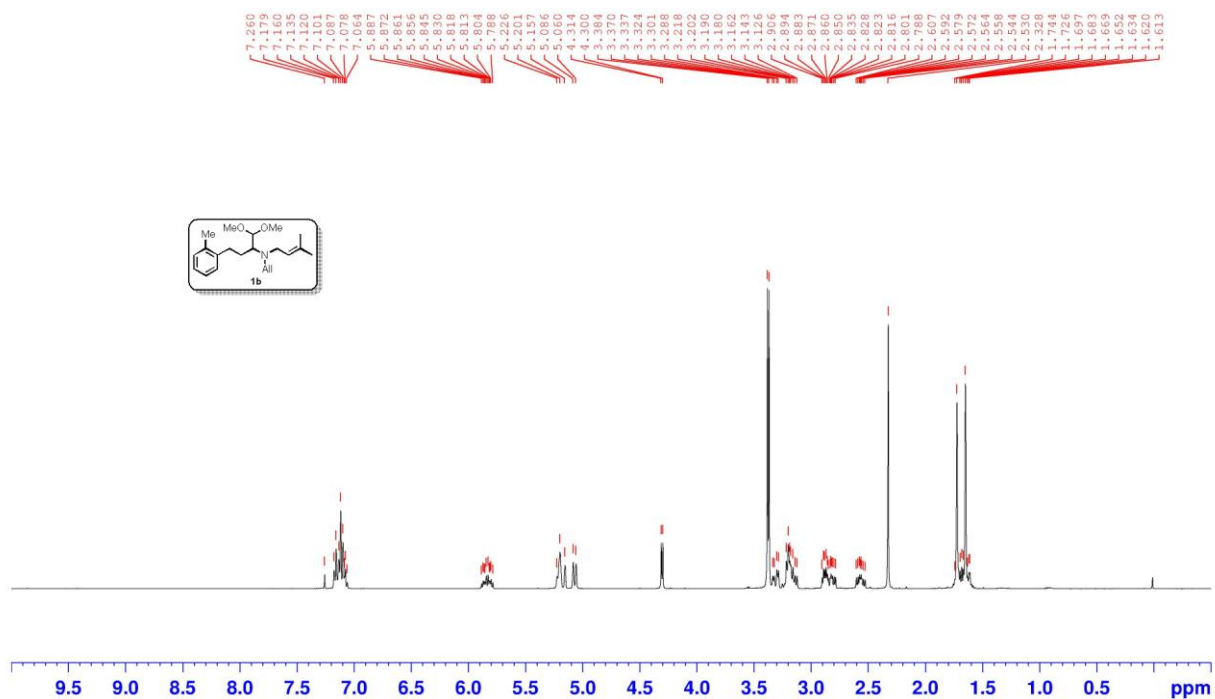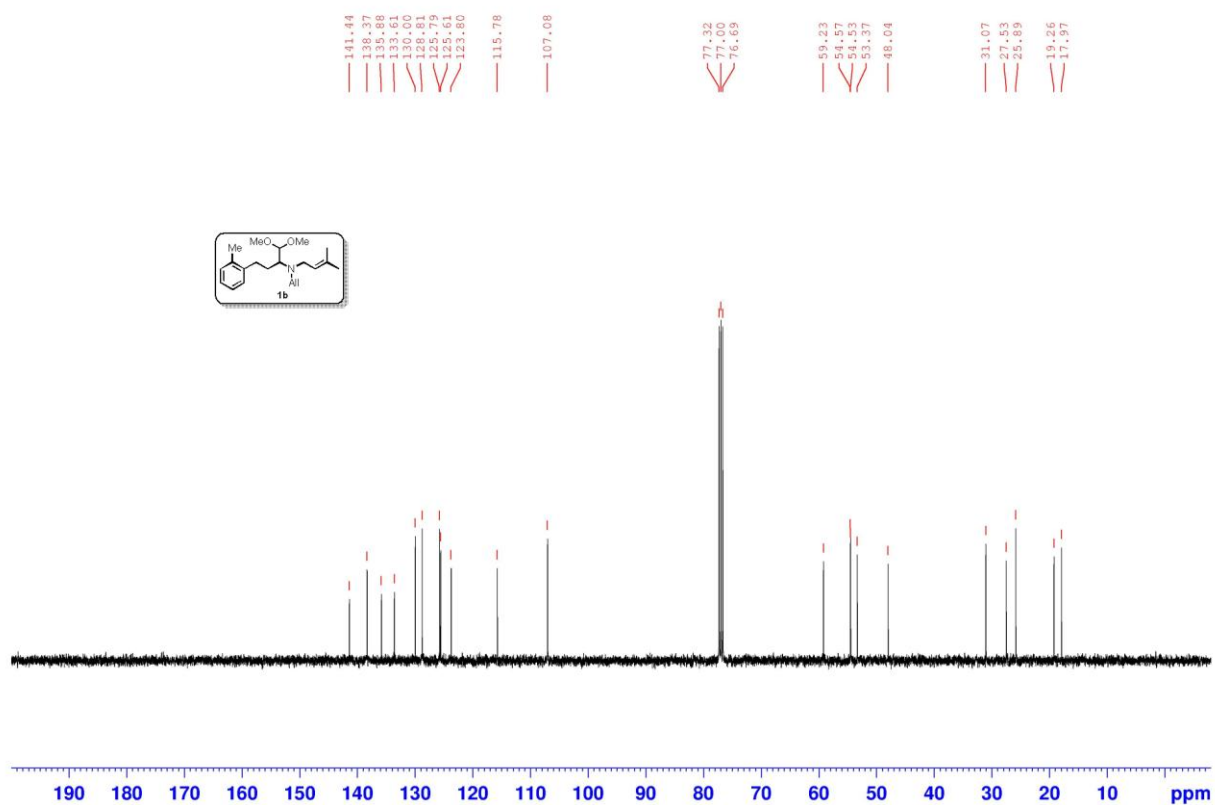

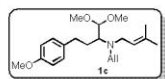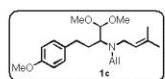

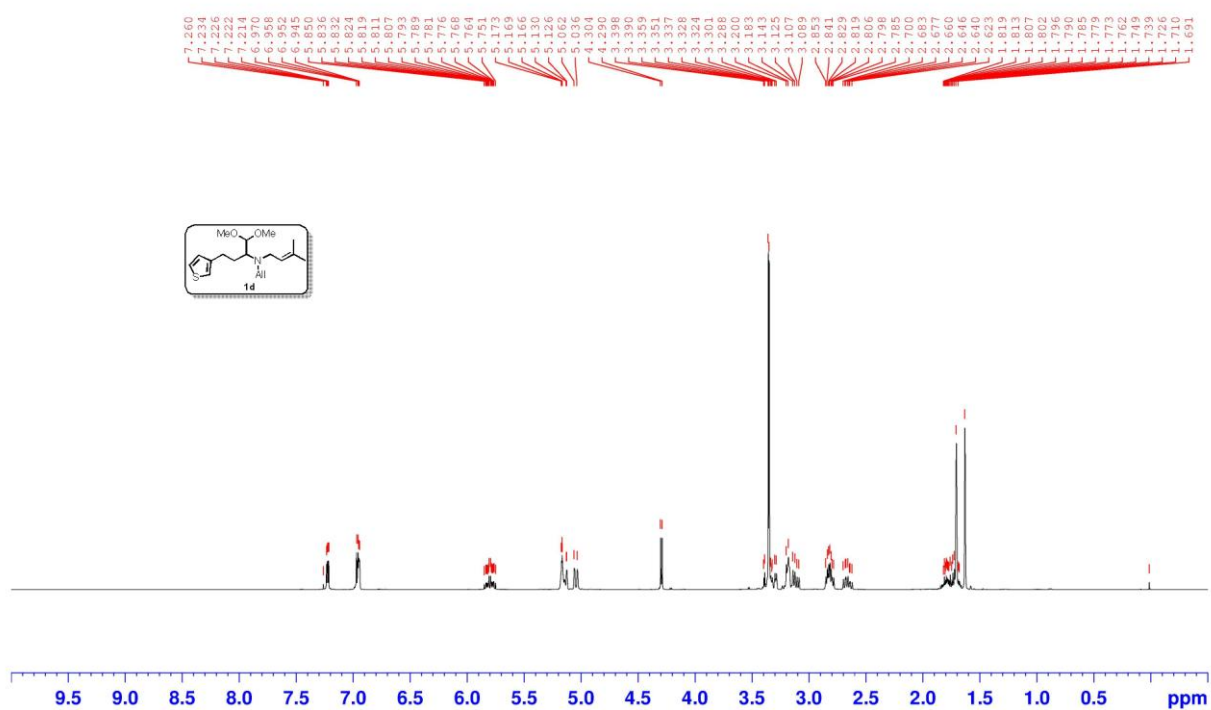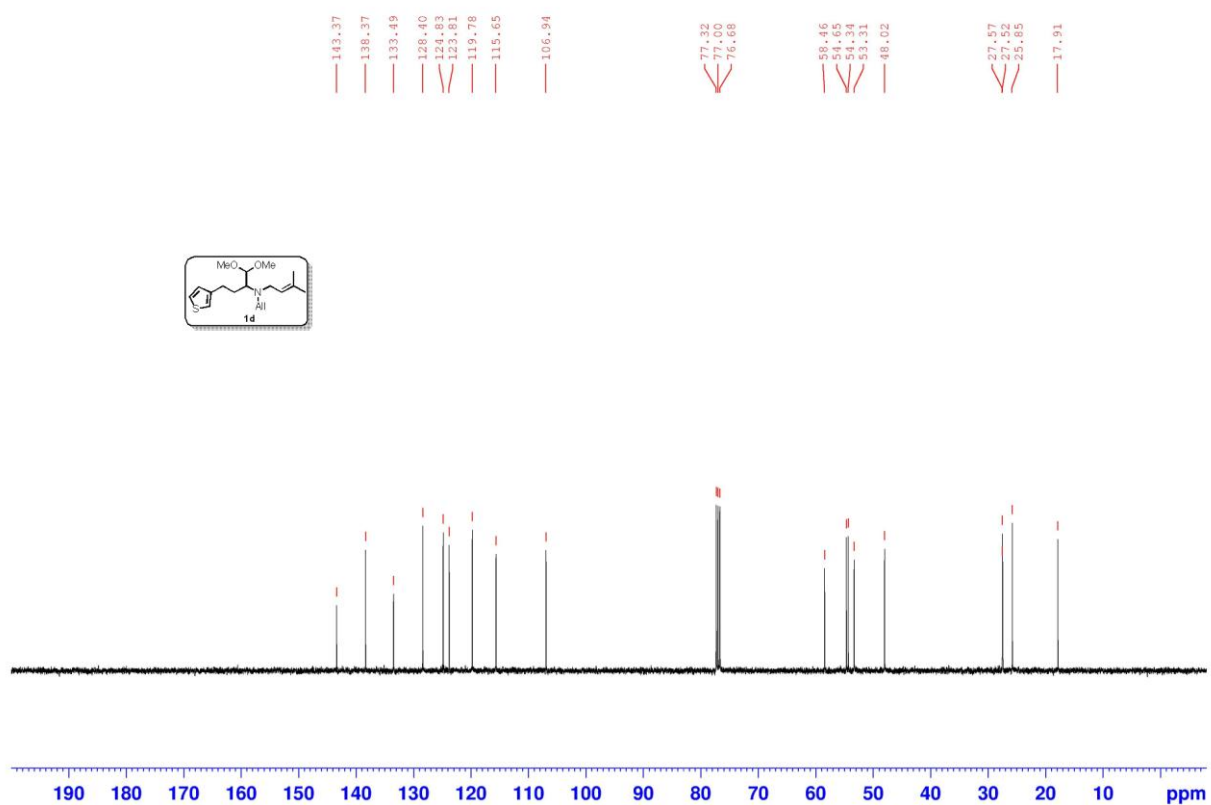

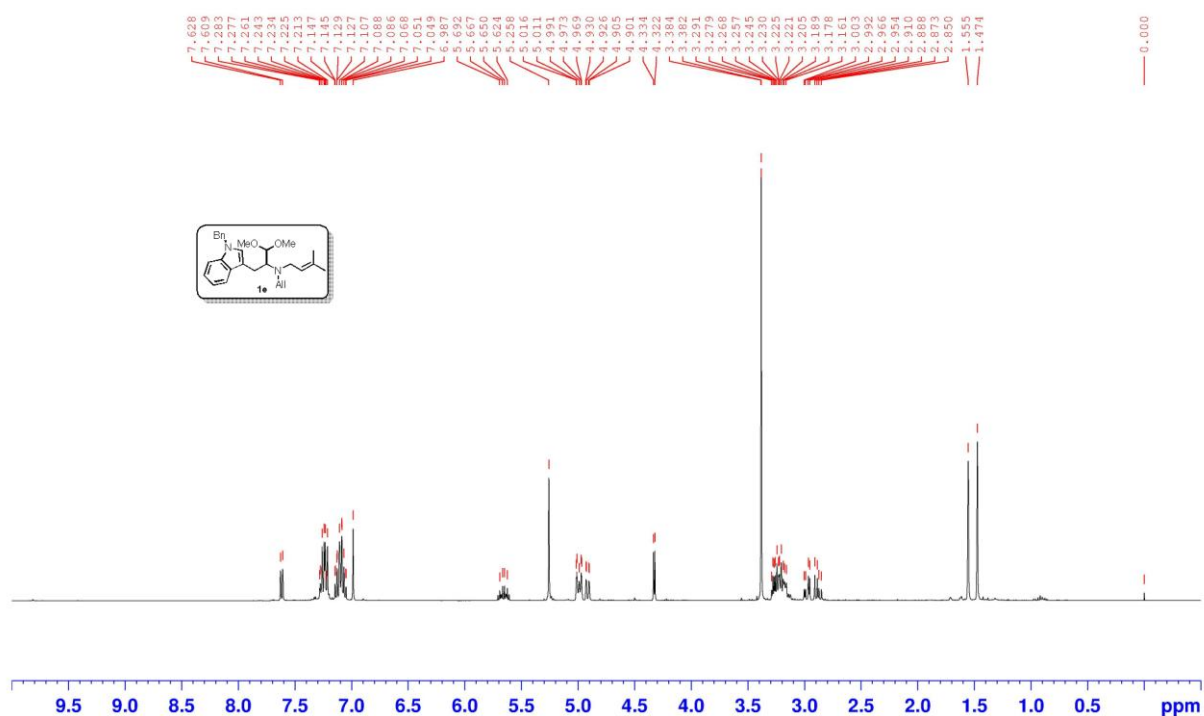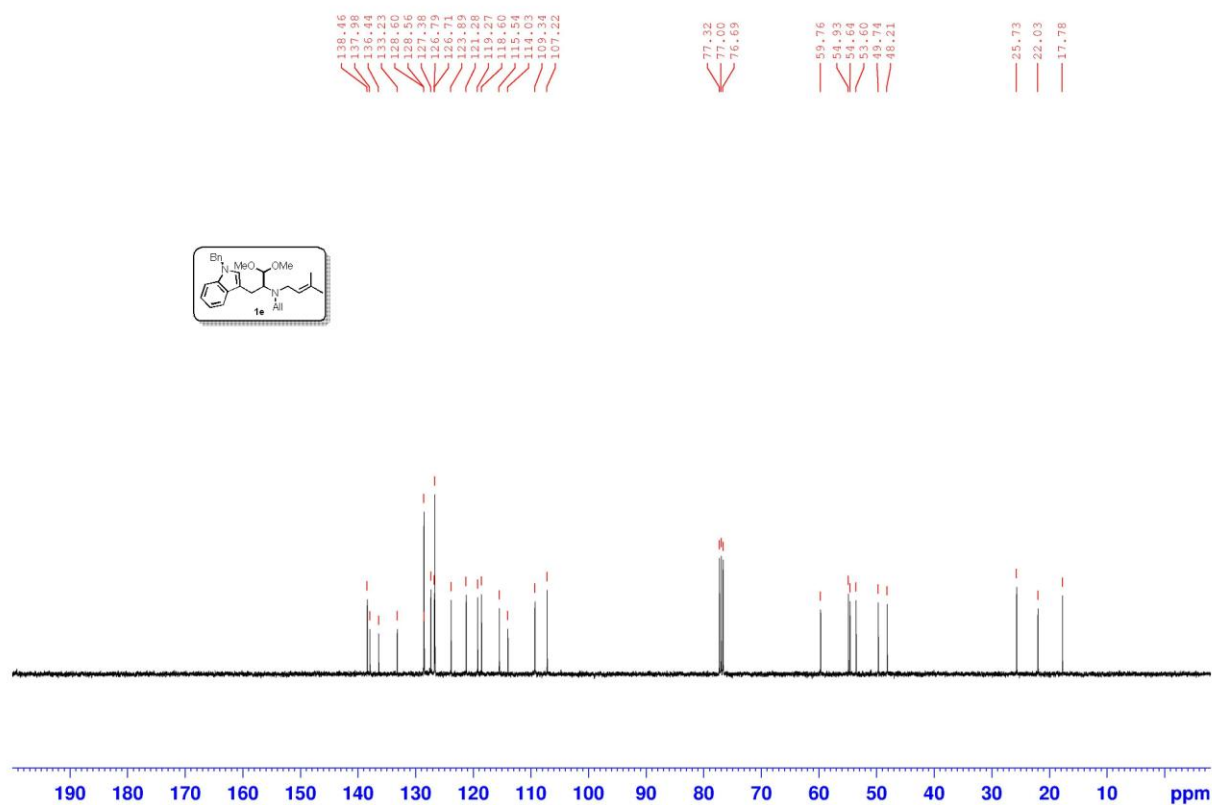

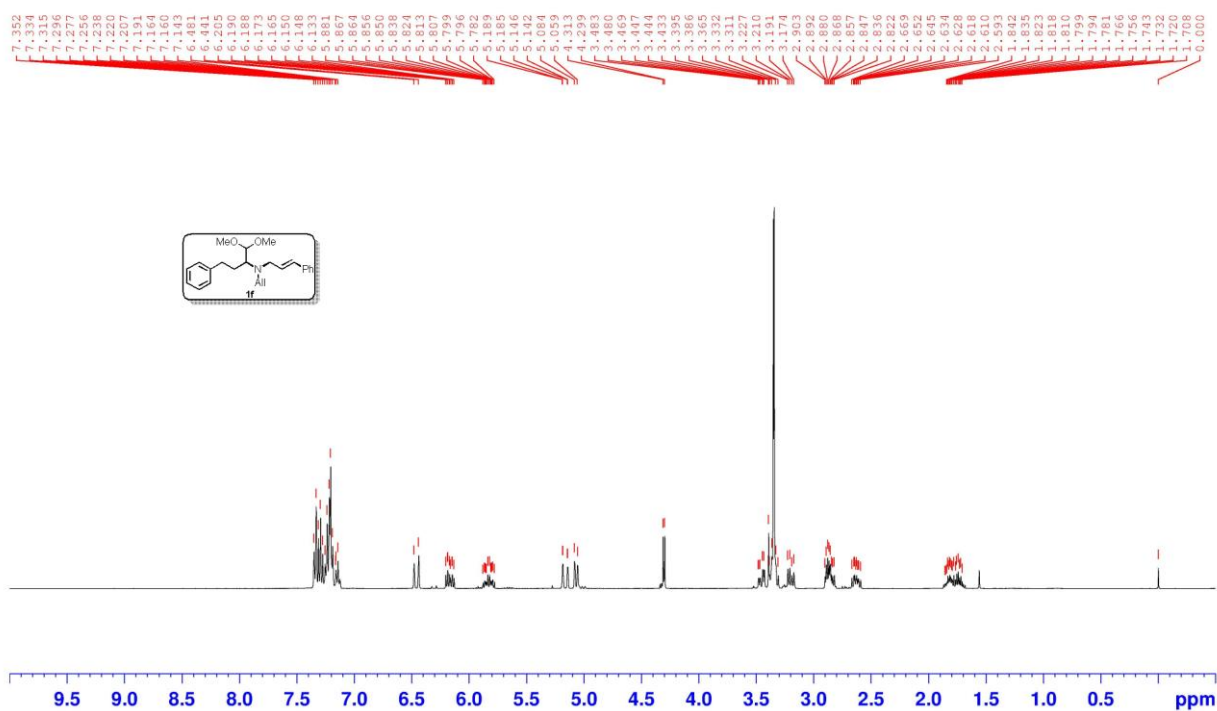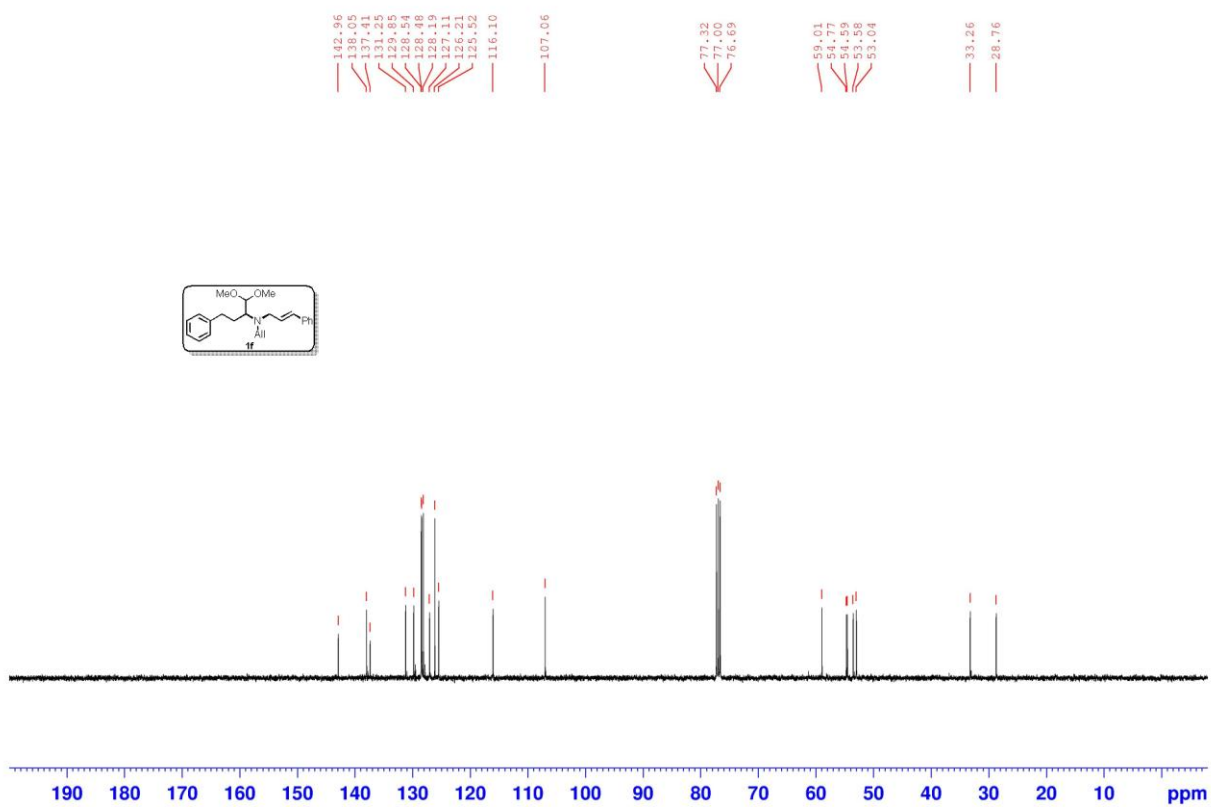



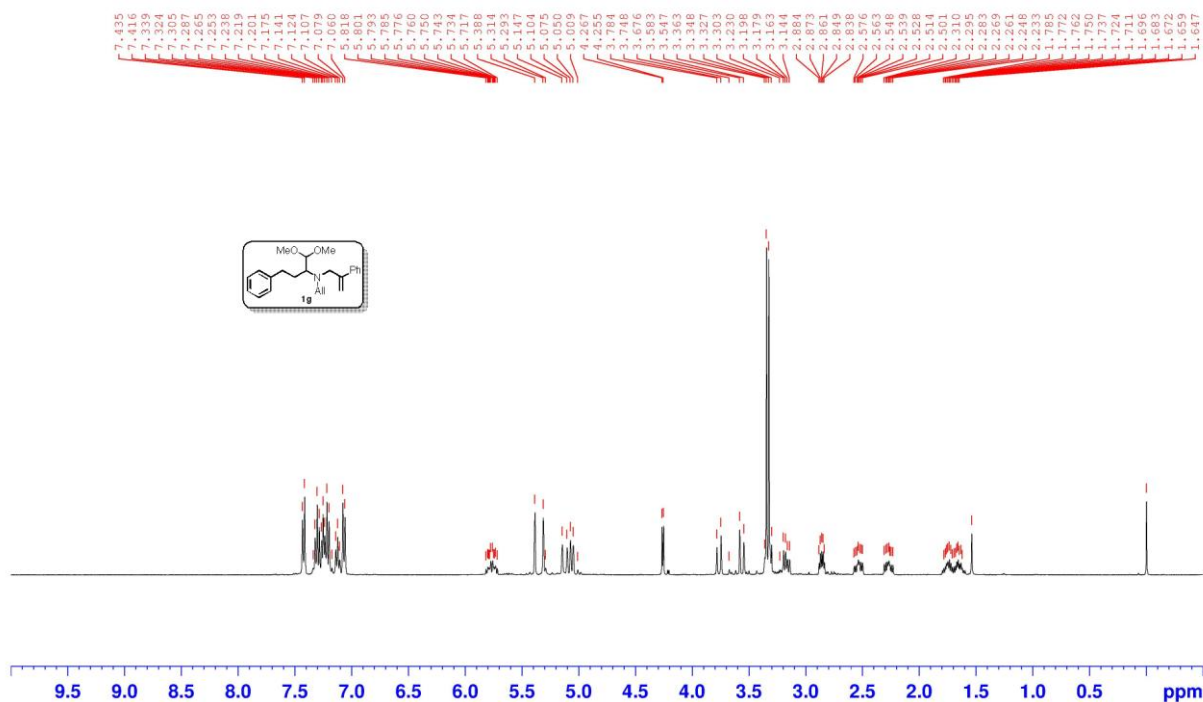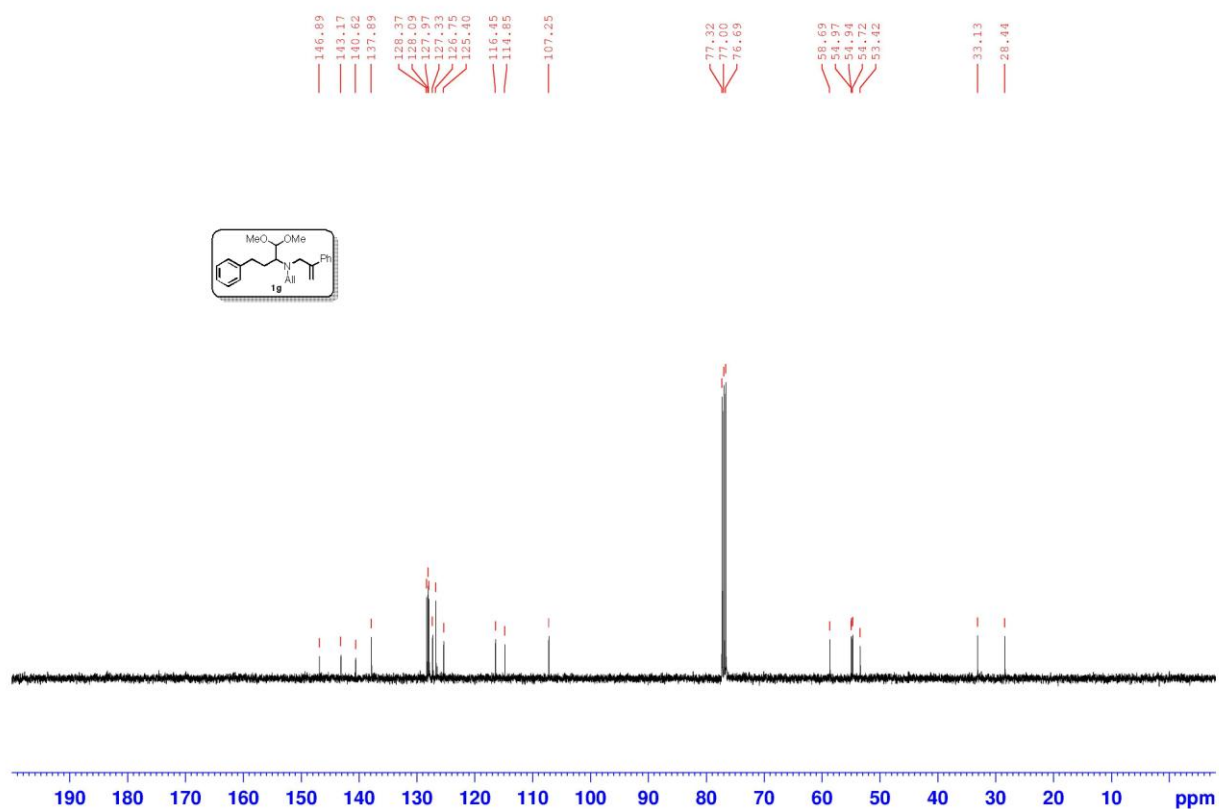

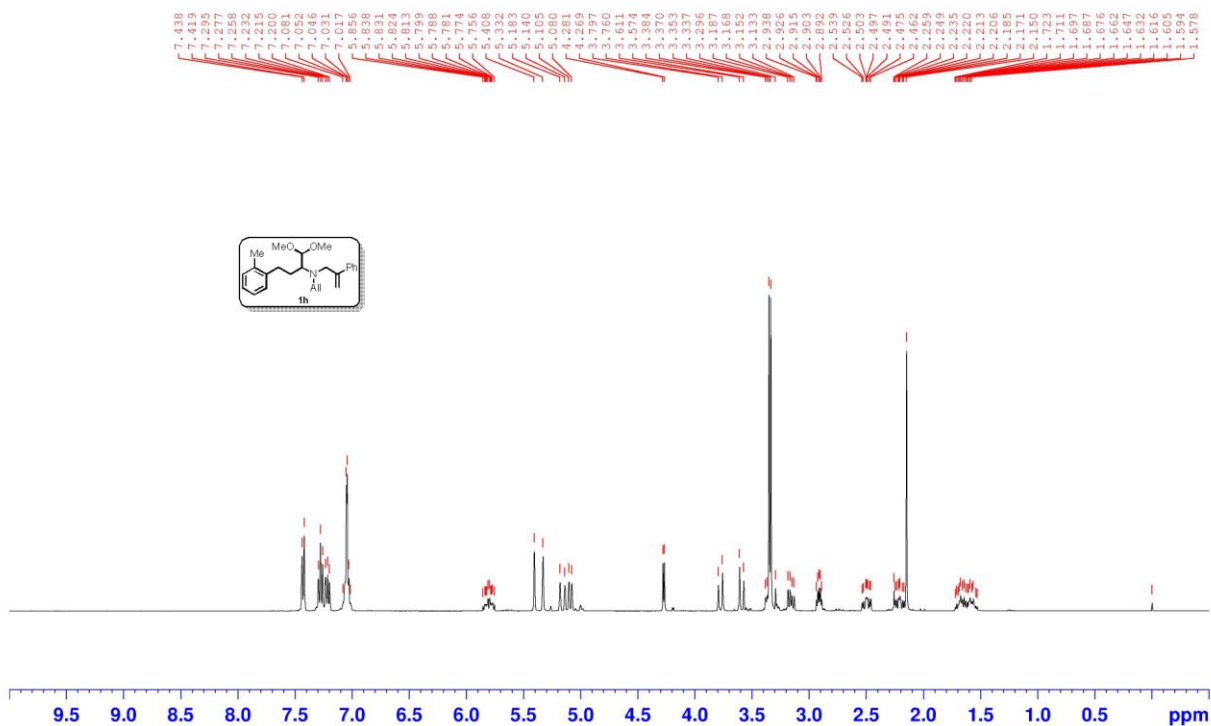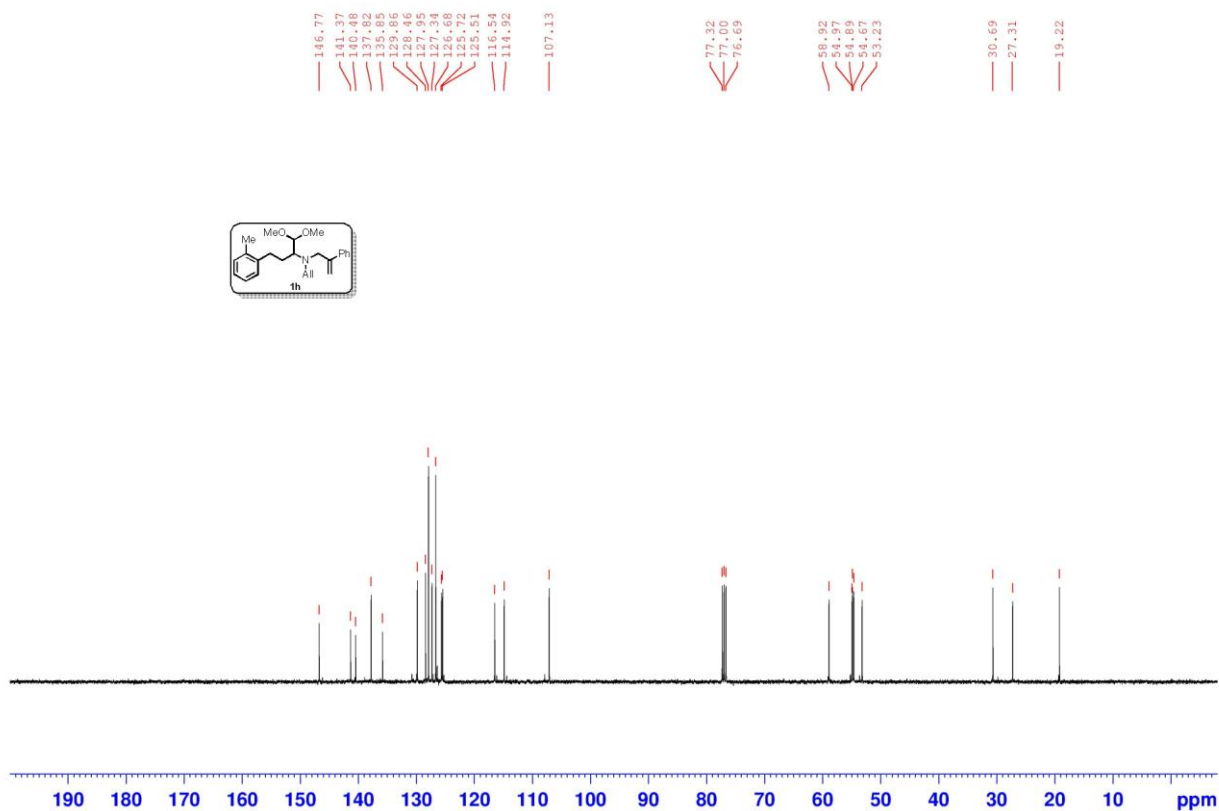

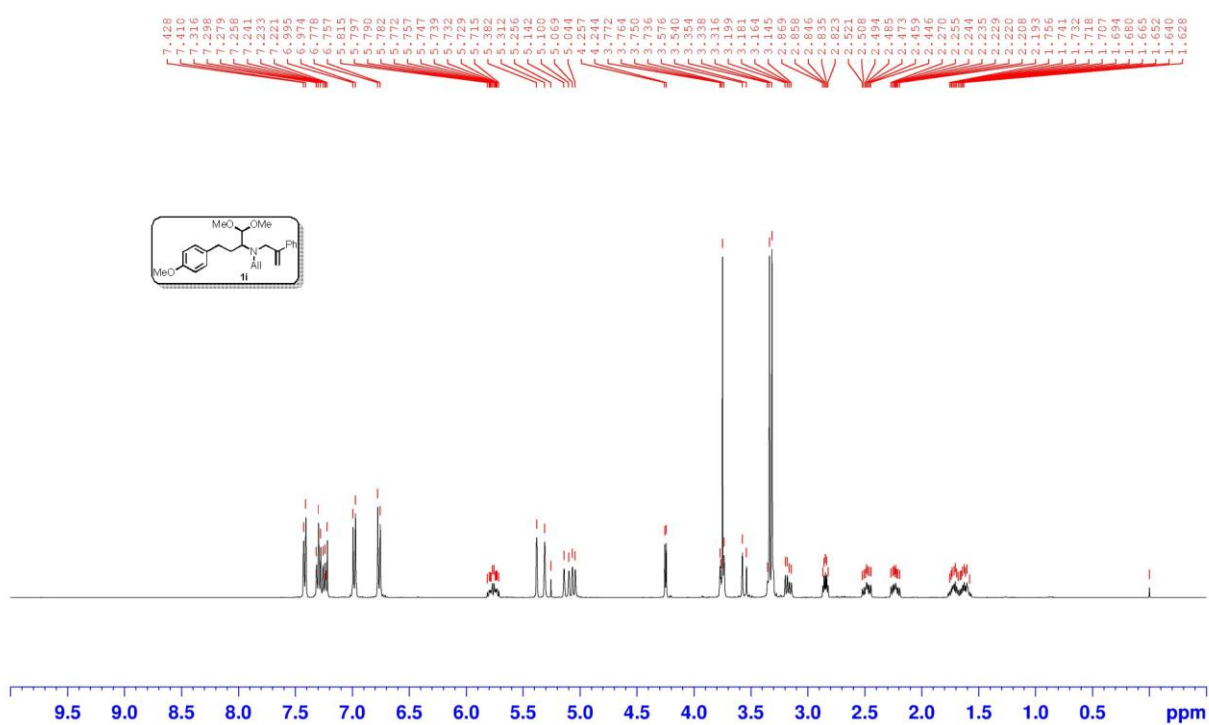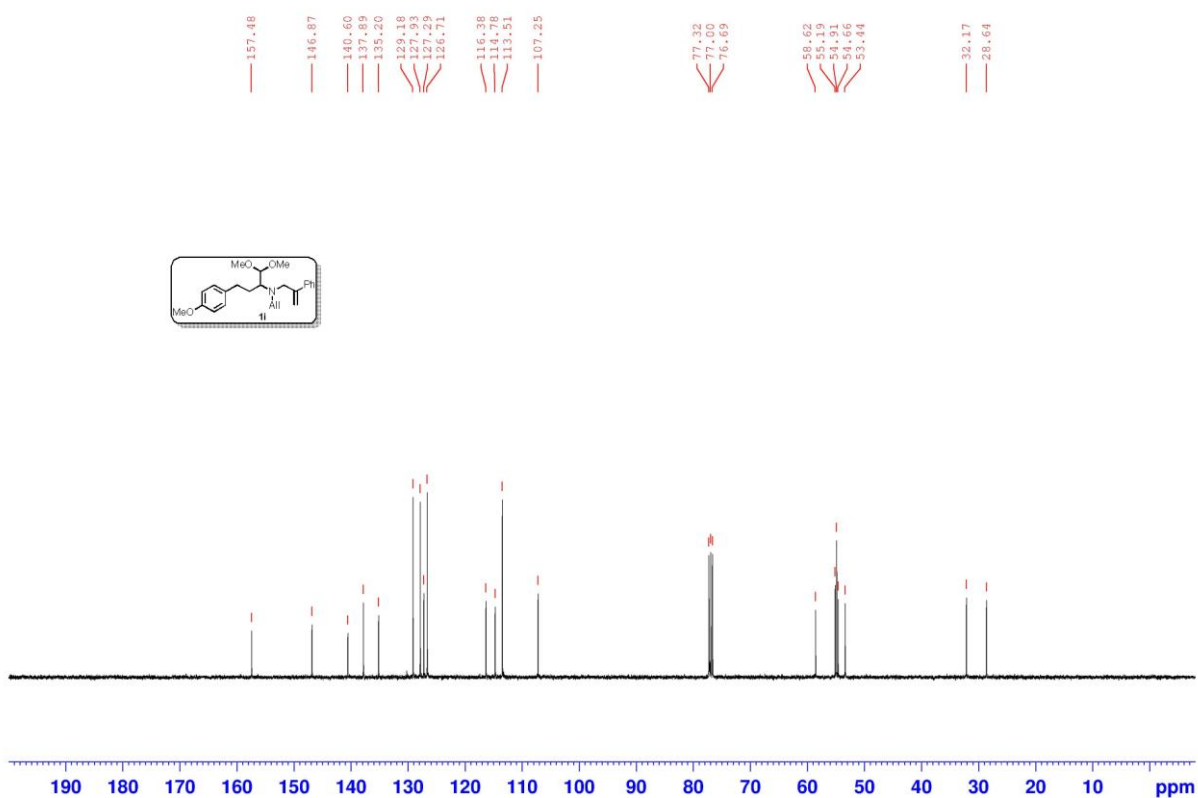

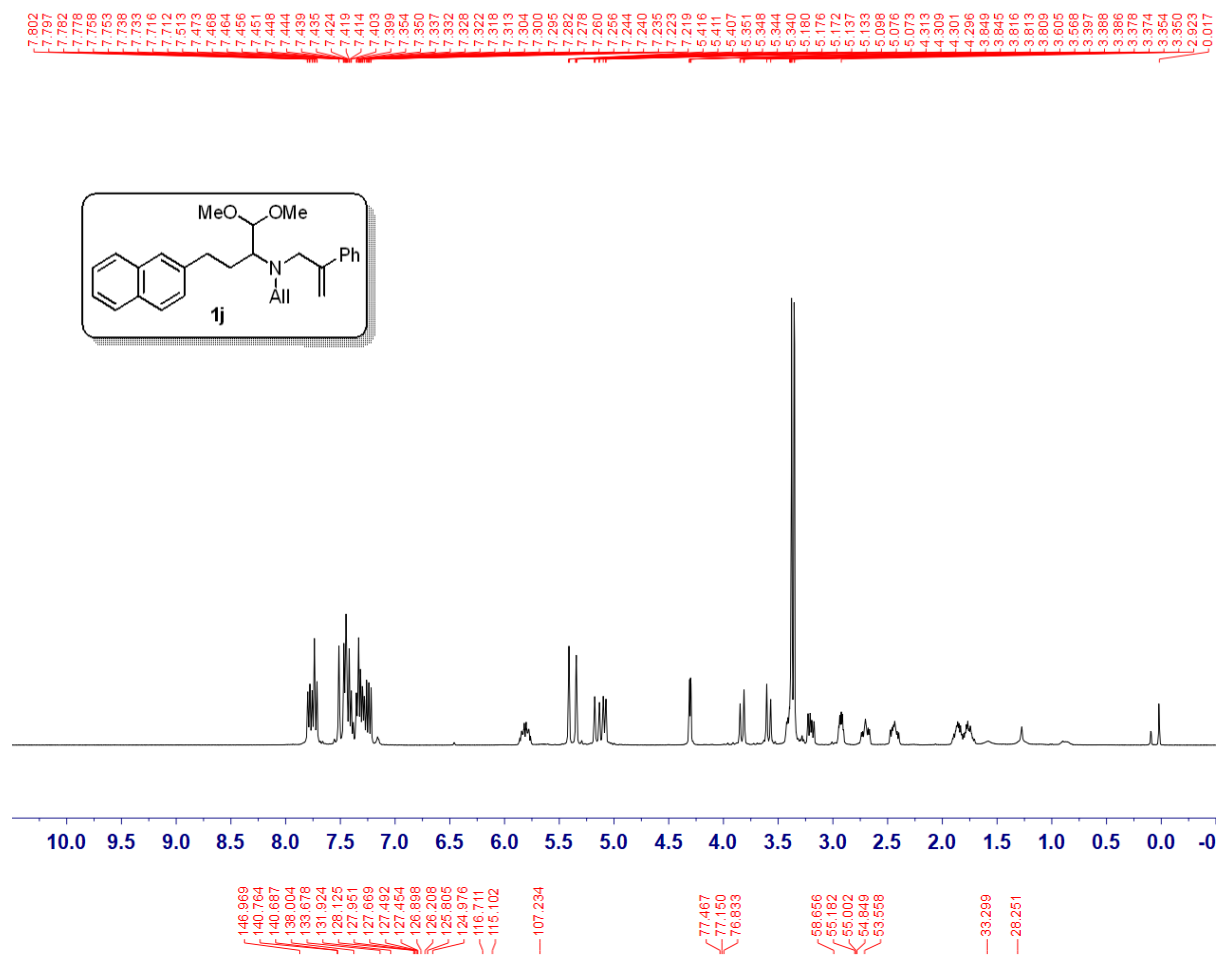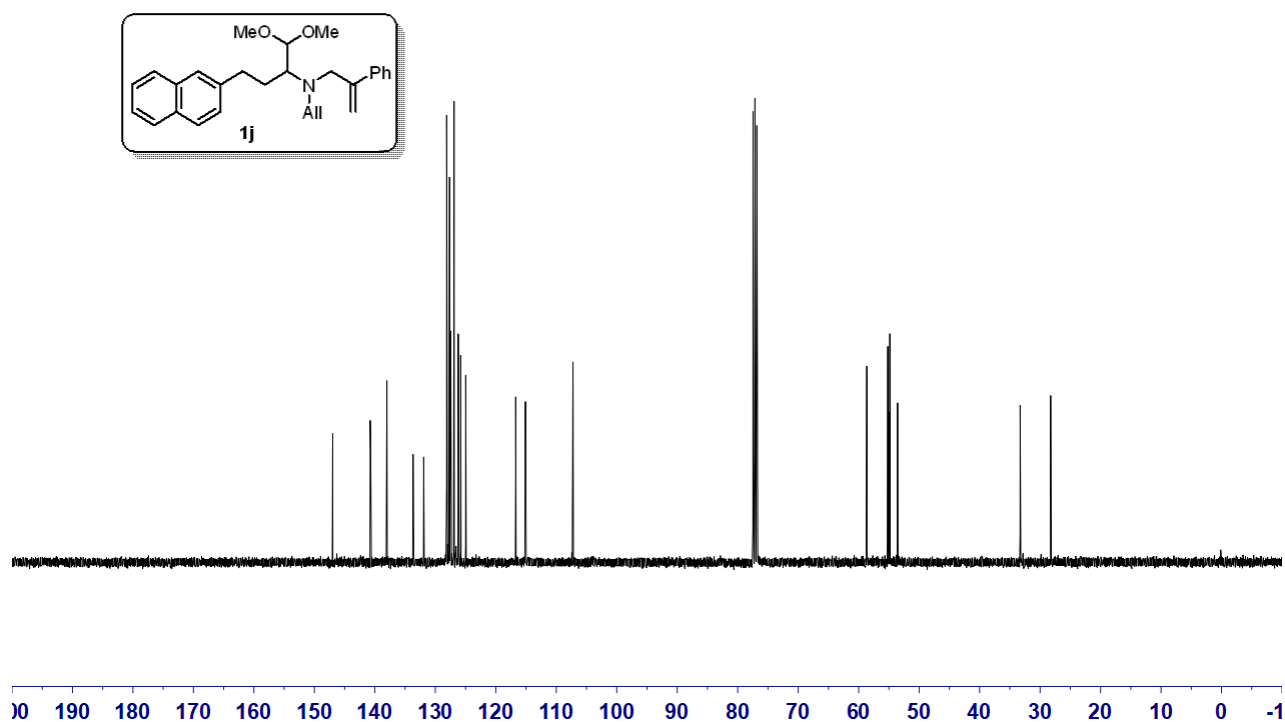

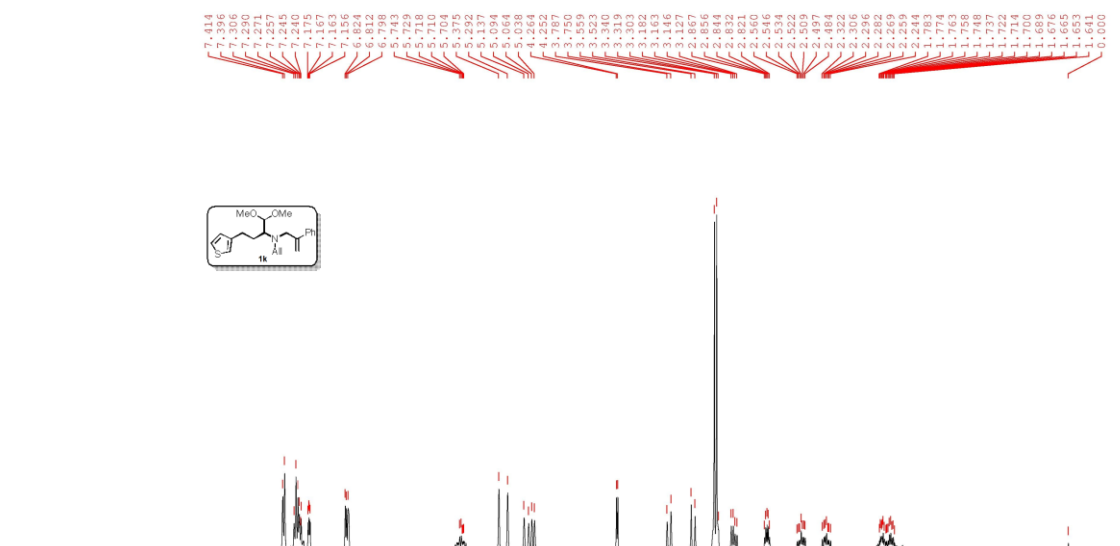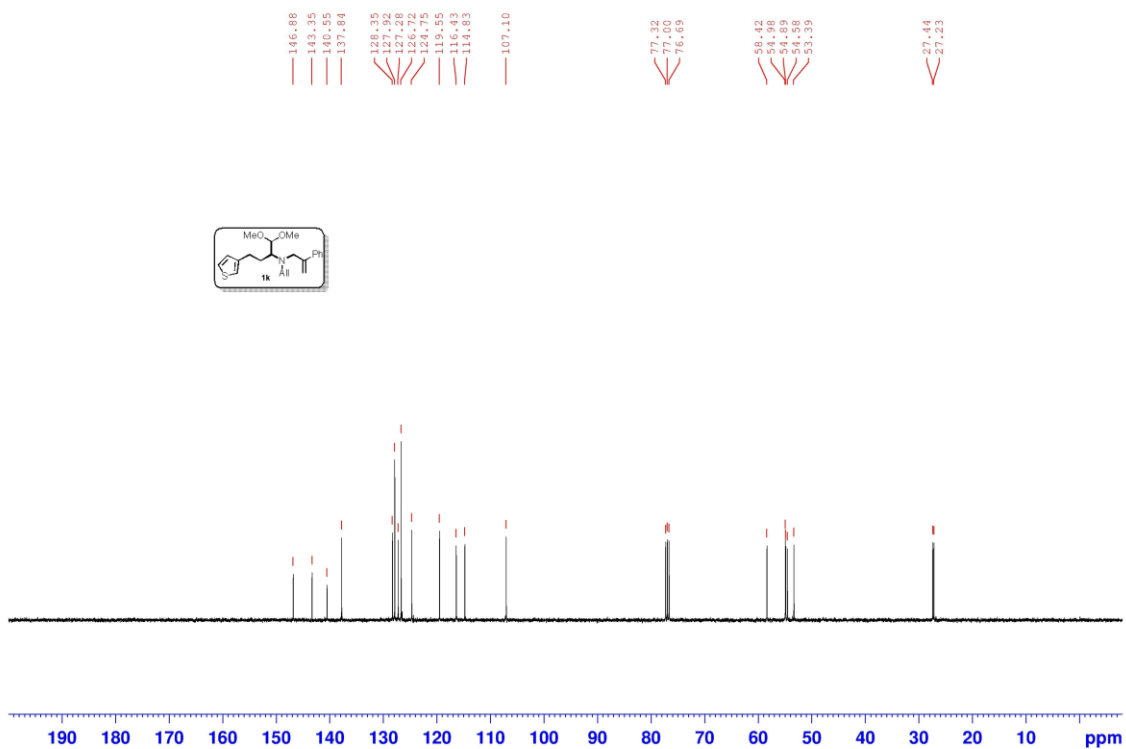

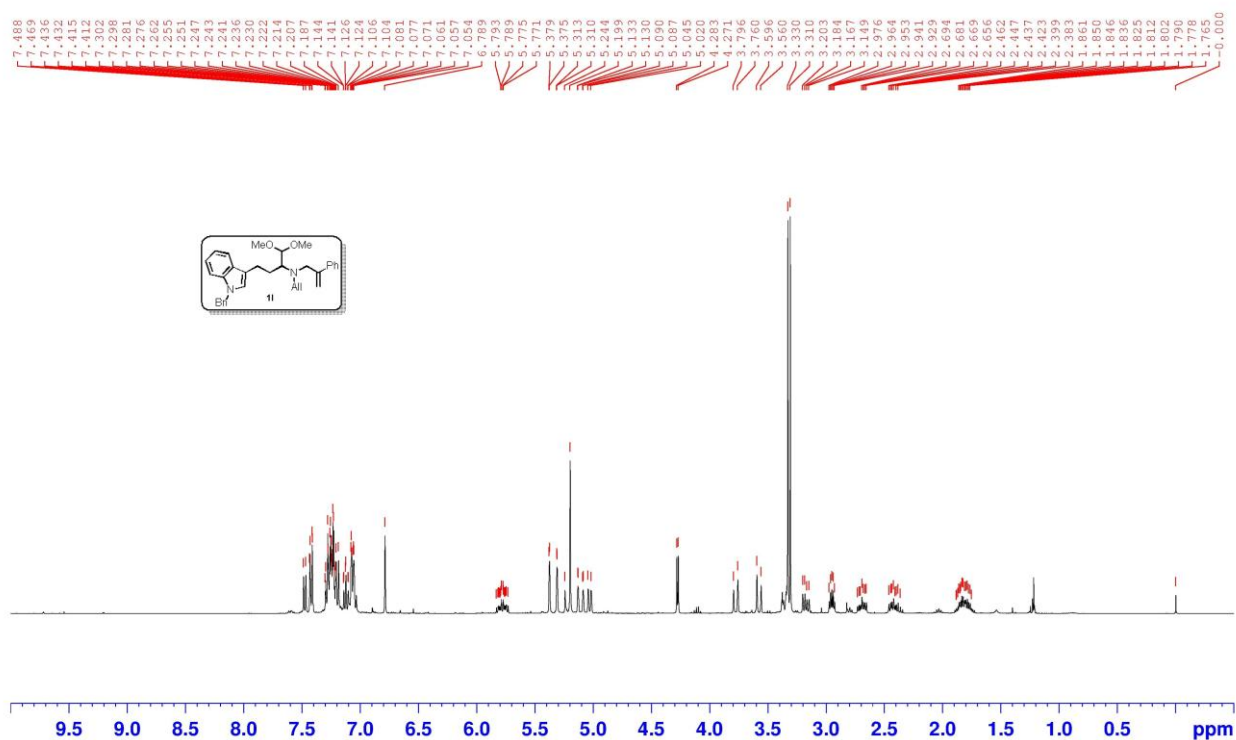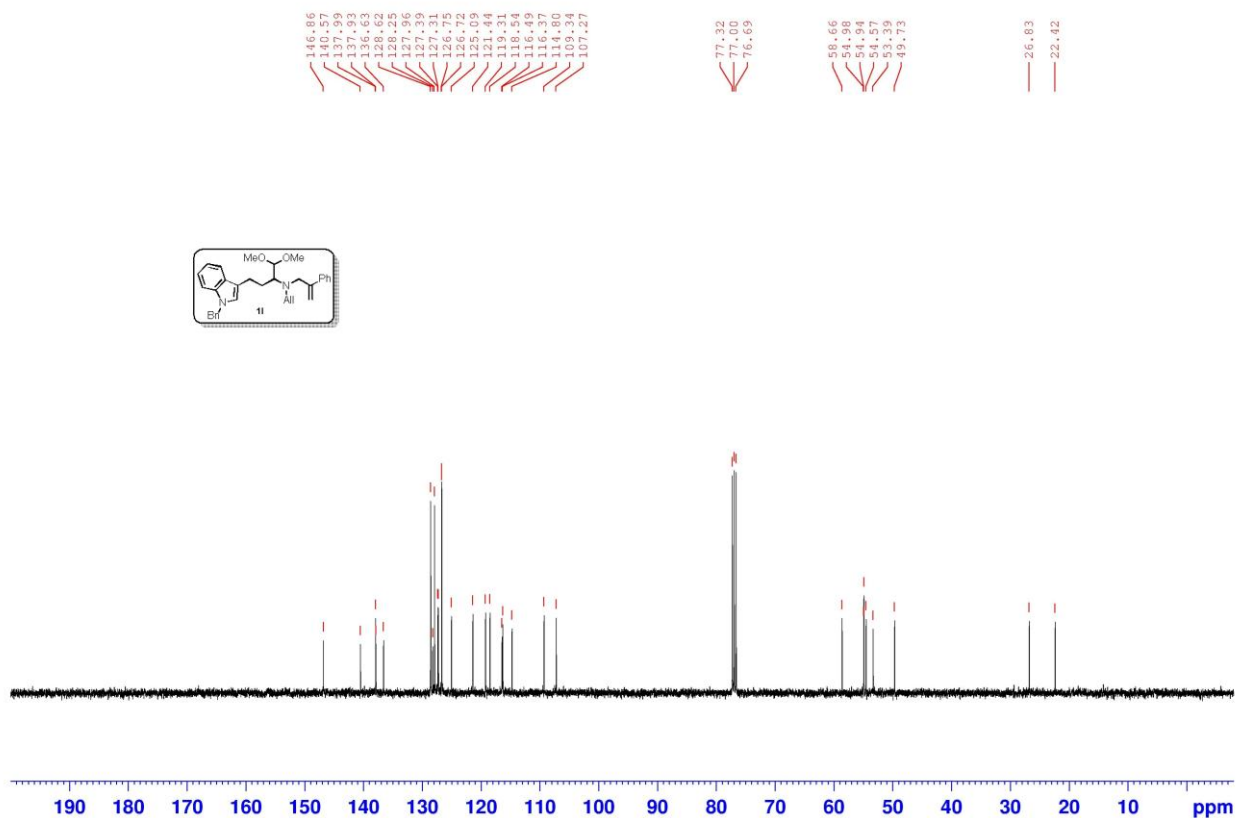

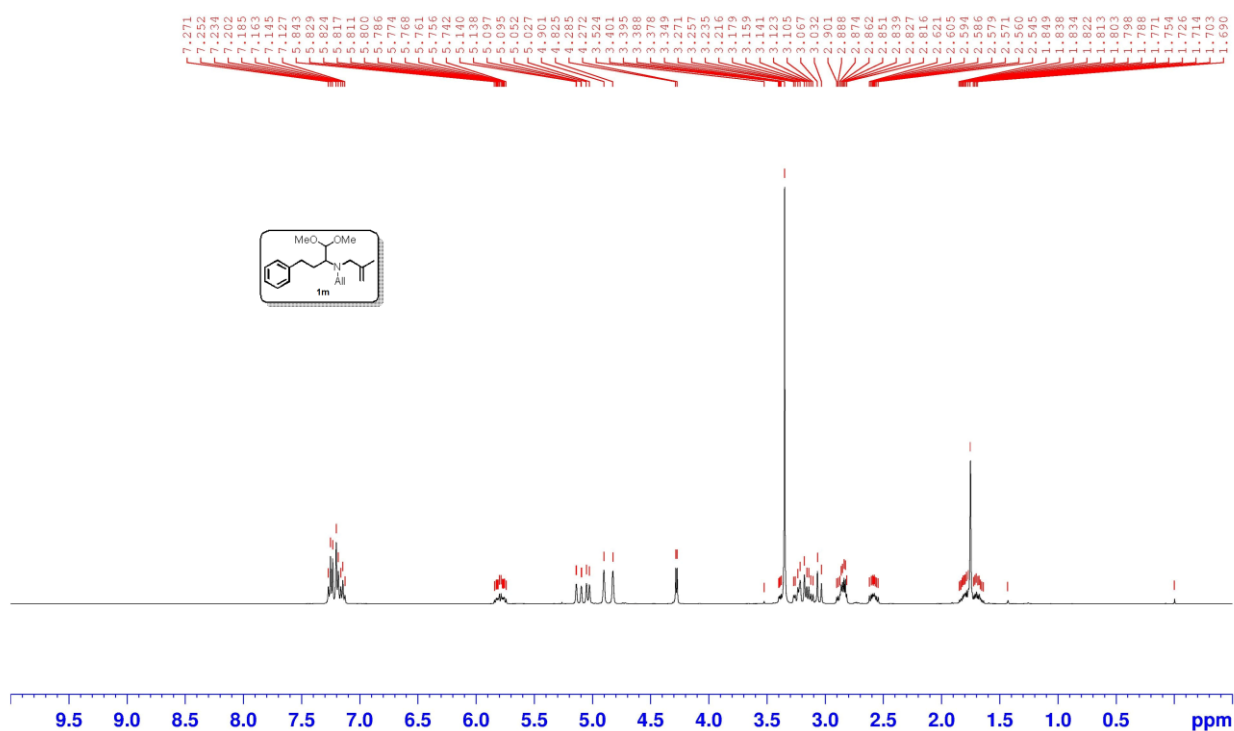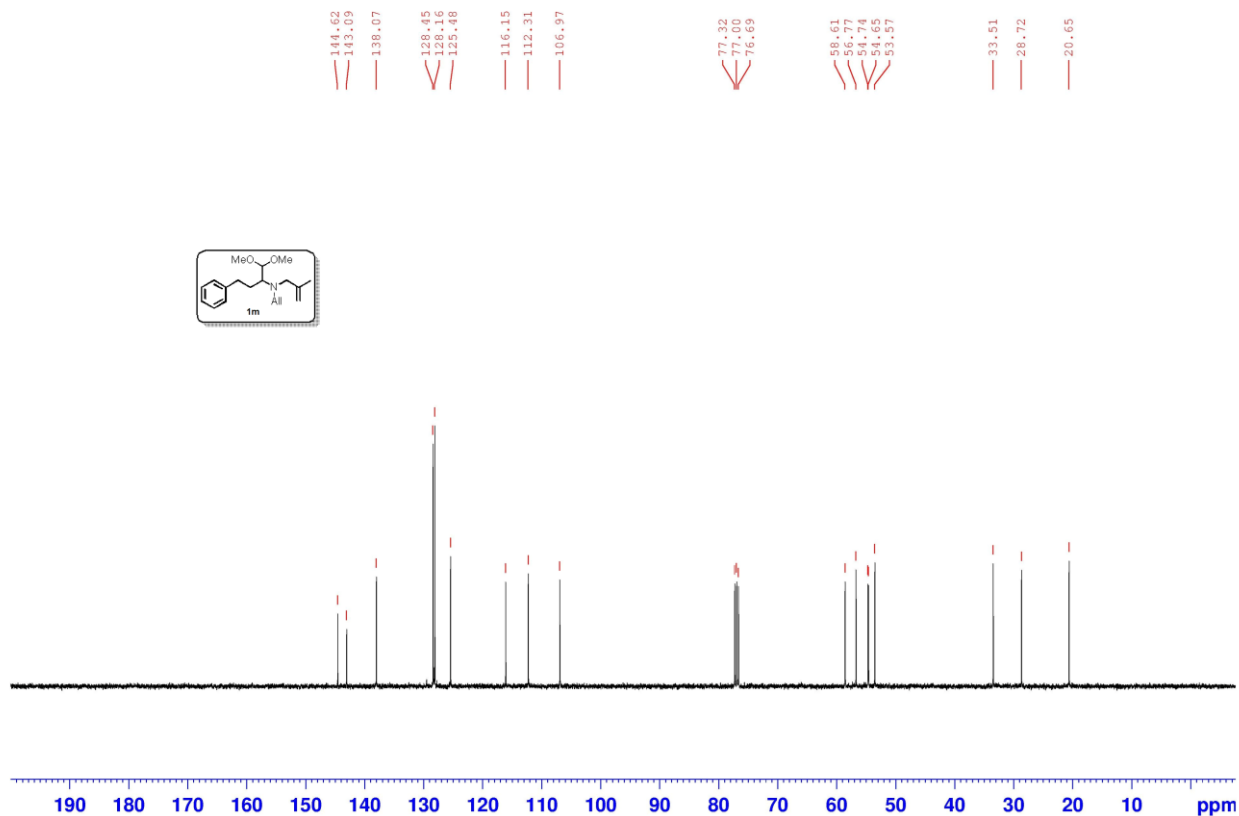

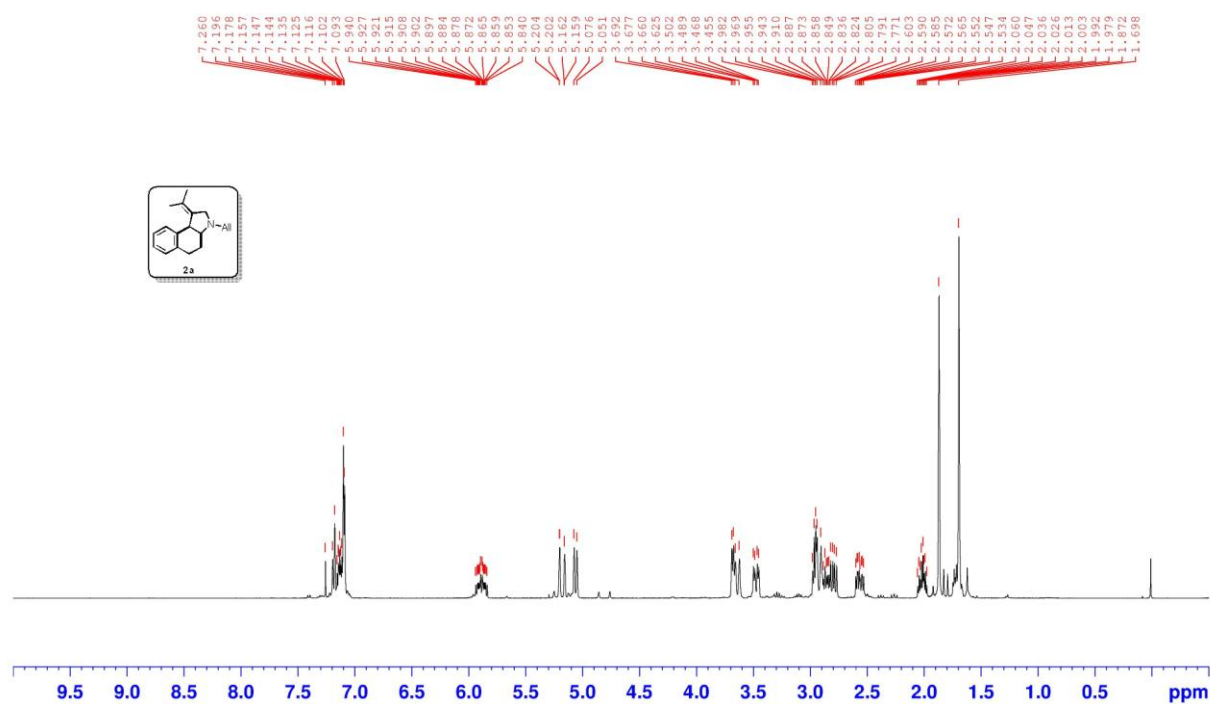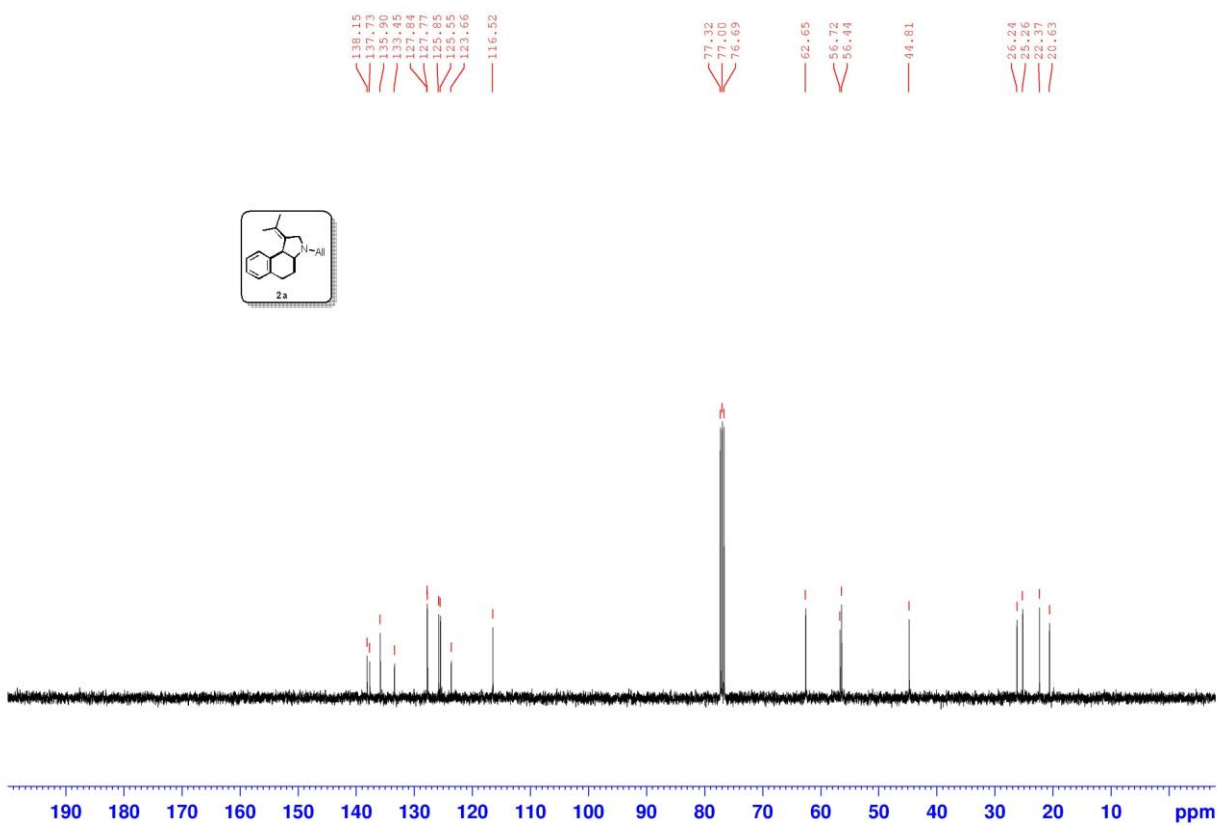



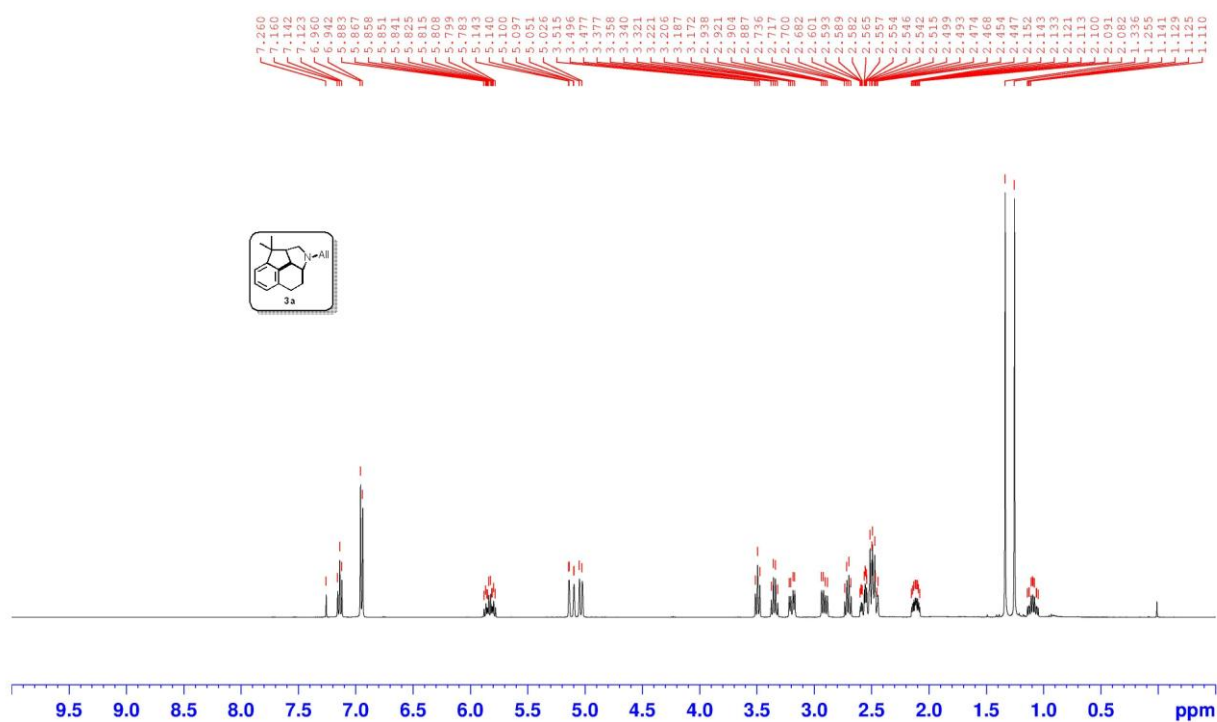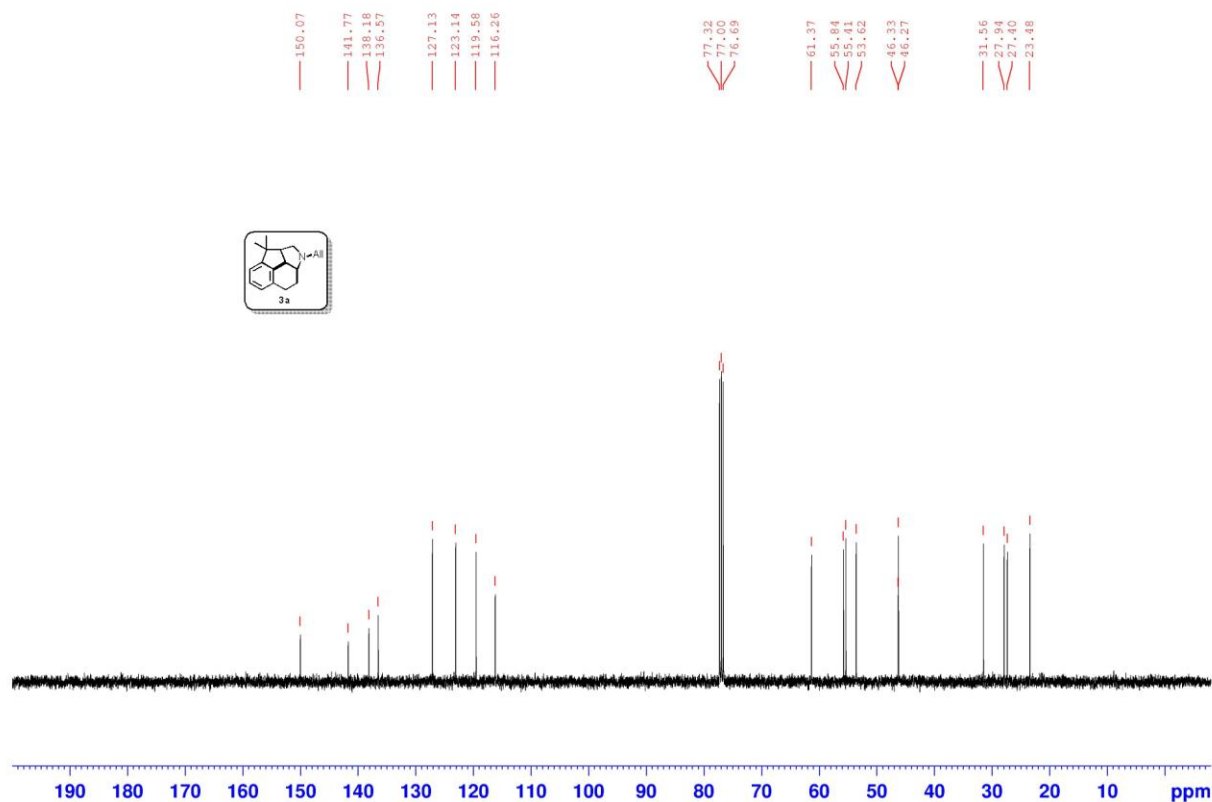

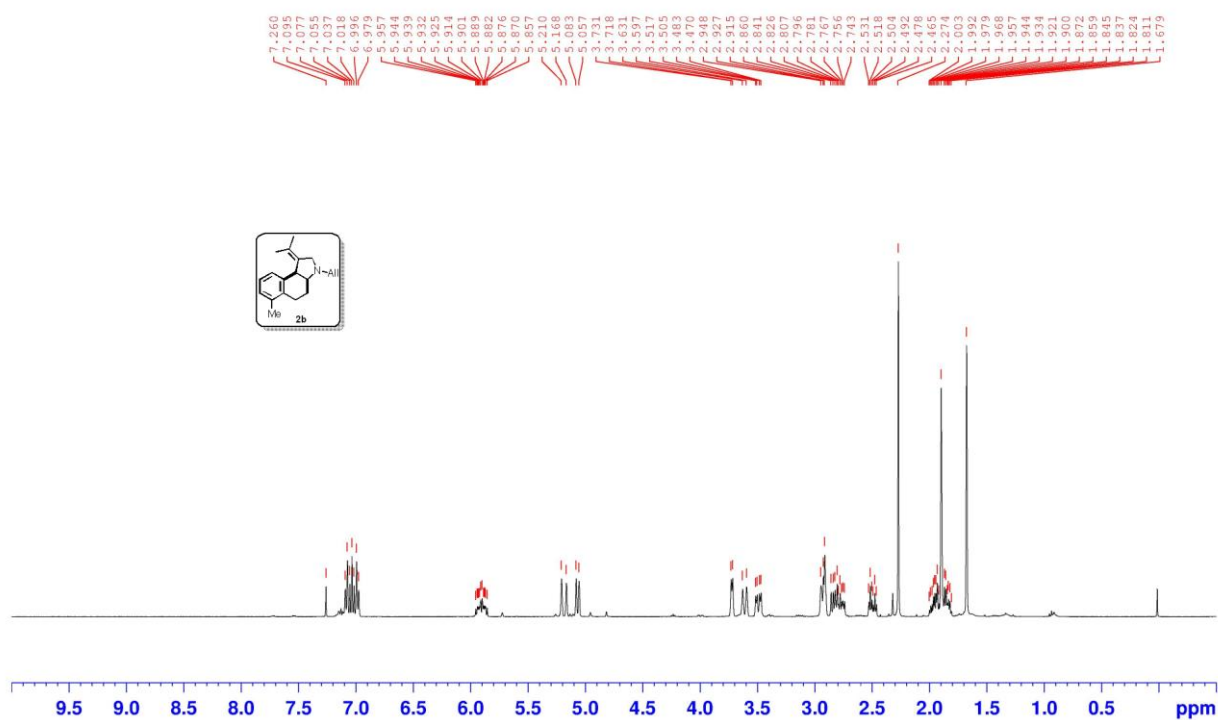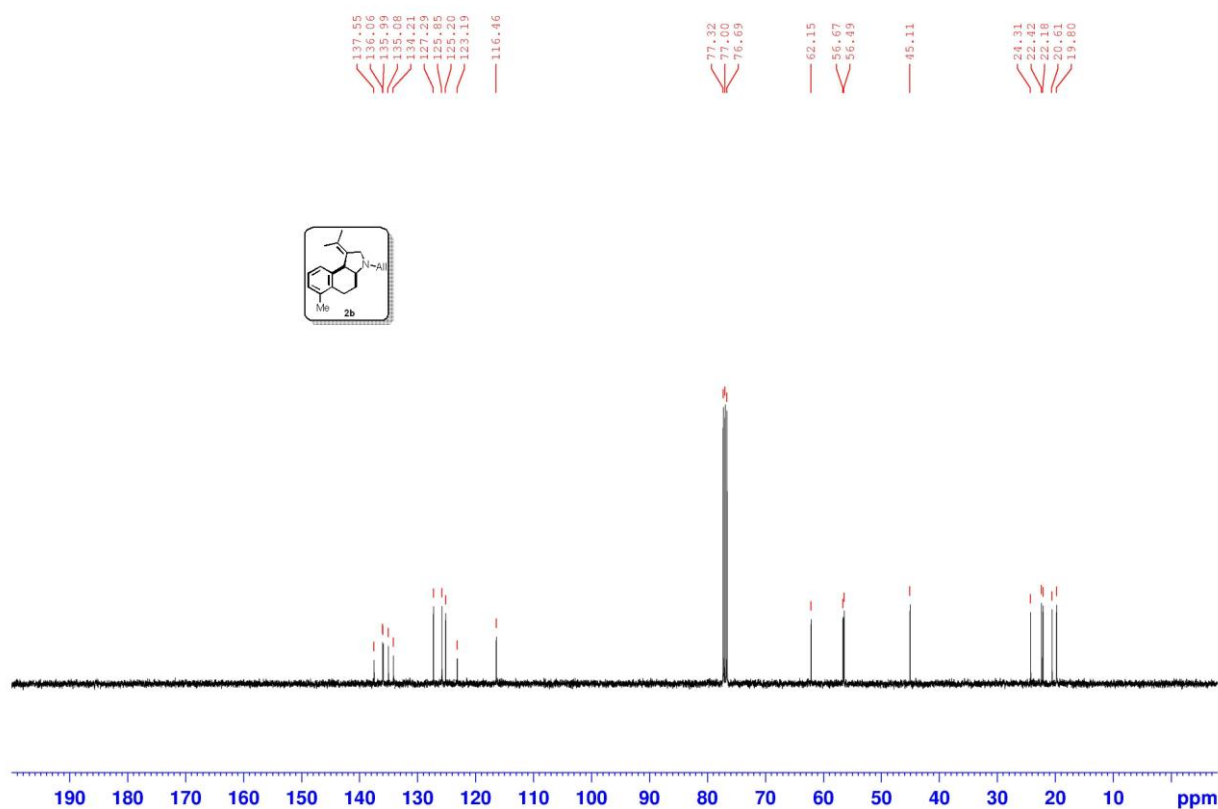

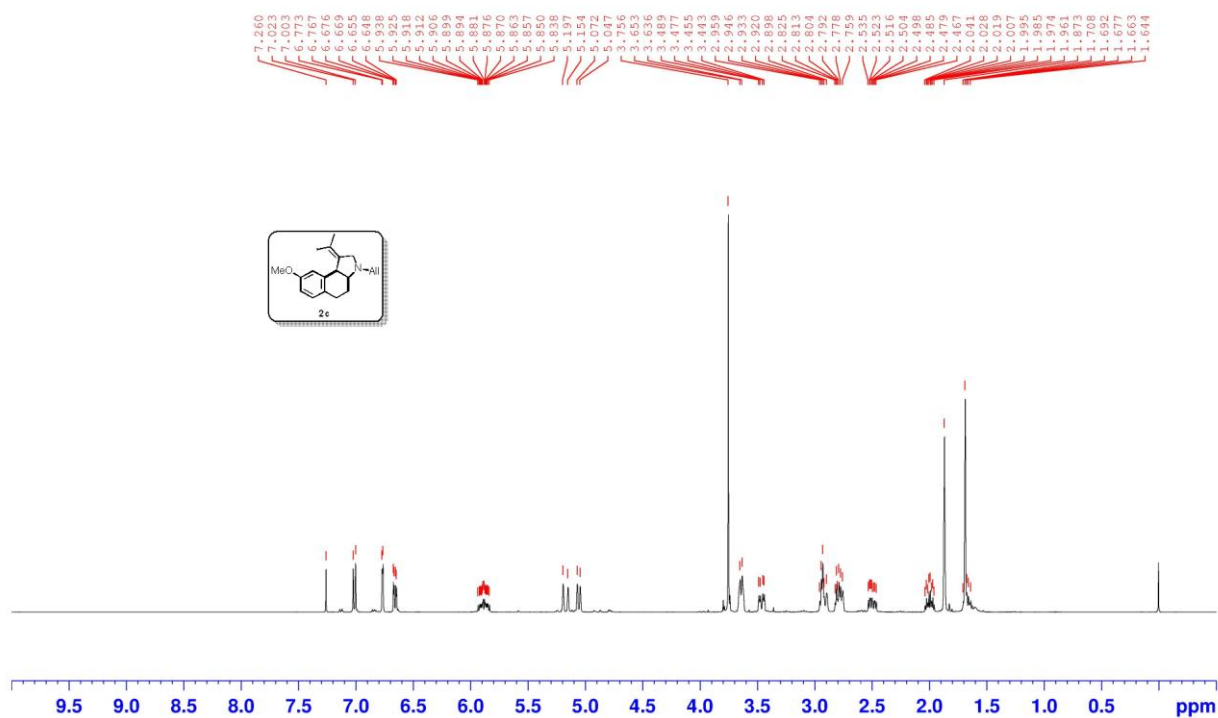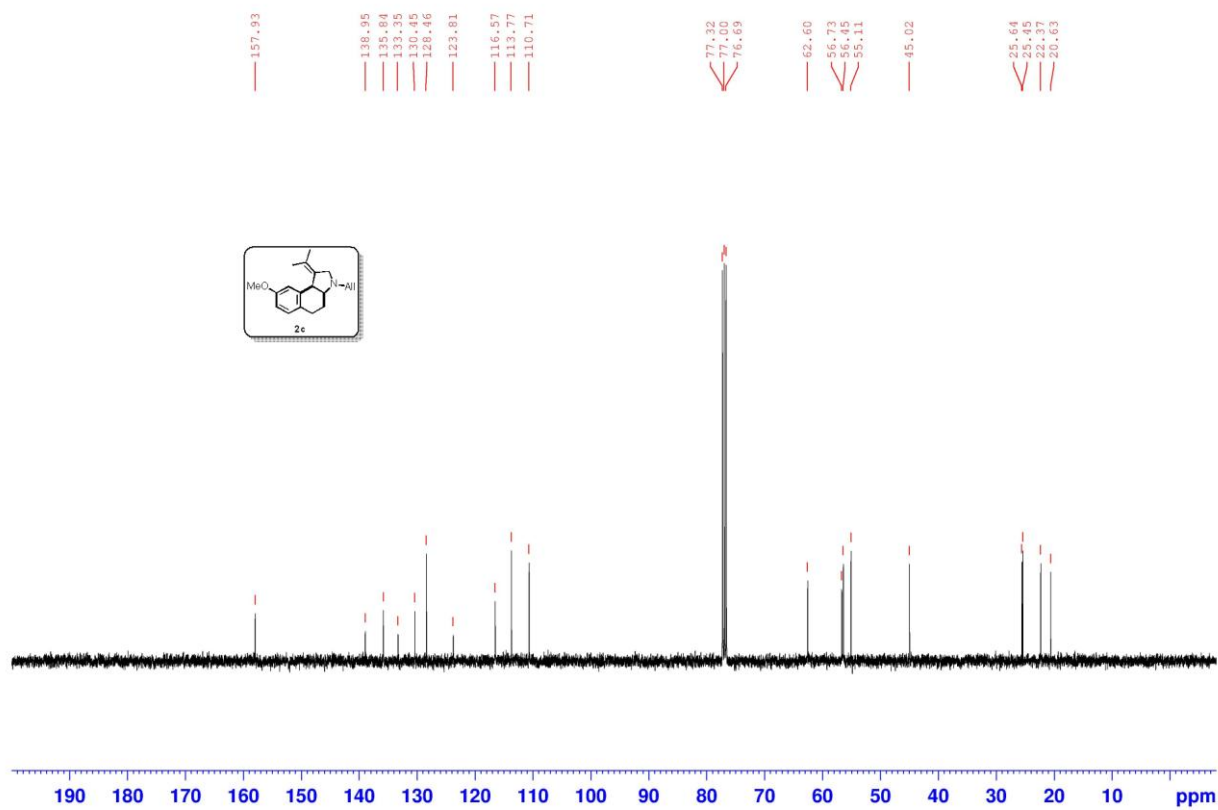

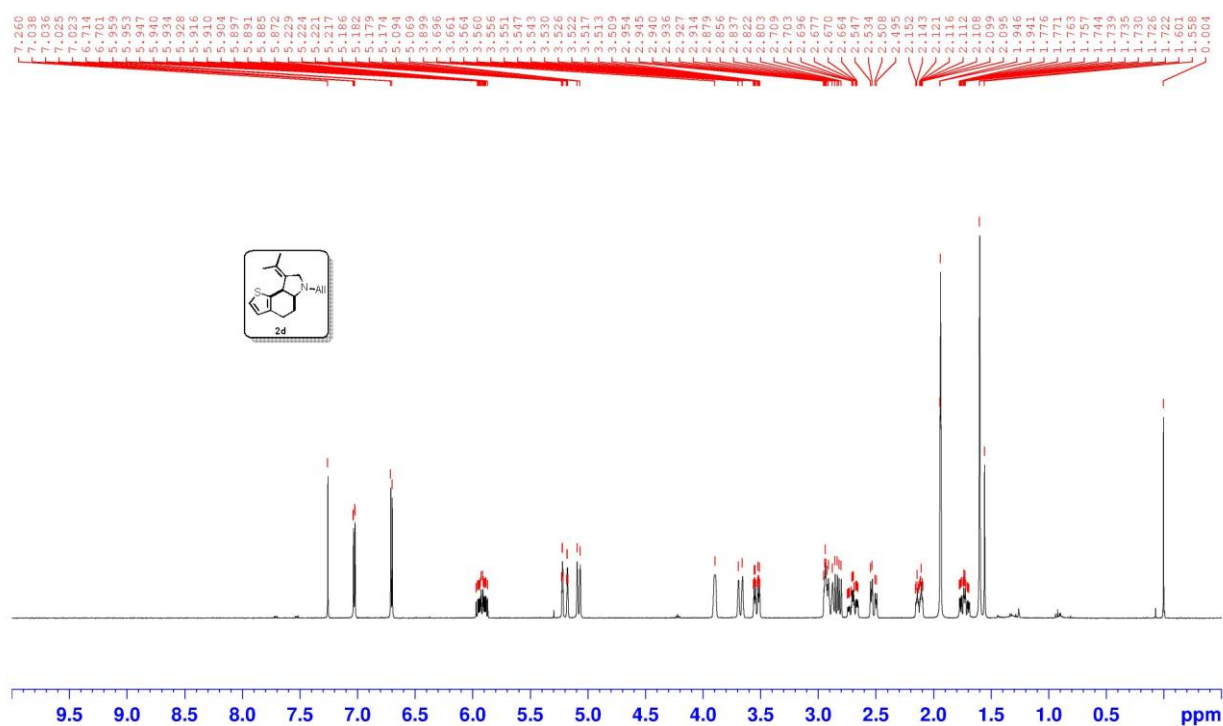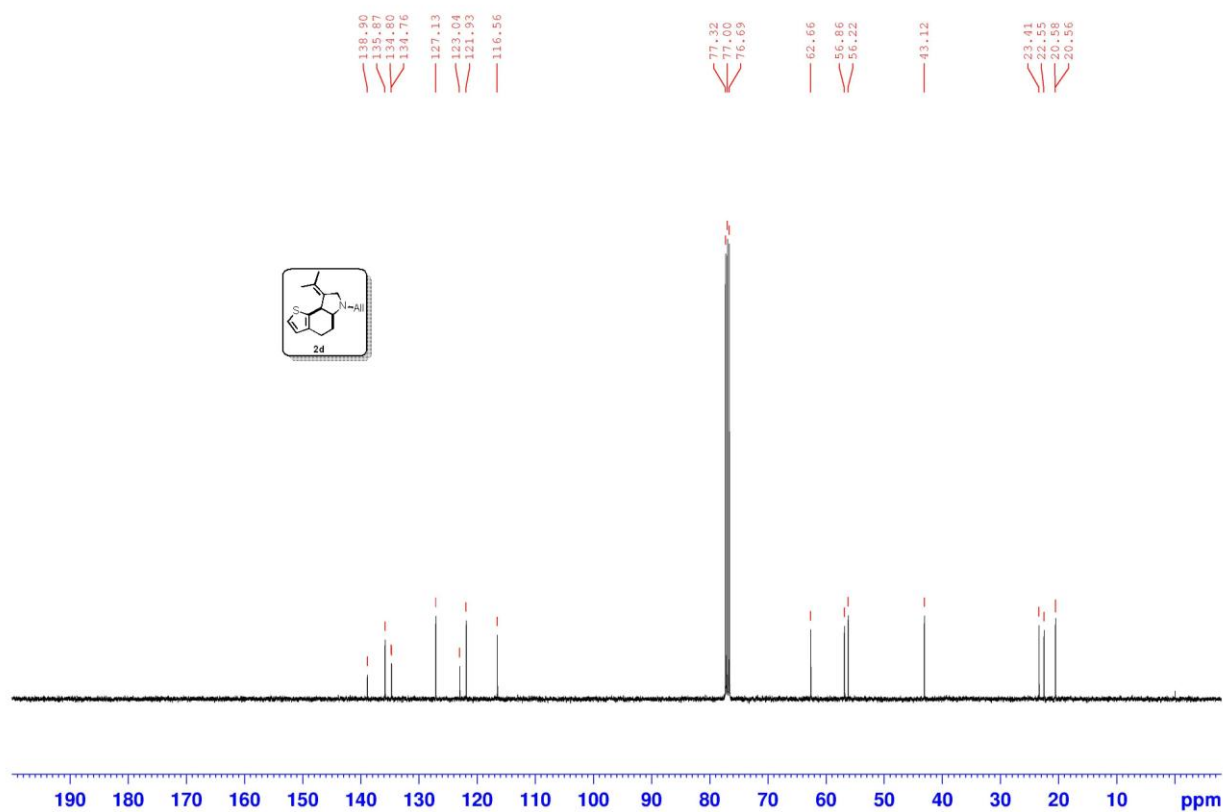

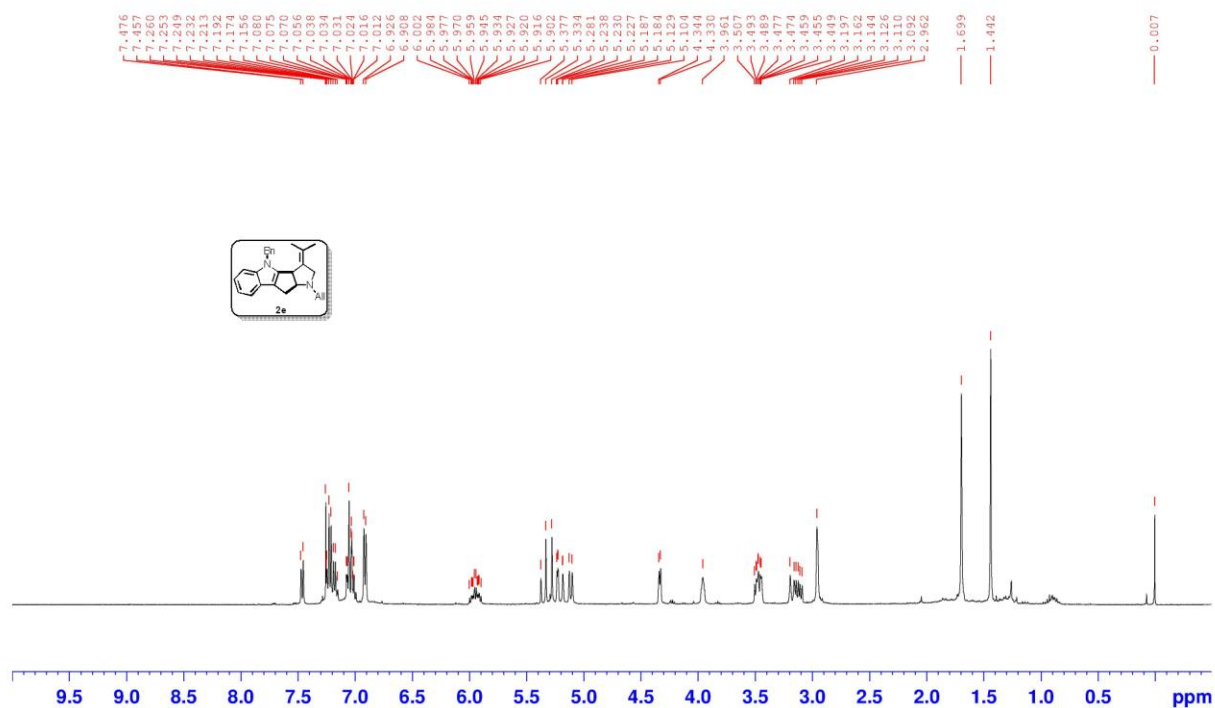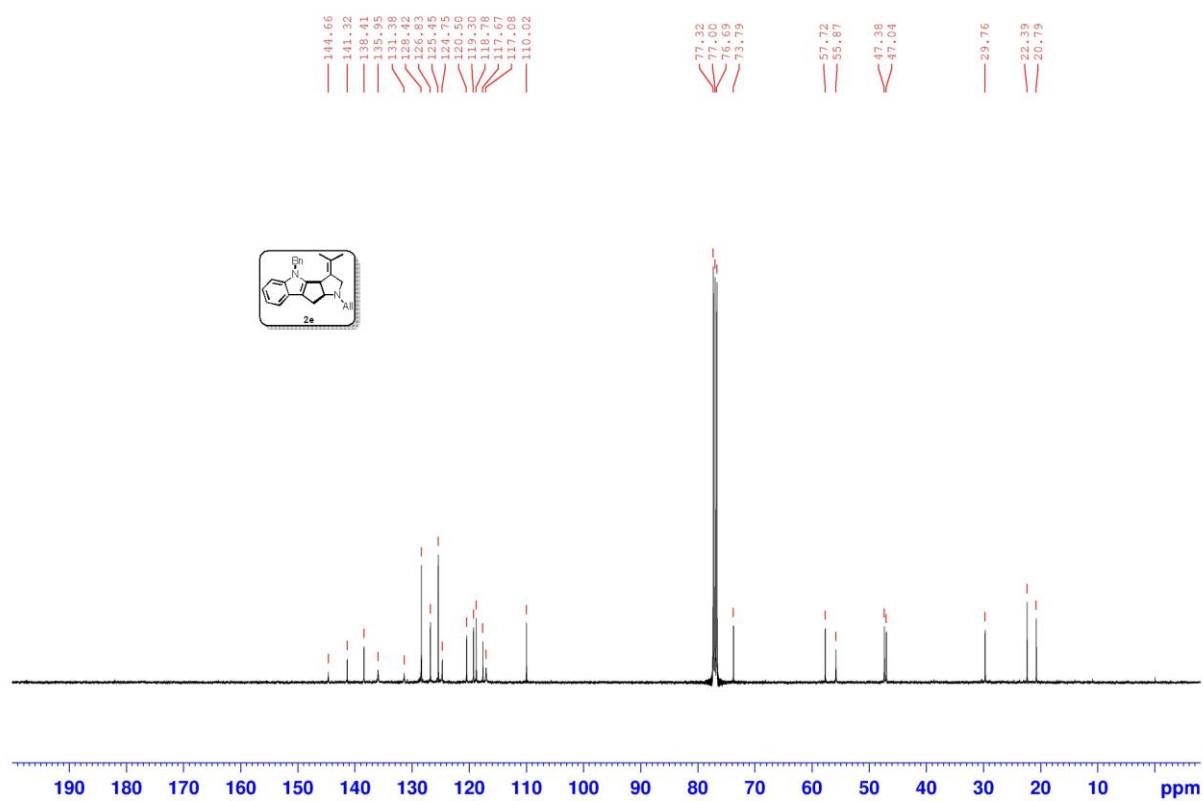

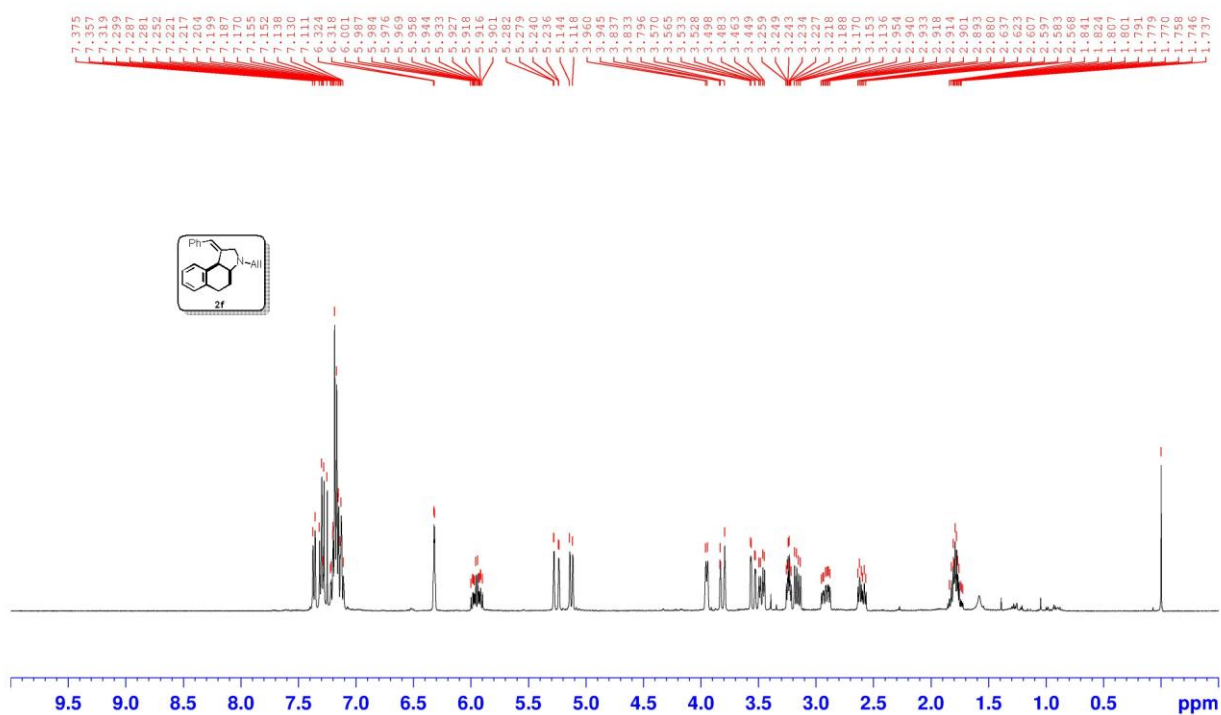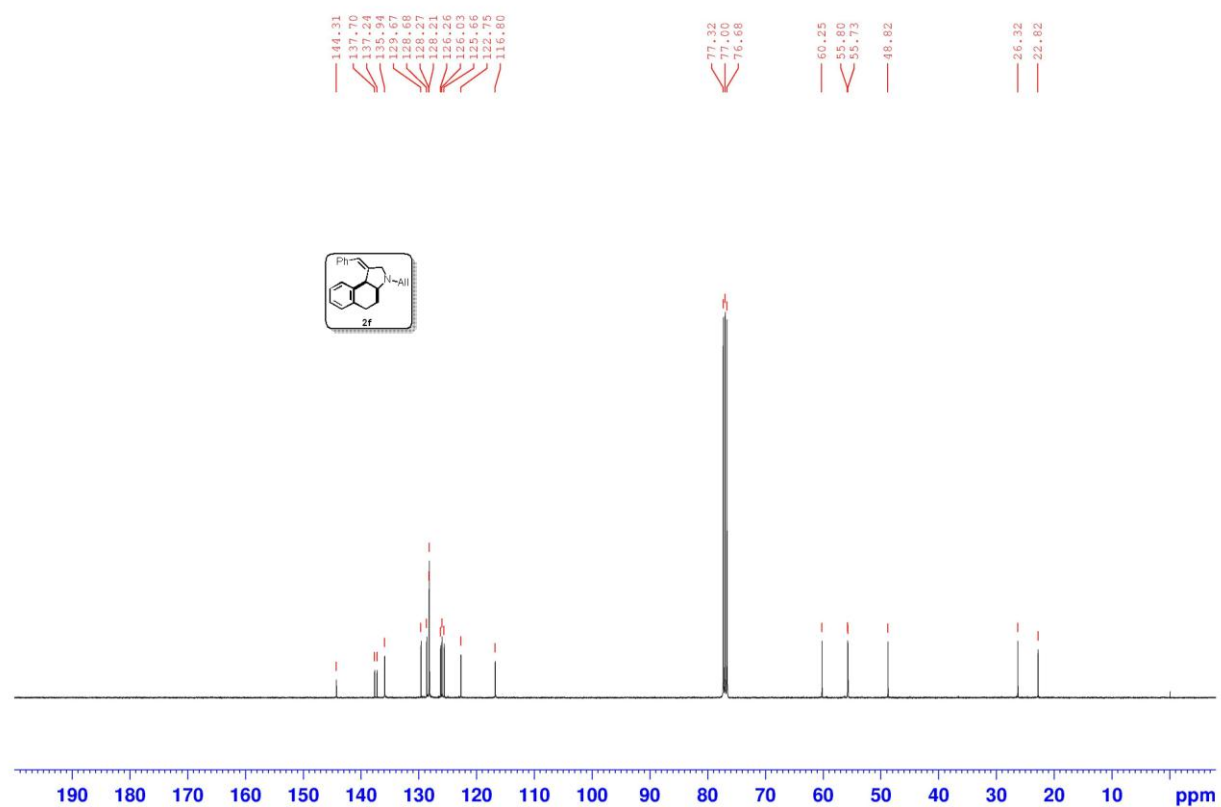

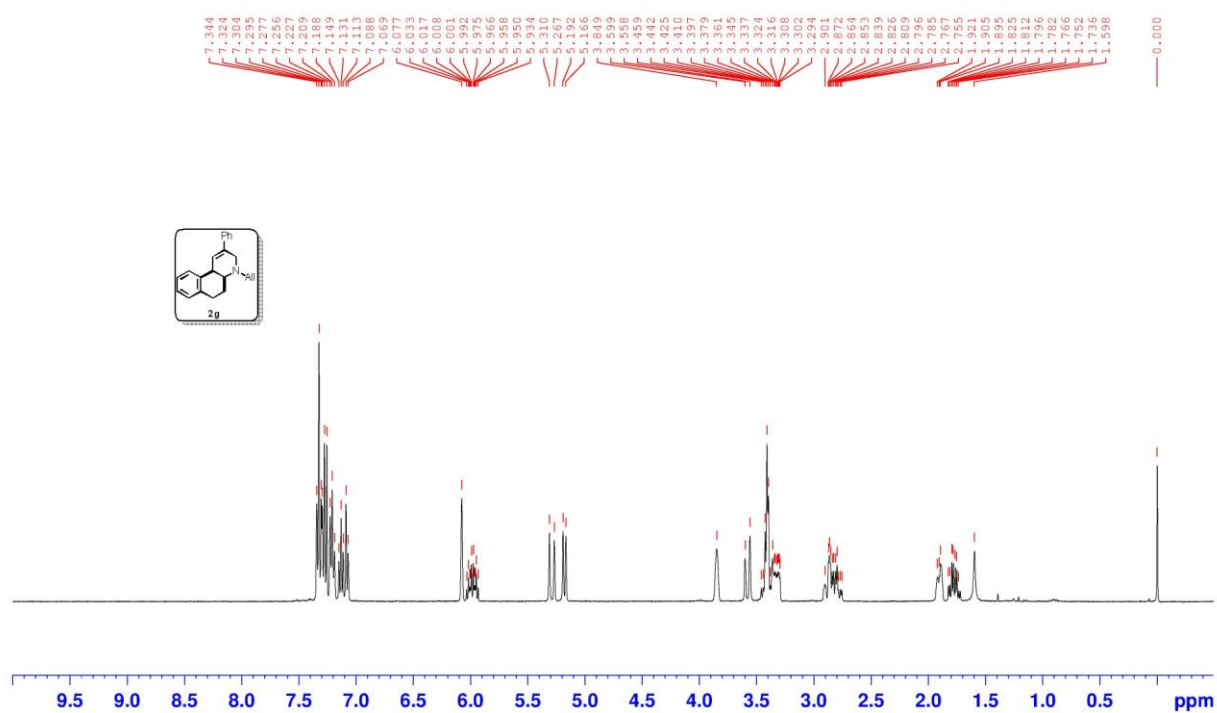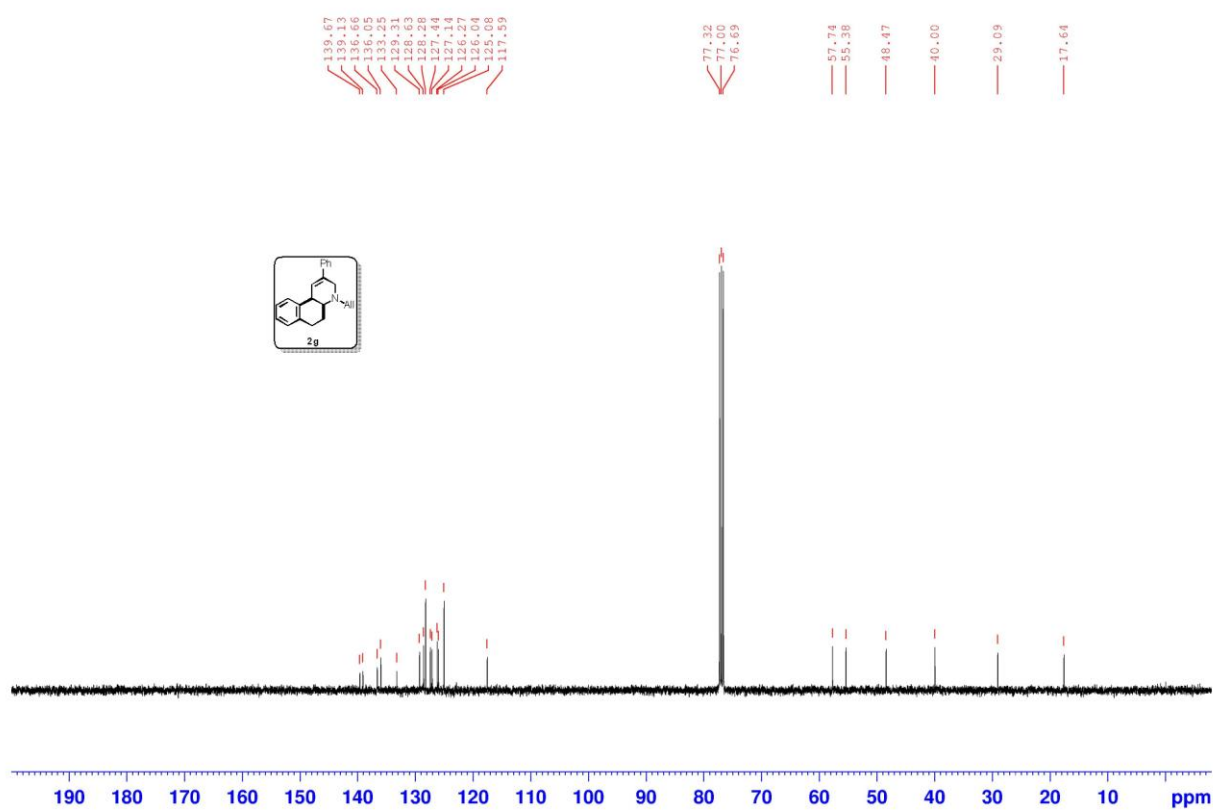

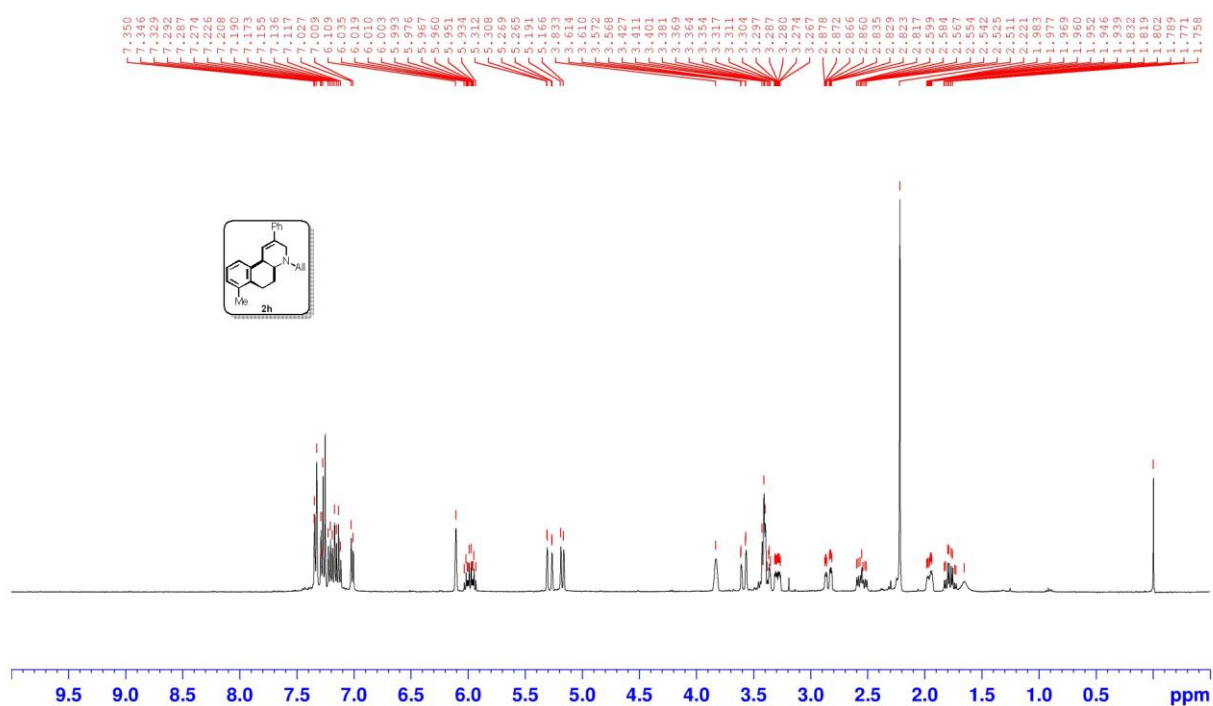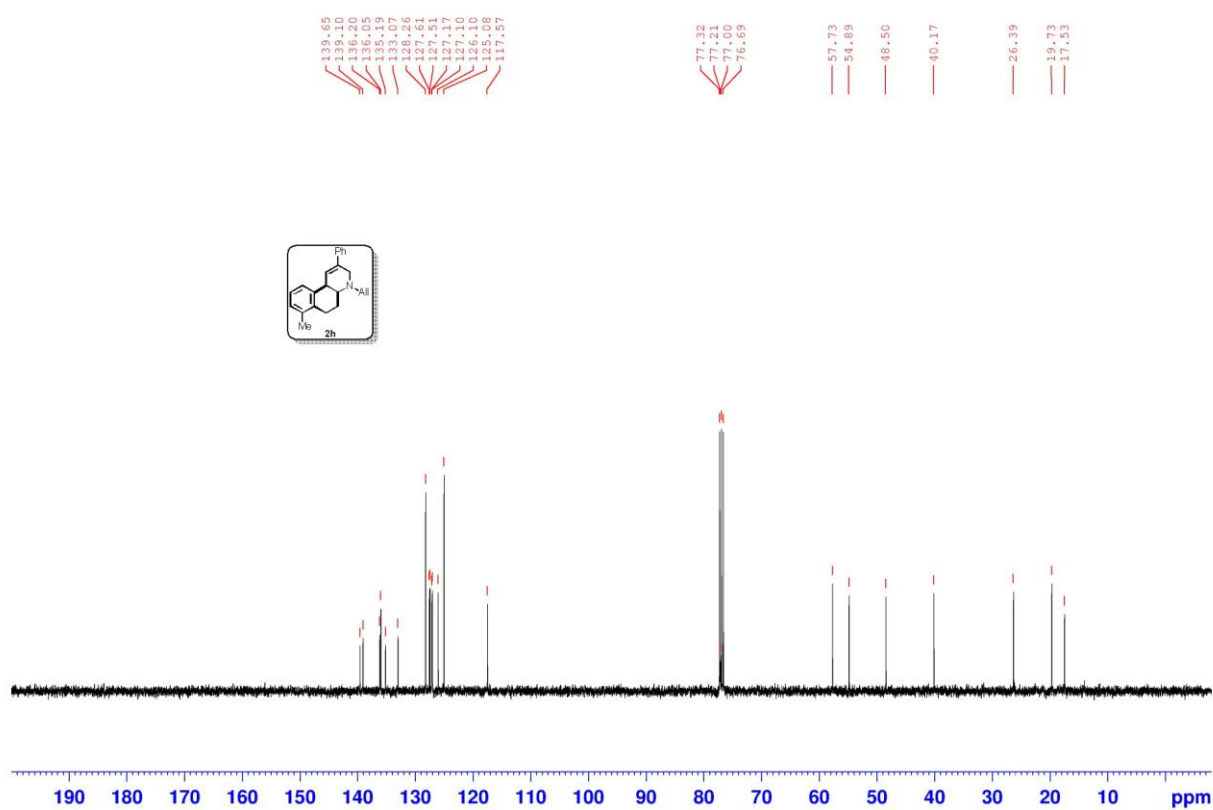



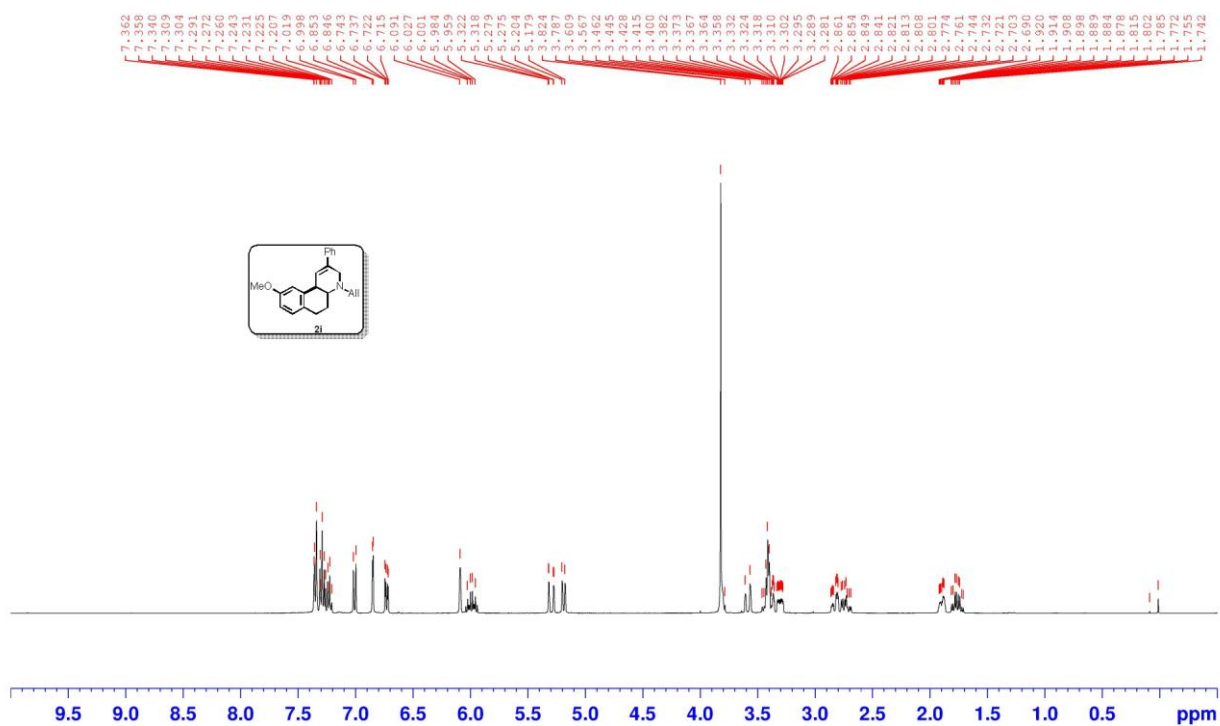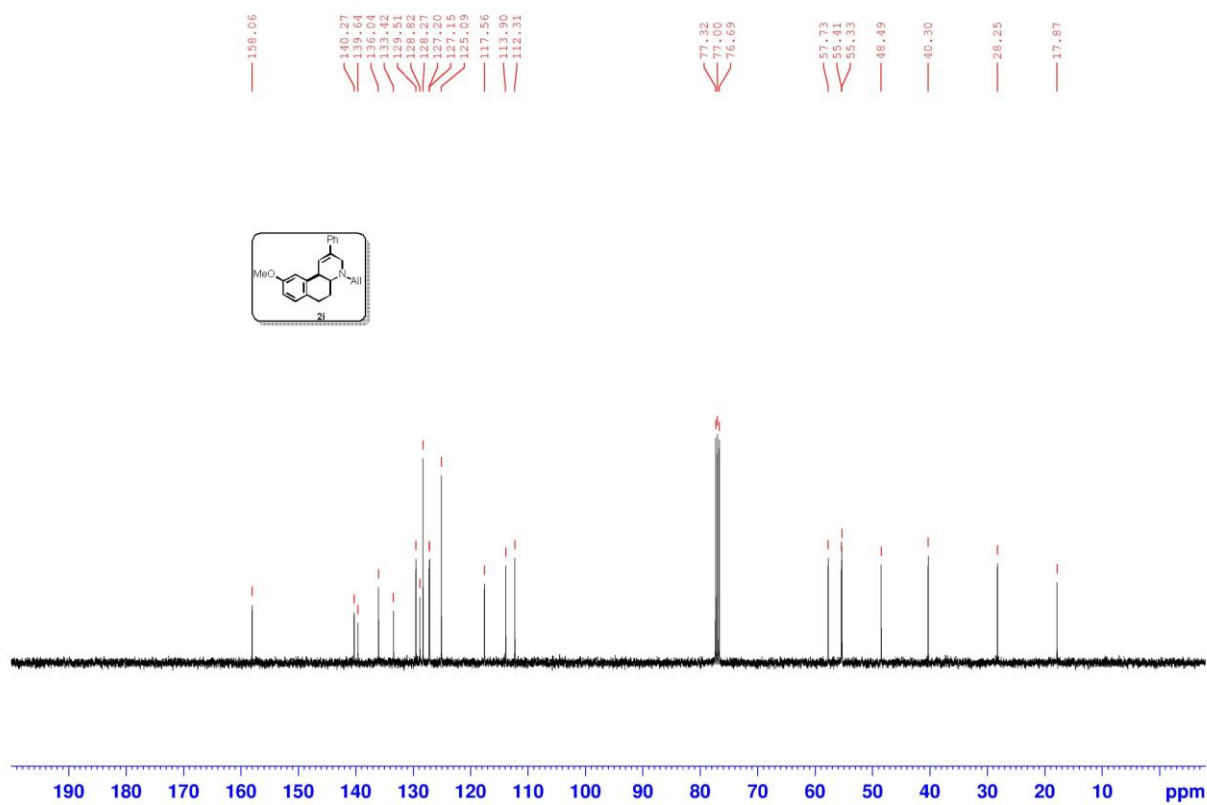

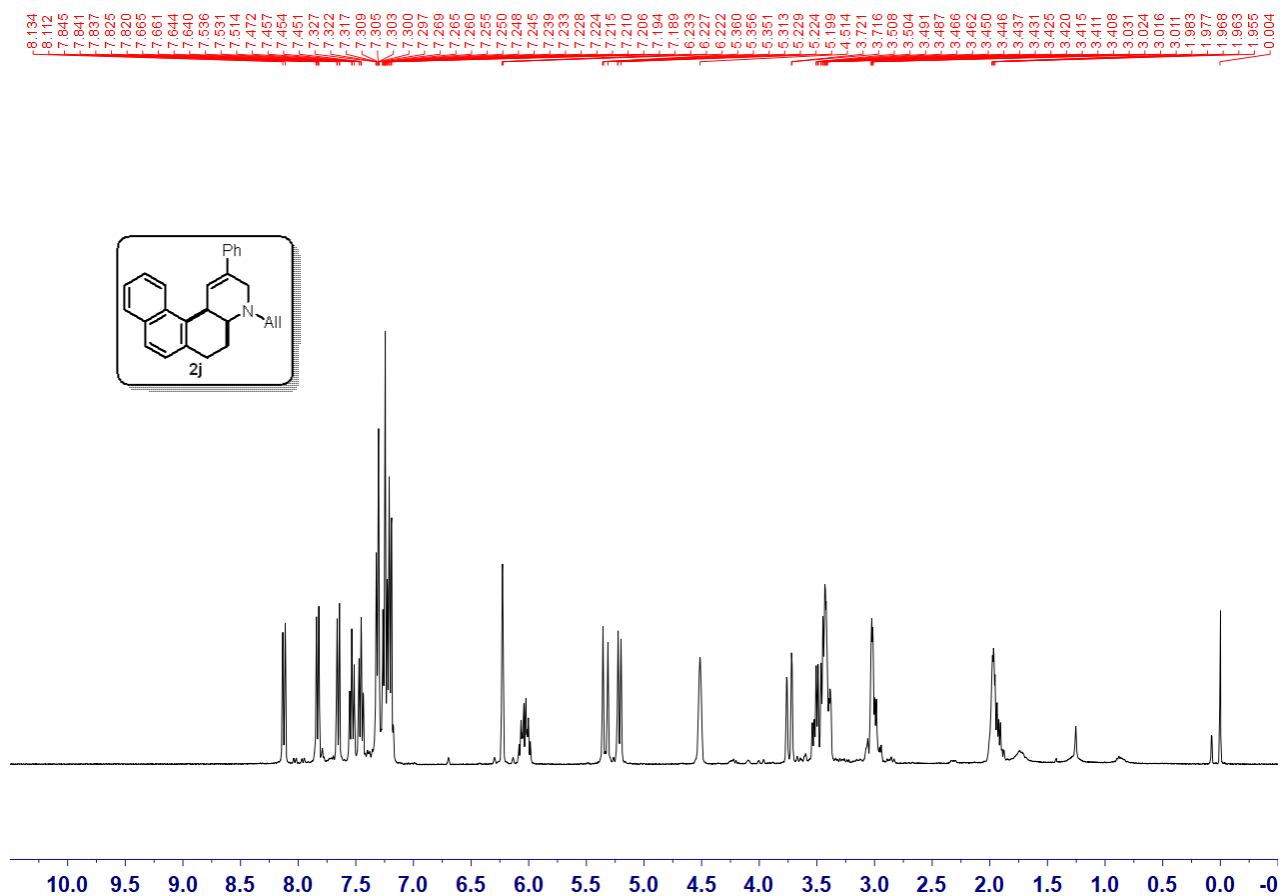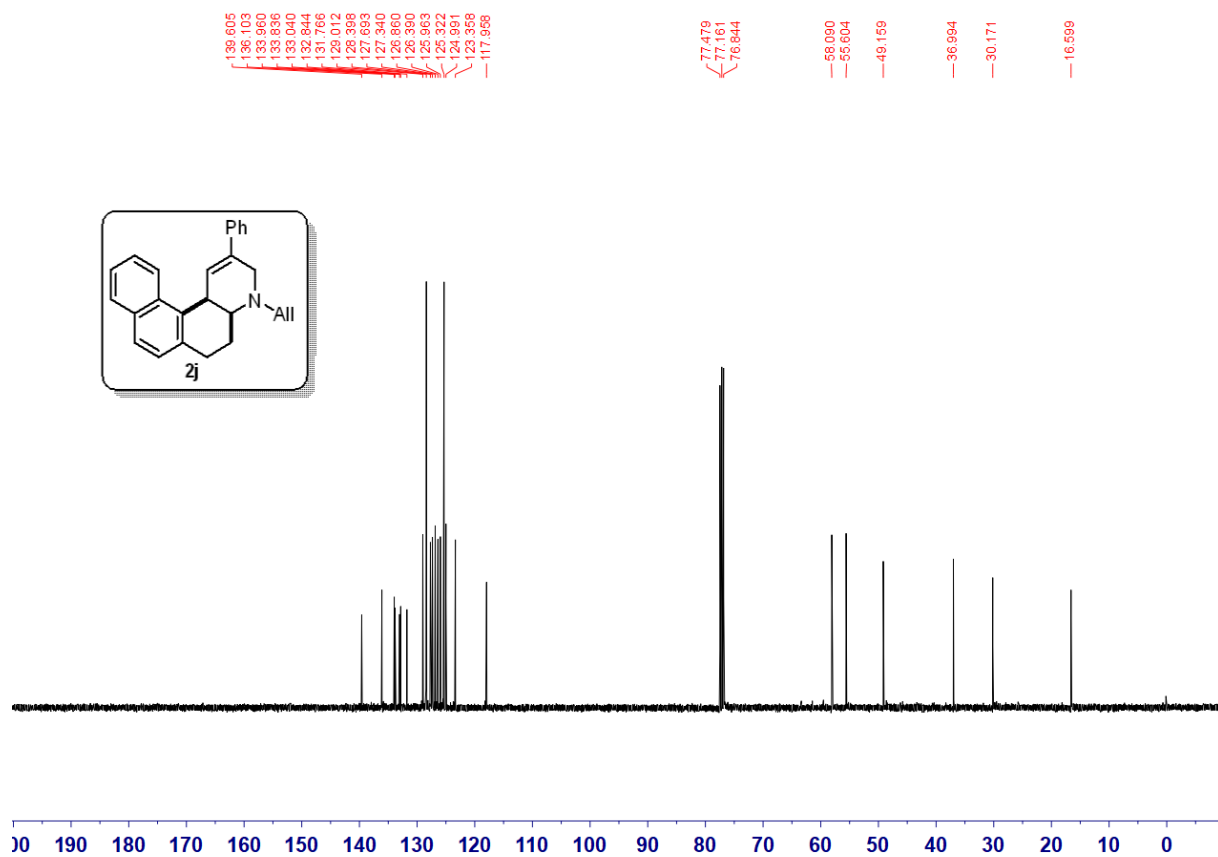

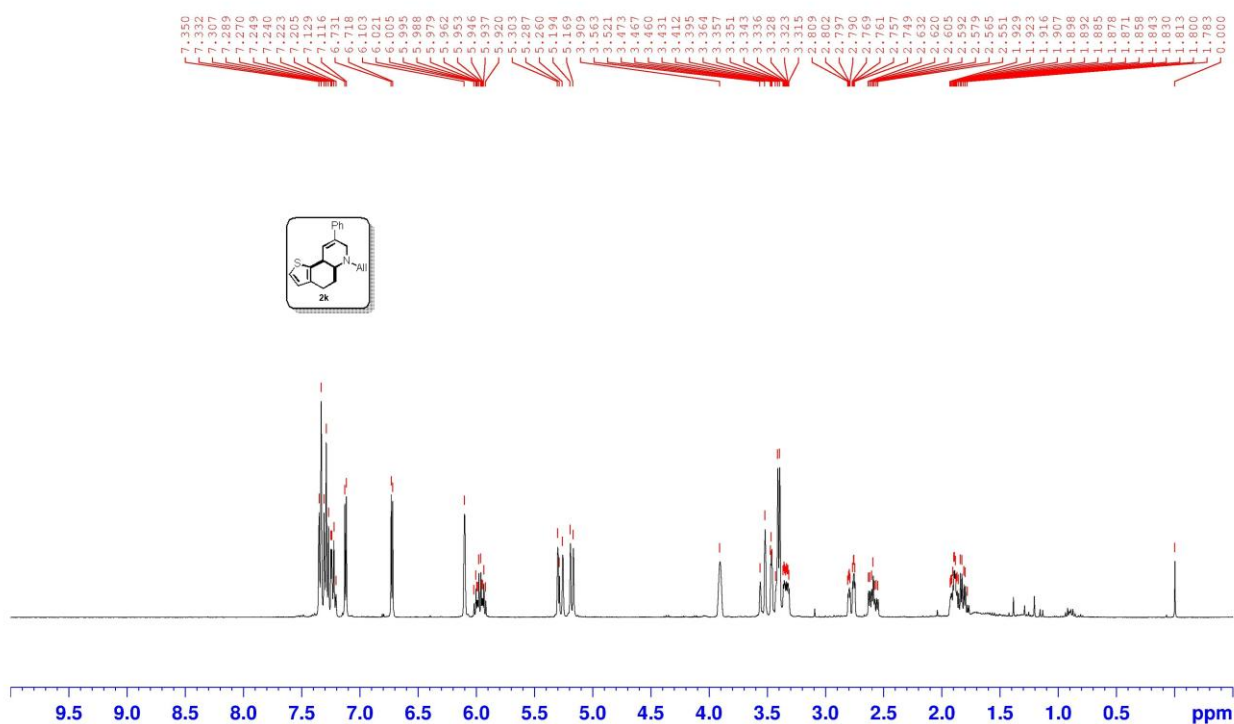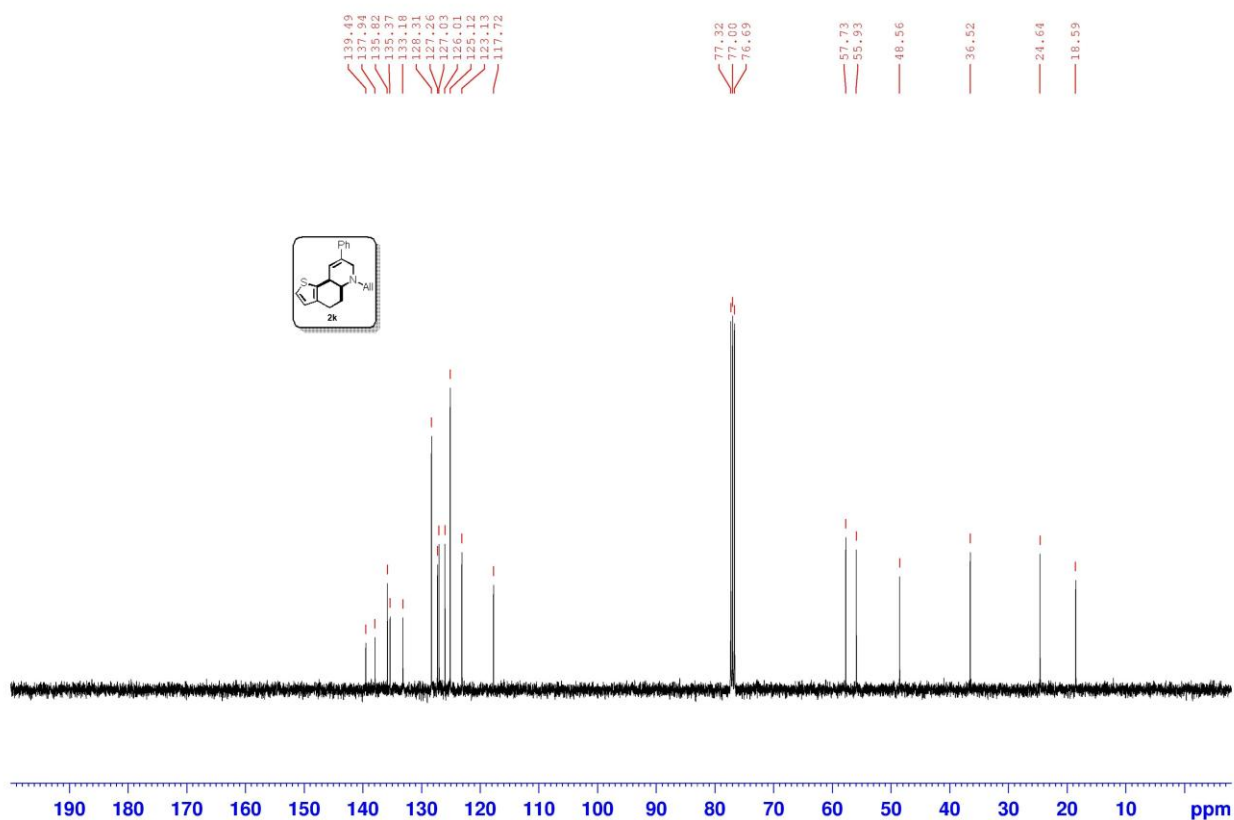

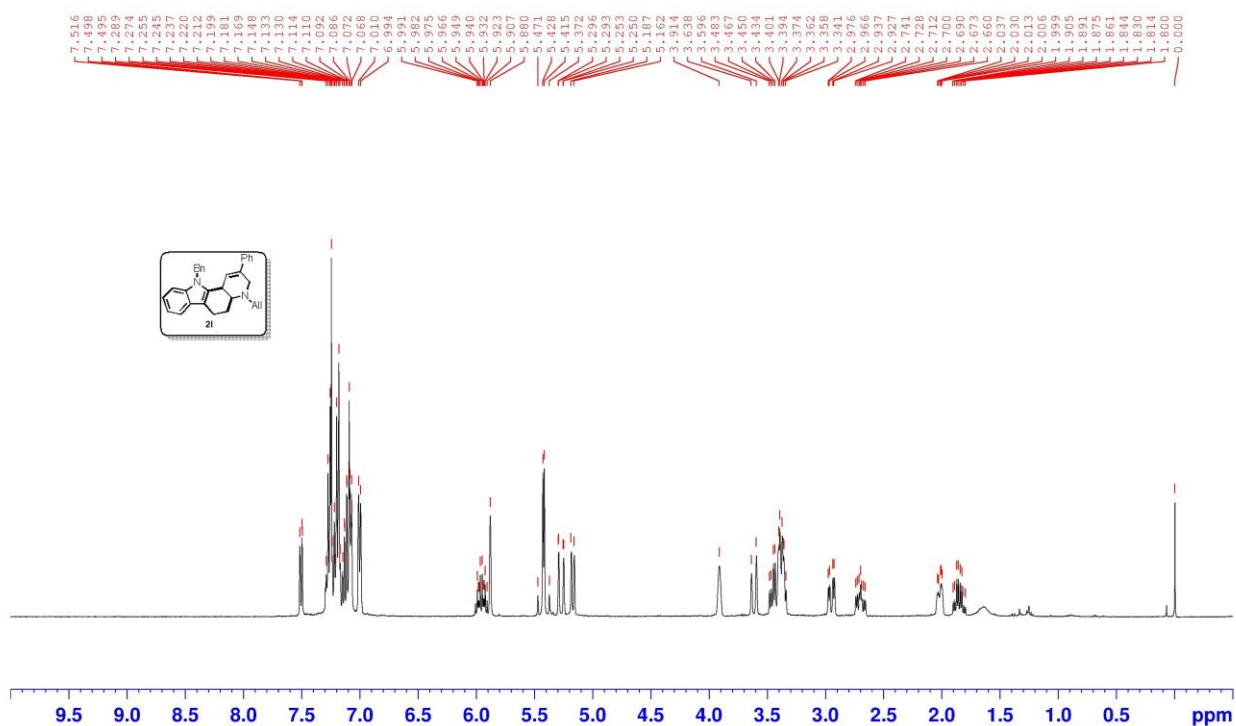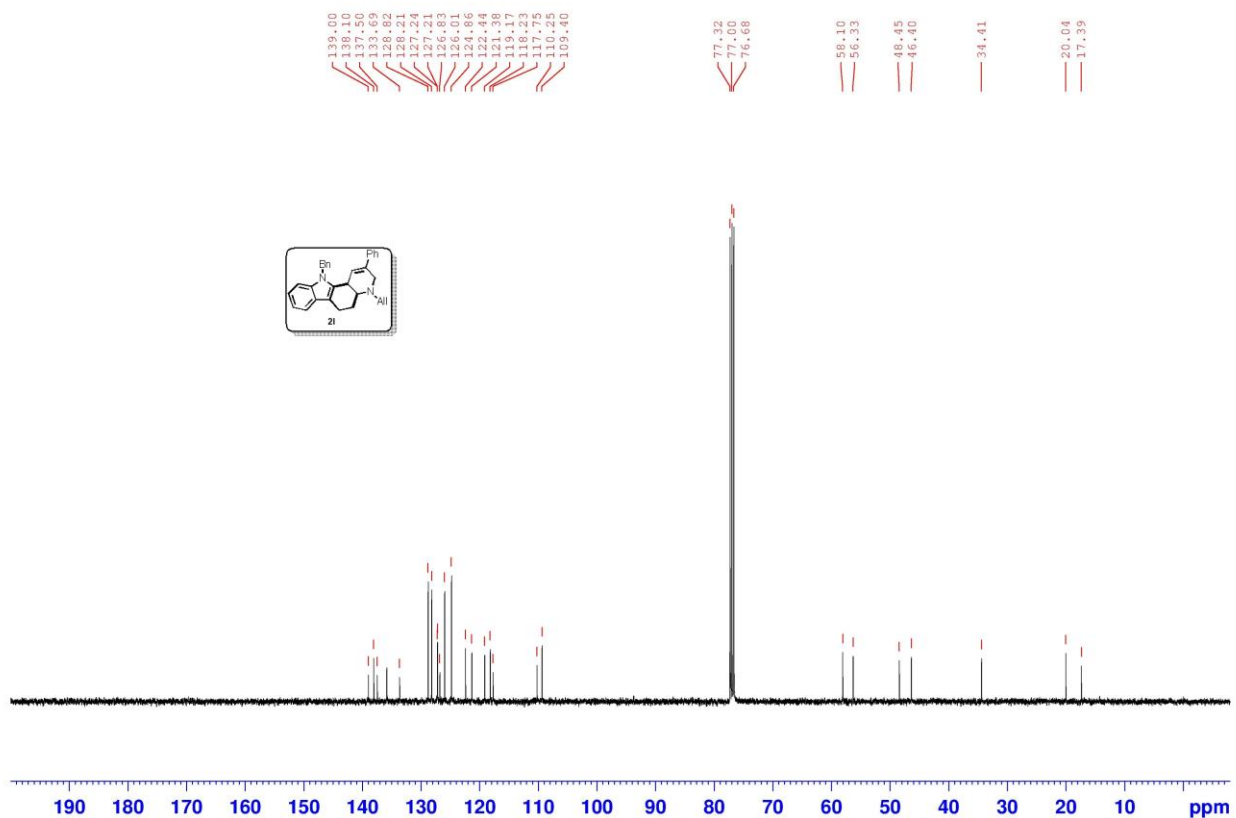

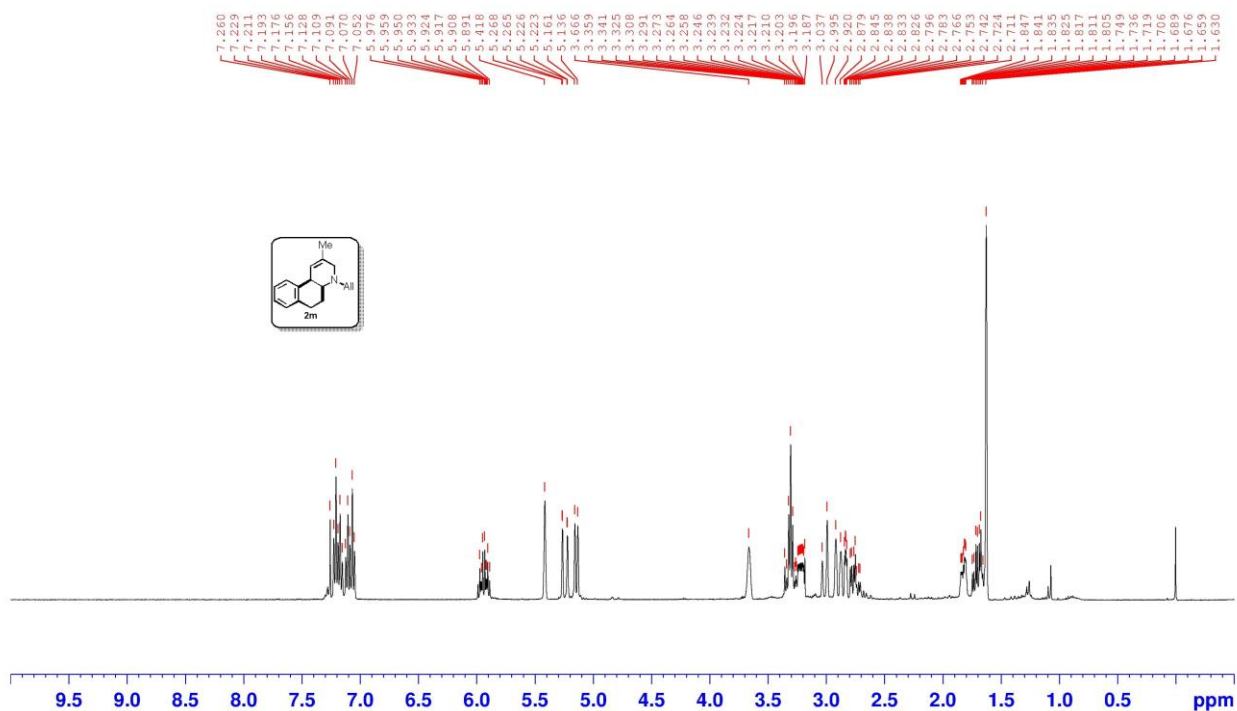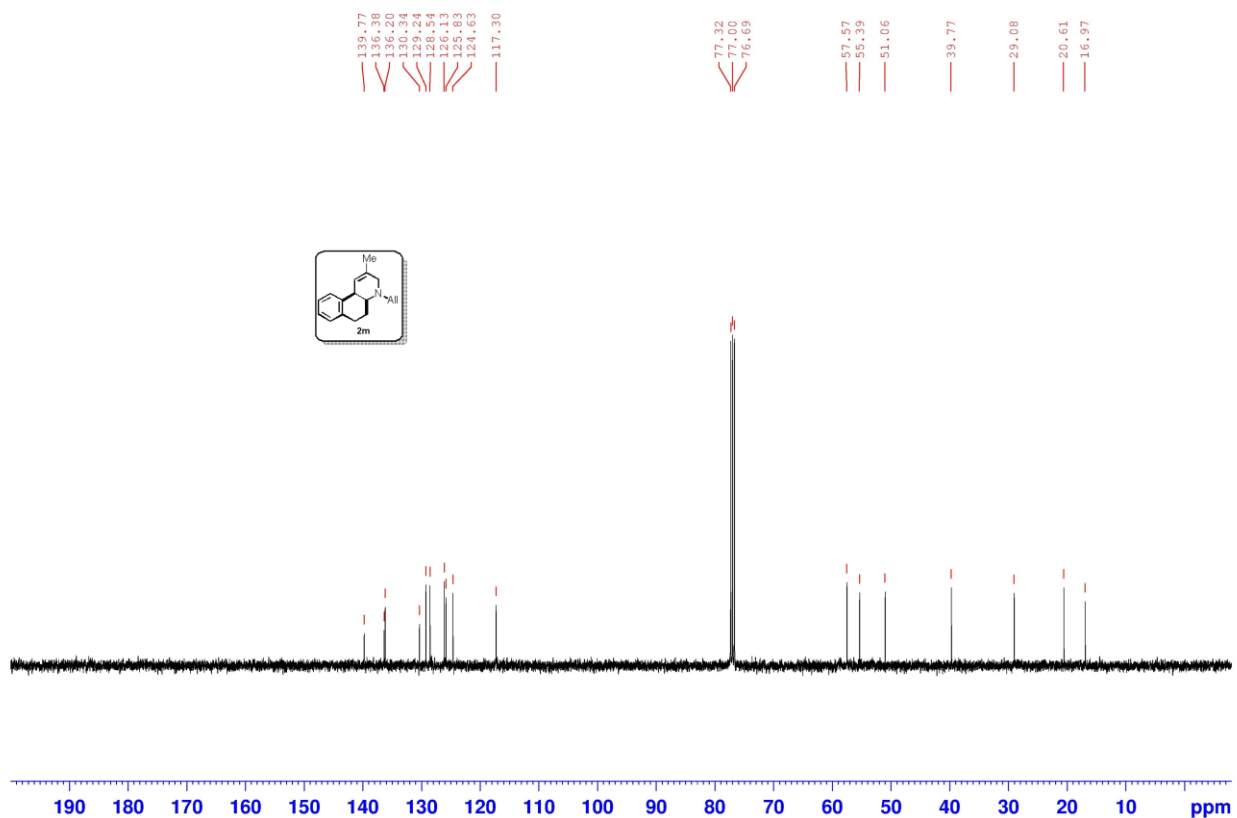

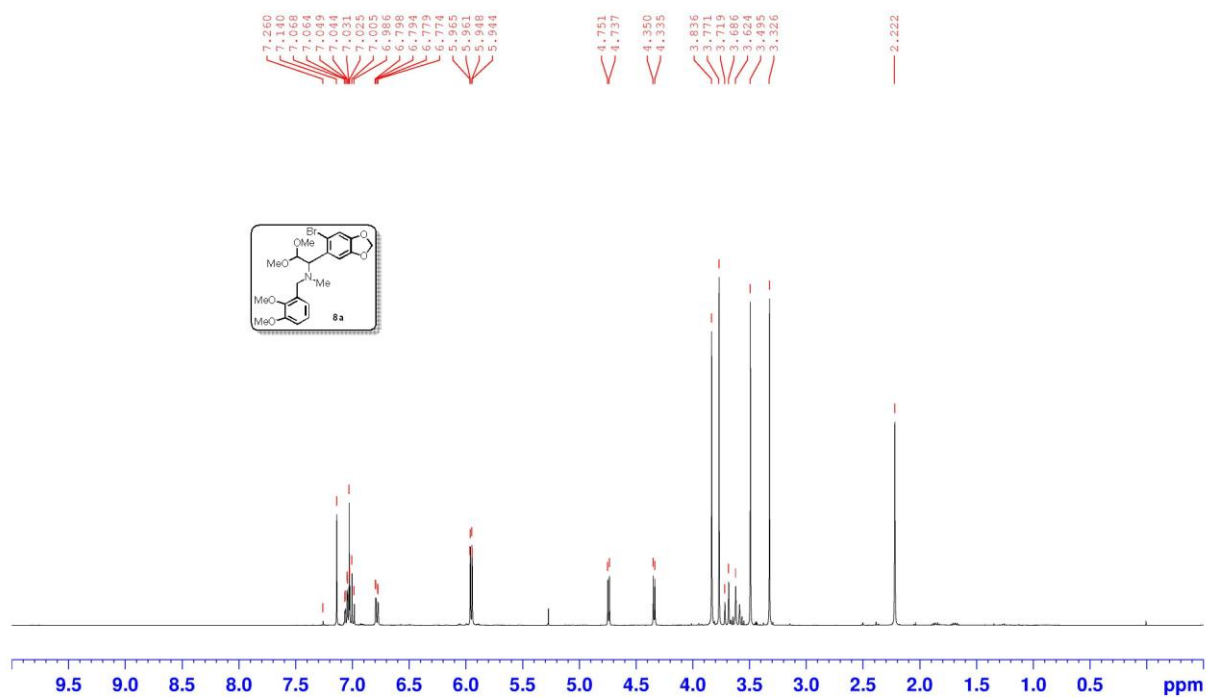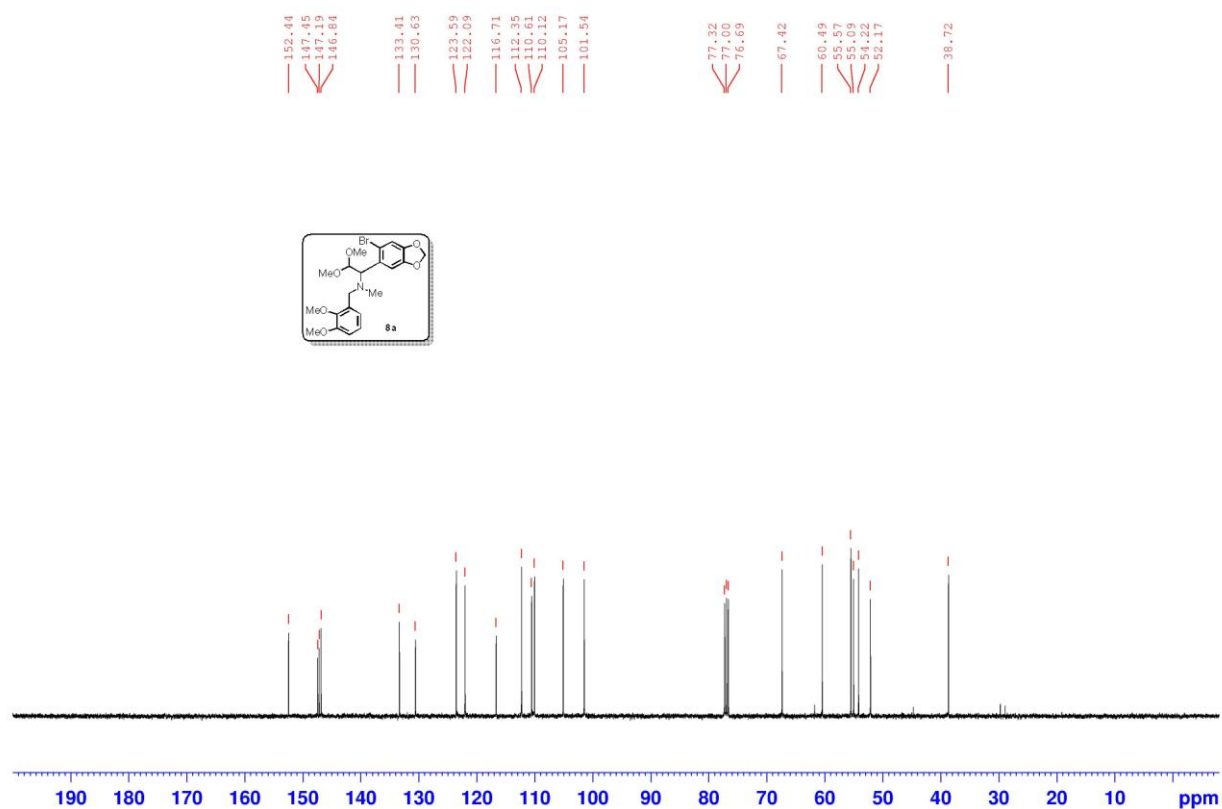

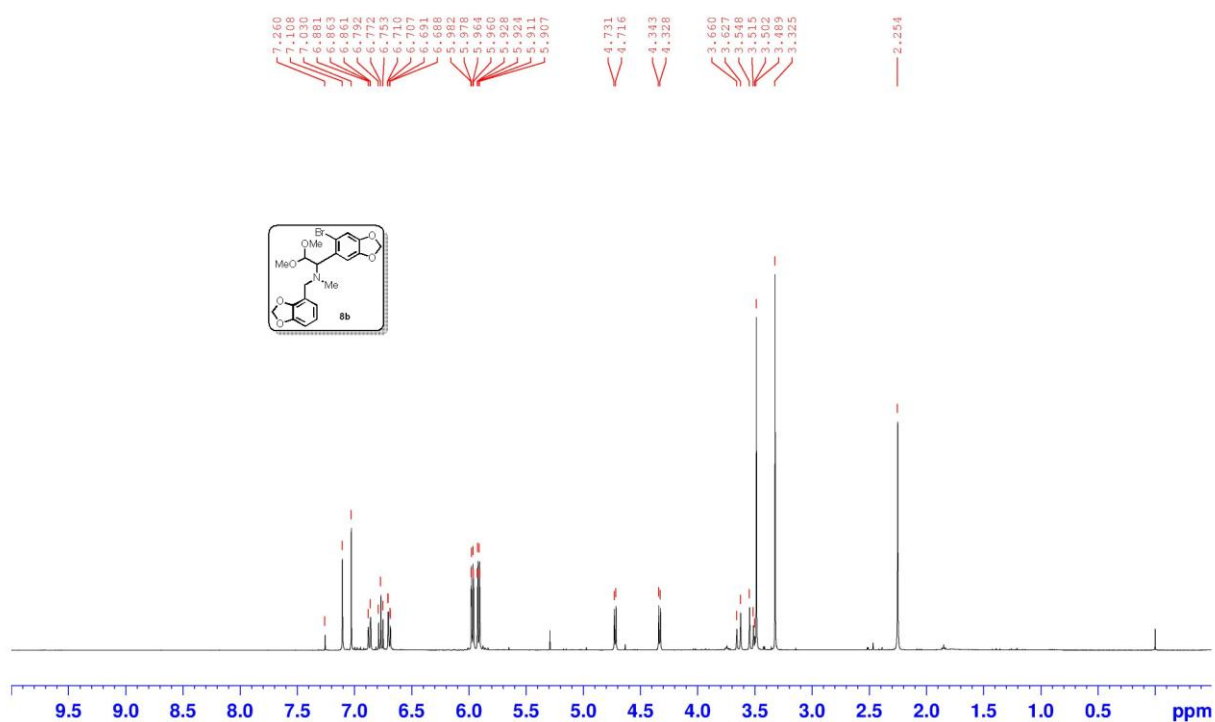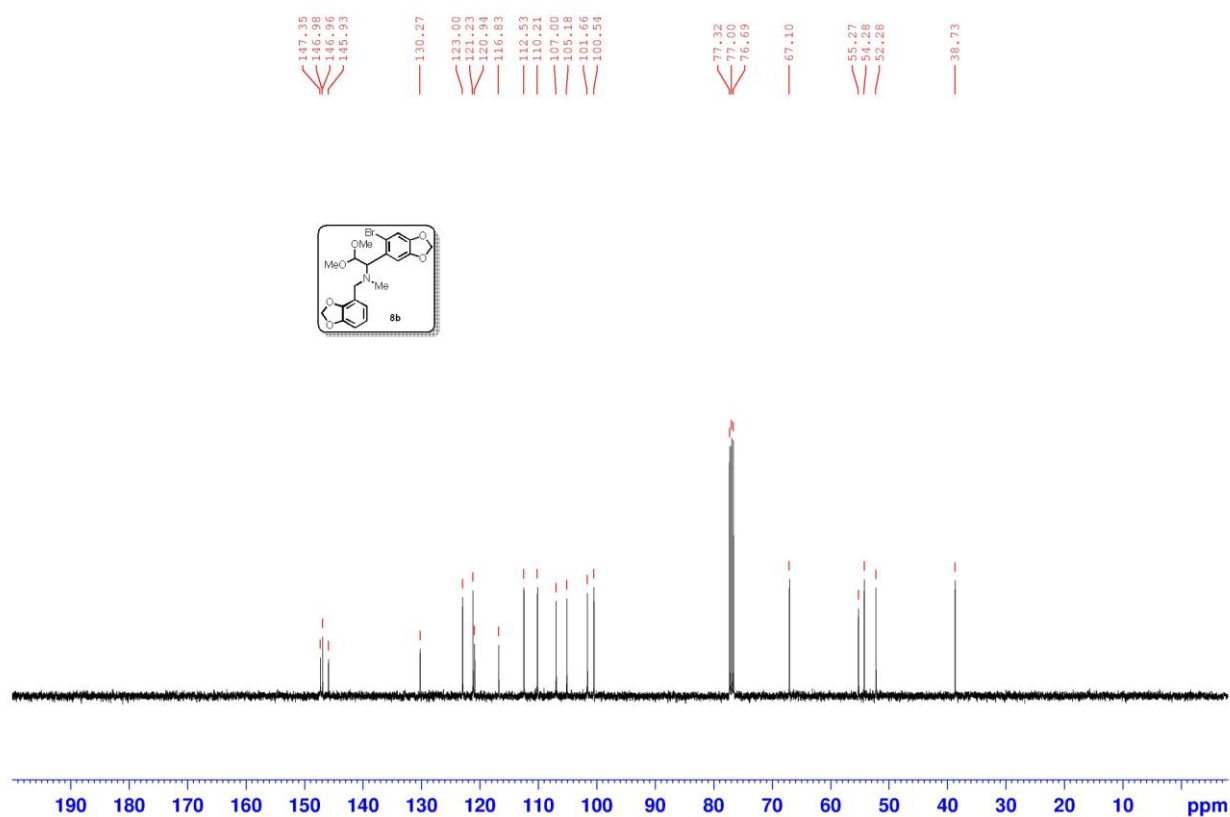

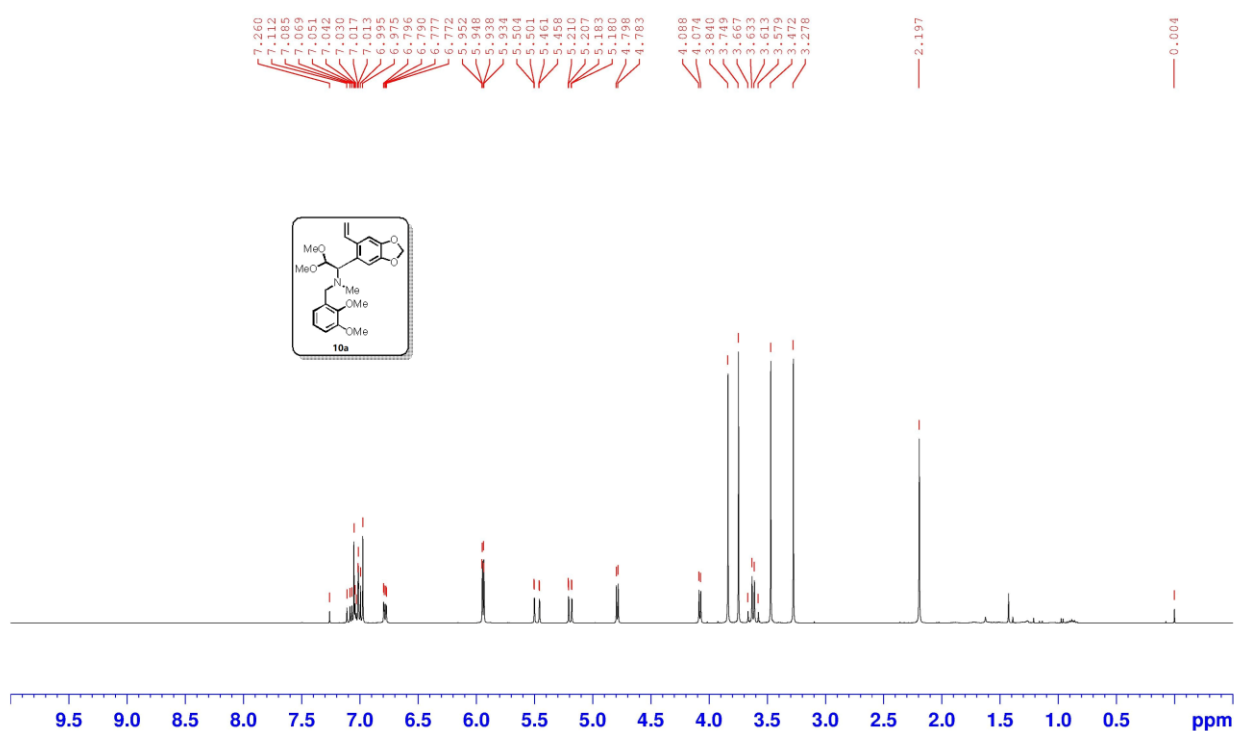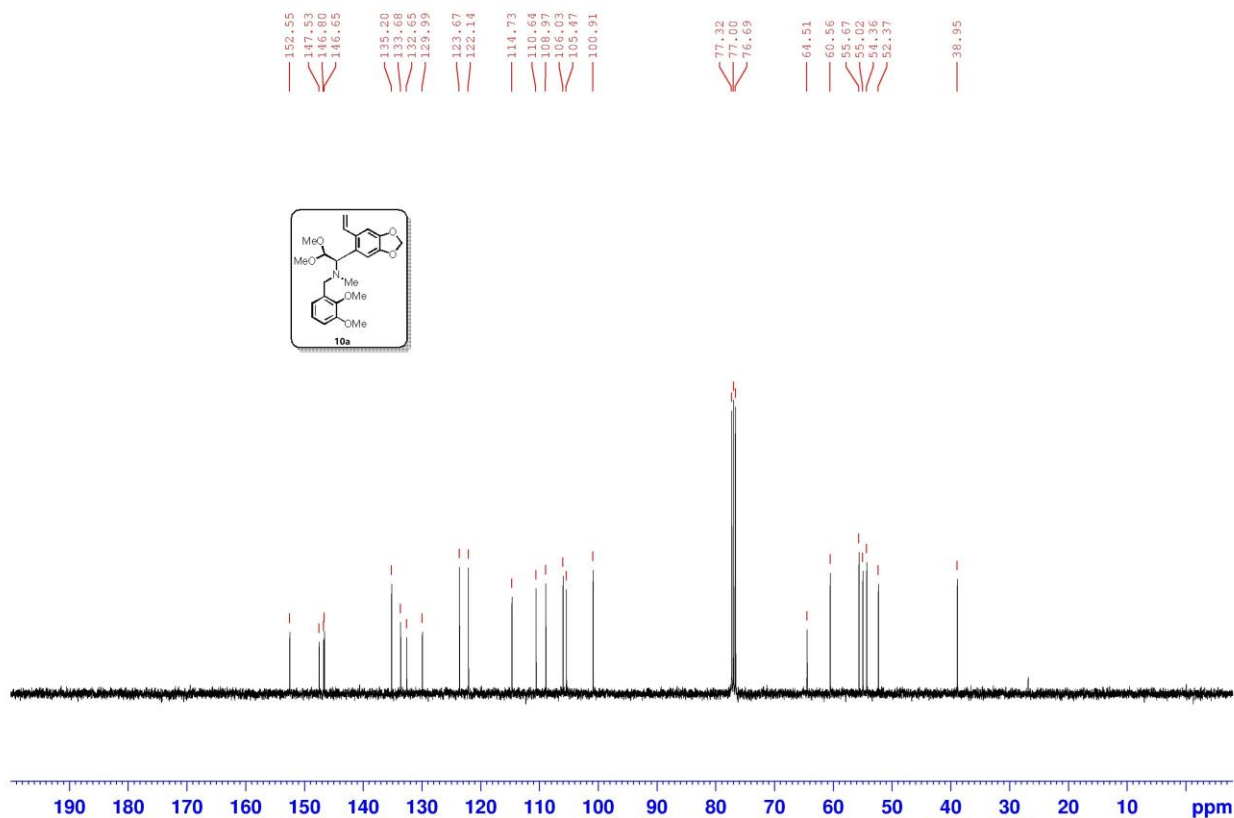



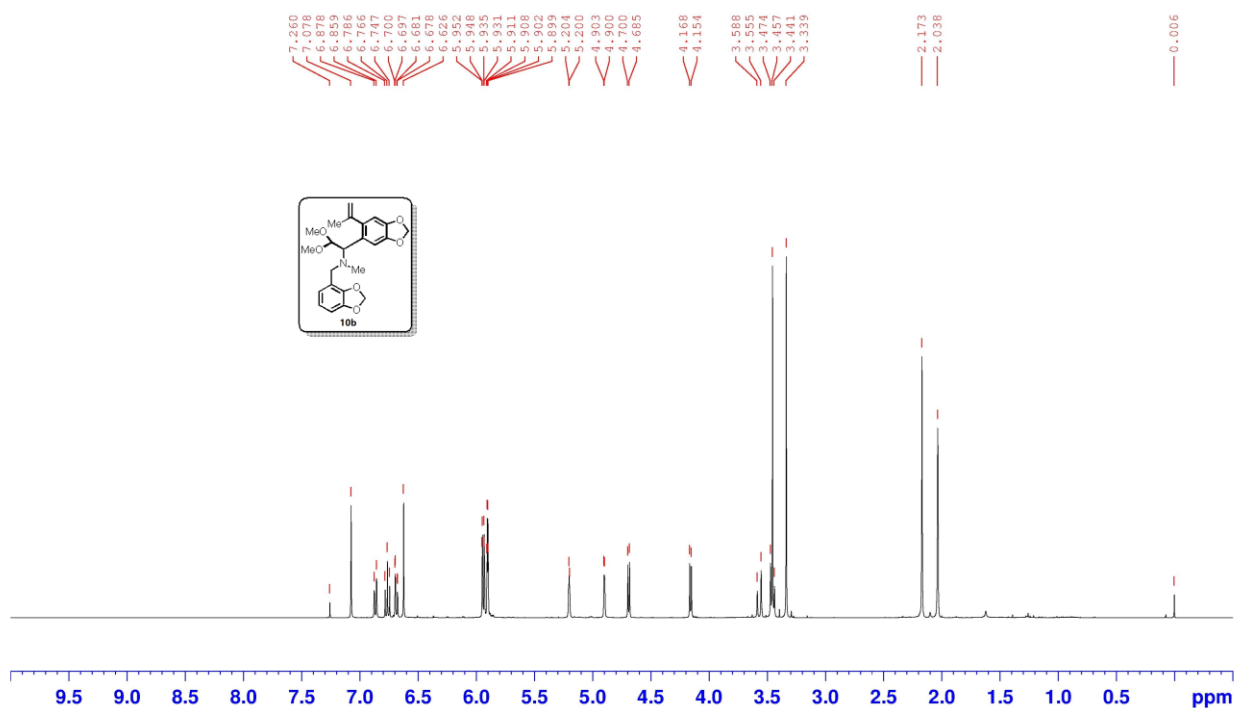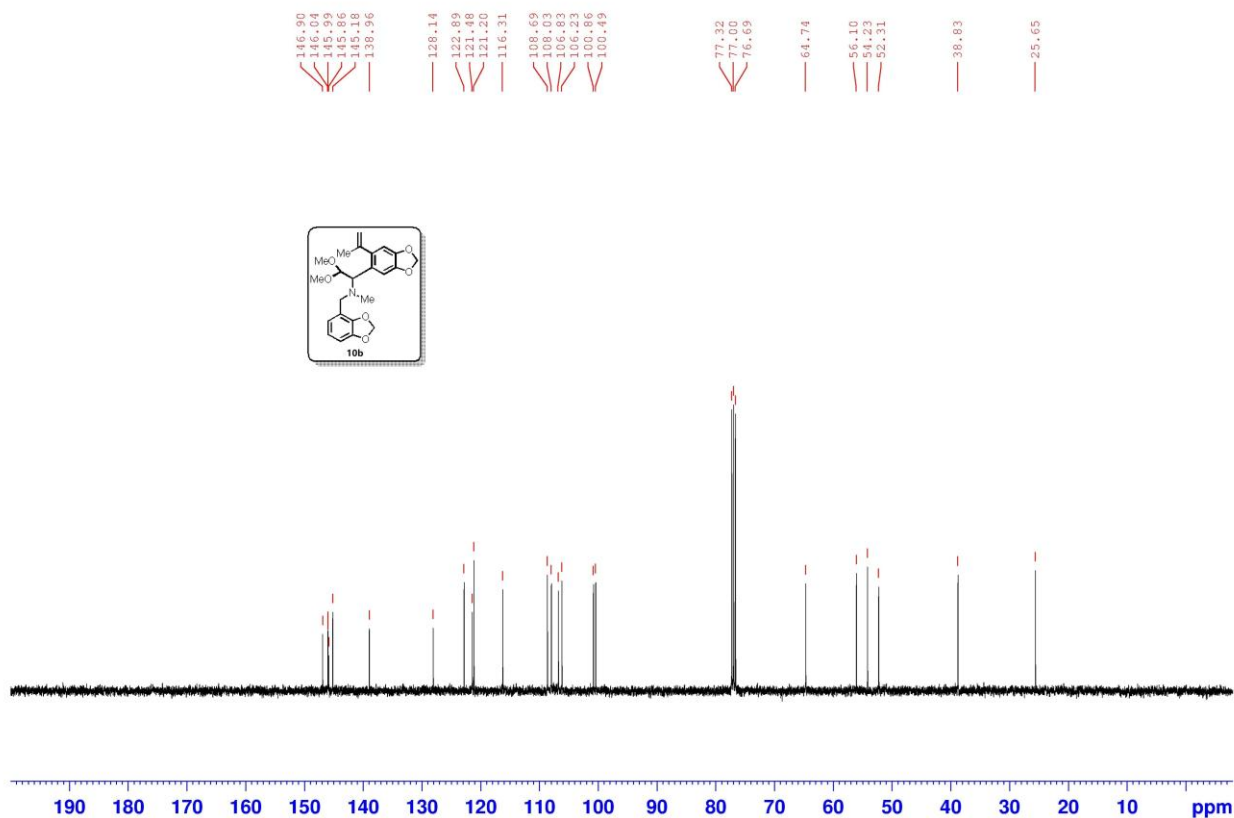

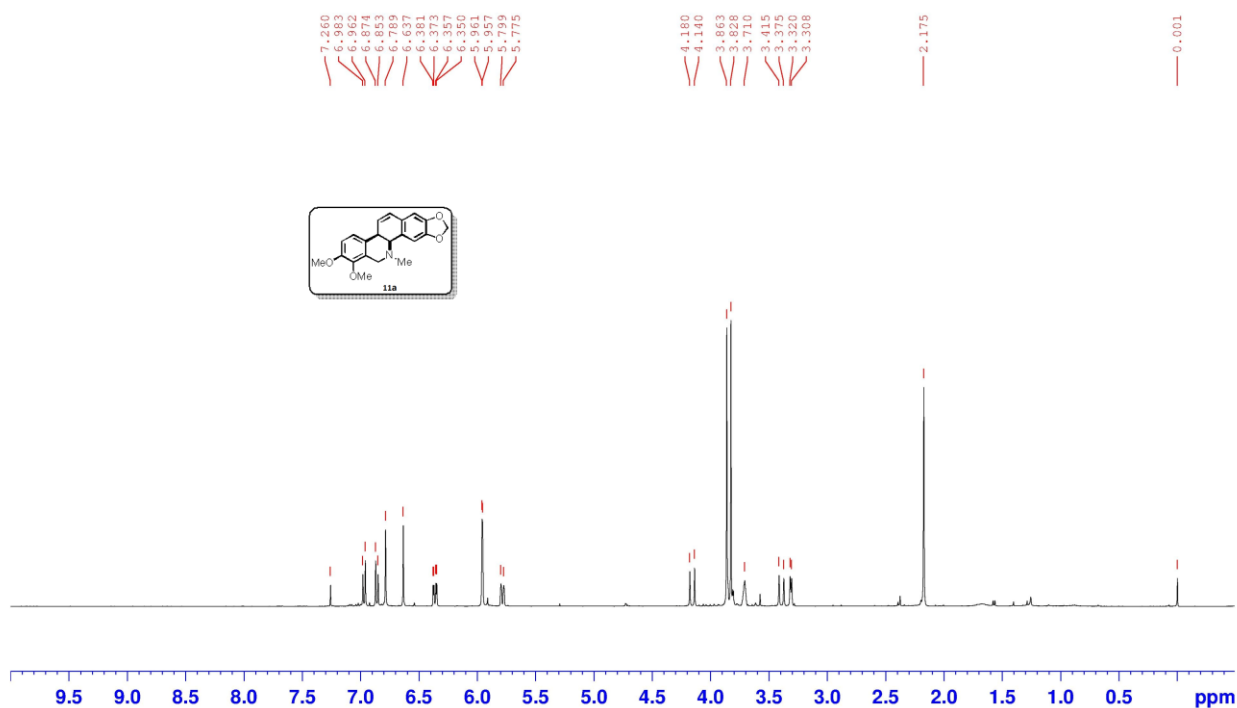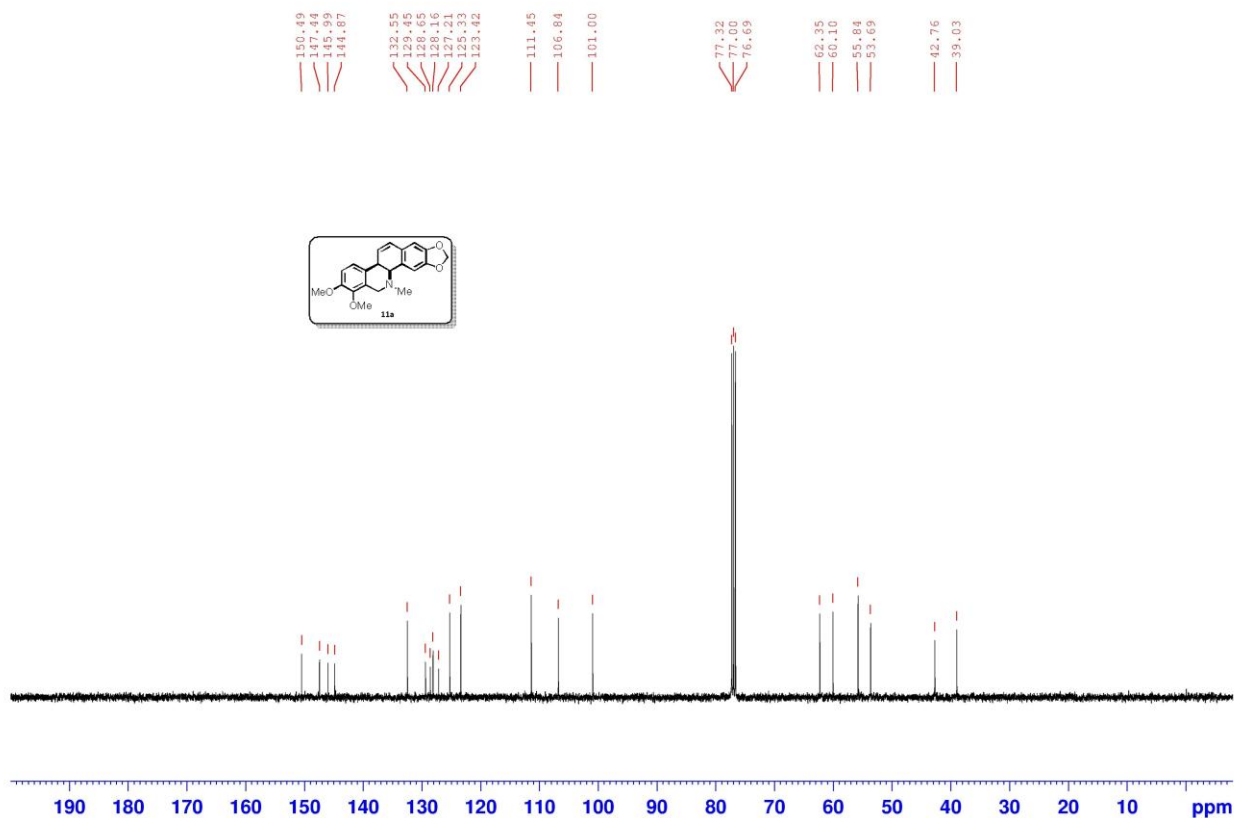

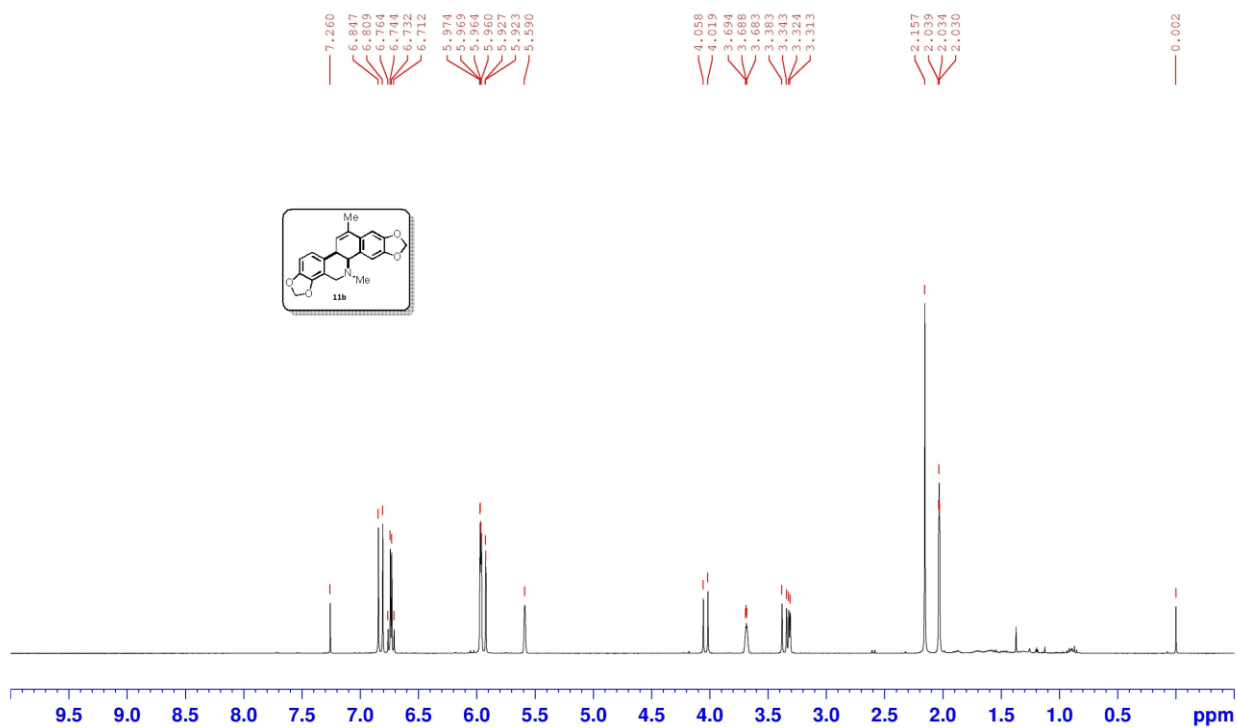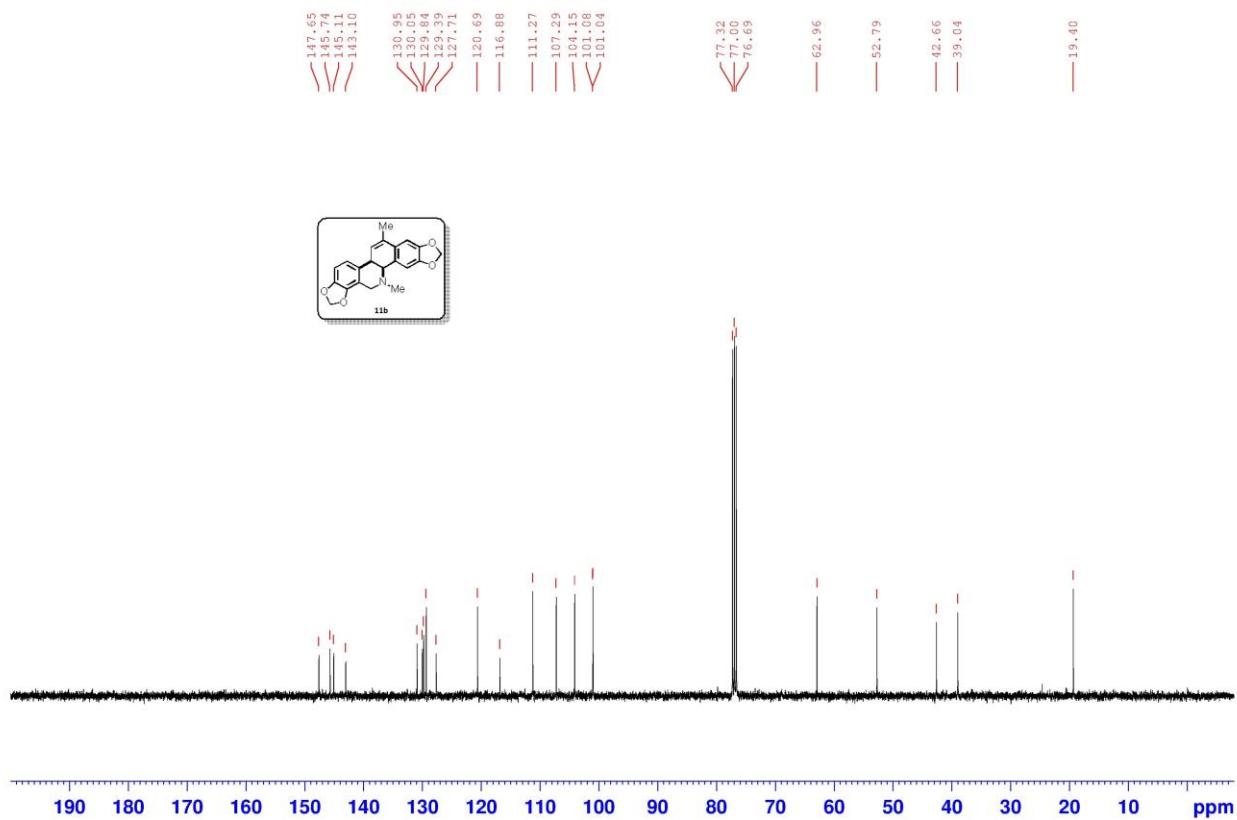

Supplement: c7cc09875h1.pdf [file c7cc09875h1.pdf]
